# Supplementary material for: The diversity and function of sourdough starter microbiomes
Source: eLife. 2021 Jan 26;10:e61644. doi: 10.7554/eLife.61644 (PMC7837699; doi:10.7554/eLife.61644)
Supplement: Figure 2—source data 1. [file elife-61644-fig2-data1.xlsx]

## Sheet: Figure 2 - source data 1
	Class	Order	Family	Genus
Bacteria
ASV_17	Gammaproteobacteria	Enterobacteriales	Enterobacteriaceae	Pantoea
ASV_37	Gammaproteobacteria	Enterobacteriales	Enterobacteriaceae	NA
ASV_63	Gammaproteobacteria	Enterobacteriales	Enterobacteriaceae	NA
ASV_75	Gammaproteobacteria	Pseudomonadales	Pseudomonadaceae	Pseudomonas
ASV_64	Gammaproteobacteria	Pseudomonadales	Pseudomonadaceae	Pseudomonas
ASV_62	Gammaproteobacteria	Pseudomonadales	Pseudomonadaceae	Pseudomonas
ASV_113	Actinobacteria	Micrococcales	Microbacteriaceae	Curtobacterium
ASV_120	Gammaproteobacteria	Pseudomonadales	Pseudomonadaceae	Pseudomonas
ASV_82	Gammaproteobacteria	Enterobacteriales	Enterobacteriaceae	Klebsiella
ASV_136	Gammaproteobacteria	Pseudomonadales	Moraxellaceae	Acinetobacter
ASV_159	Bacilli	Bacillales	Paenibacillaceae	Paenibacillus
ASV_177	Gammaproteobacteria	Pseudomonadales	Pseudomonadaceae	Pseudomonas
ASV_196	Alphaproteobacteria	Sphingomonadales	Sphingomonadaceae	Sphingomonas
ASV_207	Gammaproteobacteria	Pseudomonadales	Moraxellaceae	Acinetobacter
ASV_195	Gammaproteobacteria	Pseudomonadales	Pseudomonadaceae	Pseudomonas
ASV_184	Gammaproteobacteria	Betaproteobacteriales	Burkholderiaceae	Massilia
ASV_179	Gammaproteobacteria	Enterobacteriales	Enterobacteriaceae	Erwinia
ASV_194	Gammaproteobacteria	Xanthomonadales	Xanthomonadaceae	Xanthomonas
ASV_205	Gammaproteobacteria	Pseudomonadales	Pseudomonadaceae	Pseudomonas
ASV_238	Alphaproteobacteria	Sphingomonadales	Sphingomonadaceae	Sphingomonas
Fungi
ASV_2	Dothideomycetes	Pleosporales	Pleosporaceae	Alternaria
ASV_8	Sordariomycetes	Hypocreales	Nectriaceae	Fusarium
ASV_12	Dothideomycetes	Capnodiales	Mycosphaerellaceae	Mycosphaerella
ASV_20	Dothideomycetes	Pleosporales	Pleosporaceae	Alternaria
ASV_24	Dothideomycetes	Capnodiales	Cladosporiaceae	Cladosporium
ASV_28	Tremellomycetes	Filobasidiales	Filobasidiaceae	Filobasidium
ASV_39	Dothideomycetes	Pleosporales	Phaeosphaeriaceae	Parastagonospora
ASV_38	Sordariomycetes	Hypocreales	Nectriaceae	Gibberella
ASV_41	Dothideomycetes	Pleosporales	Pleosporaceae	Alternaria
ASV_40	Tremellomycetes	Cystofilobasidiales	Mrakiaceae	Udeniomyces
ASV_43	Microbotryomycetes	Sporidiobolales	Sporidiobolaceae	Sporobolomyces
ASV_46	Sordariomycetes	Trichosphaeriales	Trichosphaeriaceae	Nigrospora
ASV_49	Eurotiomycetes	Eurotiales	Aspergillaceae	Aspergillus
ASV_55	Sordariomycetes	Xylariales	Microdochiaceae	Microdochium
ASV_51	Eurotiomycetes	Eurotiales	Aspergillaceae	Aspergillus
ASV_54	Dothideomycetes	Pleosporales	Pleosporaceae	Alternaria
ASV_57	Dothideomycetes	Pleosporales	Phaeosphaeriaceae	Parastagonospora
ASV_62	Dothideomycetes	Pleosporales	Pleosporaceae	Alternaria
ASV_66	Tremellomycetes	Tremellales	Tremellaceae	Bulleromyces
ASV_67	Sordariomycetes	Hypocreales	Clavicipitaceae	Claviceps

## Sheet: Readme
Figure 2 - source data 1 - The most abundant bacterial and fungal taxa across the 500 sourdough starter samples that are not typically considered an active part of starter communities (e.g. excluding yeasts, lactic acid bacteria, and acetic acid bacteria). All other bacteria together comprised less than 3% (2.8%) of the overall relative abundance and all non-yeast fungi together comprised just un…
