# Supplementary material for: The diversity and function of sourdough starter microbiomes
Source: eLife. 2021 Jan 26;10:e61644. doi: 10.7554/eLife.61644 (PMC7837699; doi:10.7554/eLife.61644)
Supplement: Figure 2—source data 2. [file elife-61644-fig2-data2.xlsx]

## Sheet: Figure 4 - source data 2
Species	Rel. ab	SD	Class	Order	Family
Acetic Acid Bacteria
Acetobacter malorum spp. group	0.188	0.382	Alphaproteo.	Acetobacterales	Acetobacteraceae
Acetobacter pasteurianus/papayae	0.064	0.233	Alphaproteo.	Acetobacterales	Acetobacteraceae
Acetobacter lovaniensis spp. group	0.047	0.196	Alphaproteo.	Acetobacterales	Acetobacteraceae
Gluconobacter frateurii spp. group	0.026	0.156	Alphaproteo.	Acetobacterales	Acetobacteraceae
Gluconobacter sphaericus spp. group	0.02	0.133	Alphaproteo.	Acetobacterales	Acetobacteraceae
Komagataeibacter cluster 4	0.016	0.105	Alphaproteo.	Acetobacterales	Acetobacteraceae
Acetobacter tropicalis	0.015	0.116	Alphaproteo.	Acetobacterales	Acetobacteraceae
Lactic Acid Bacteria
Lactobacillus brevis	0.2	0.285	Bacilli	Lactobacillales	Lactobacillaceae
L. sanfranciscensis	0.174	0.365	Bacilli	Lactobacillales	Lactobacillaceae
Pediococcus parvulus	0.134	0.301	Bacilli	Lactobacillales	Lactobacillaceae
Lactobacillus plantarum spp. group	0.114	0.227	Bacilli	Lactobacillales	Lactobacillaceae
L. paralimentarius	0.114	0.249	Bacilli	Lactobacillales	Lactobacillaceae
Lactobacillus sakei	0.041	0.177	Bacilli	Lactobacillales	Lactobacillaceae
Lactobacillus rossiae	0.032	0.127	Bacilli	Lactobacillales	Lactobacillaceae
Pediococcus damnosus/inopanotus	0.031	0.166	Bacilli	Lactobacillales	Lactobacillaceae
Lactobacillus casei spp. group	0.028	0.125	Bacilli	Lactobacillales	Lactobacillaceae
Lactobacillus hammesii/parabrevis	0.017	0.104	Bacilli	Lactobacillales	Lactobacillaceae
Lactobacillus cluster_20	0.015	0.095	Bacilli	Lactobacillales	Lactobacillaceae
Lactobacillus diolivorans	0.014	0.098	Bacilli	Lactobacillales	Lactobacillaceae
Pediococcus pentosaceus	0.01	0.077	Bacilli	Lactobacillales	Lactobacillaceae
Lactobacillus coryniformis	0.009	0.068	Bacilli	Lactobacillales	Lactobacillaceae
Pediococcus ethanolidurans	0.008	0.082	Bacilli	Lactobacillales	Lactobacillaceae
Lactobacillus cluster_2	0.007	0.067	Bacilli	Lactobacillales	Lactobacillaceae
Leuconostoc lactis	0.007	0.048	Bacilli	Lactobacillales	Leuconostocaceae
Lactobacillus cluster_59	0.005	0.047	Bacilli	Lactobacillales	Lactobacillaceae
Lactobacillus xianfangensis	0.005	0.043	Bacilli	Lactobacillales	Lactobacillaceae
Lactobacillus harbinensis	0.004	0.043	Bacilli	Lactobacillales	Lactobacillaceae
Lactobacillus senmaizukei	0.004	0.021	Bacilli	Lactobacillales	Lactobacillaceae
Lactobacillus zymae/acidifarinae	0.003	0.036	Bacilli	Lactobacillales	Lactobacillaceae
Lactobacillus similis/odoratitofui	0.003	0.042	Bacilli	Lactobacillales	Lactobacillaceae
Lactobacillus spicheri	0.003	0.04	Bacilli	Lactobacillales	Lactobacillaceae
Leuc. mesenteroides/pseudomesenteroides	0.002	0.04	Bacilli	Lactobacillales	Leuconostocaceae
Leuconostoc gelidum	0.002	0.033	Bacilli	Lactobacillales	Leuconostocaceae
Lactococcus lactis	0.002	0.021	Bacilli	Lactobacillales	Streptococcaceae
Lactobacillus fermentum	0.001	0.023	Bacilli	Lactobacillales	Lactobacillaceae
Lactobacillus cluster_146	0.001	0.027	Bacilli	Lactobacillales	Lactobacillaceae
L. malefermentans	0.001	0.019	Bacilli	Lactobacillales	Lactobacillaceae
Lactobacillus cluster_169	0.001	0.014	Bacilli	Lactobacillales	Lactobacillaceae
Lactobacillus cluster_117	0.001	0.013	Bacilli	Lactobacillales	Lactobacillaceae
Lactobacillus cluster_313	0.001	0.011	Bacilli	Lactobacillales	Lactobacillaceae
Lactobacillus cluster_179	0.001	0.01	Bacilli	Lactobacillales	Lactobacillaceae
Lactobacillus acetotolerans	0.001	0.01	Bacilli	Lactobacillales	Lactobacillaceae
Streptococcus infantarius	0.001	0.01	Bacilli	Lactobacillales	Streptococcaceae
Lactobacillus crustorum spp. group	0.001	0.008	Bacilli	Lactobacillales	Lactobacillaceae
Weissella cibaria/confusa	0.001	0.007	Bacilli	Lactobacillales	Leuconostocaceae
Yeast
Saccharomyces cerevisiae	0.761	0.36	Saccharomycetes	Saccharomycetales	Saccharomycetaceae
Kazachstania humilis	0.032	0.157	Saccharomycetes	Saccharomycetales	Saccharomycetaceae
Saccharomycetales sp.	0.026	0.128	Saccharomycetes	Saccharomycetales	NA
Kazachstania servazzii	0.026	0.13	Saccharomycetes	Saccharomycetales	Saccharomycetaceae
Wickerhamomyces anomalus	0.026	0.101	Saccharomycetes	Saccharomycetales	Phaffomycetaceae
Pichia membranifaciens	0.019	0.094	Saccharomycetes	Saccharomycetales	Pichiaceae
Kazachstania unispora	0.018	0.112	Saccharomycetes	Saccharomycetales	Saccharomycetaceae
Naumovozyma castellii	0.017	0.114	Saccharomycetes	Saccharomycetales	Saccharomycetaceae
Candida sake	0.016	0.101	Saccharomycetes	Saccharomycetales	fam_Incertae_sedis
Saccharomyces bayanus	0.014	0.109	Saccharomycetes	Saccharomycetales	Saccharomycetaceae
Kazachstania barnettii	0.007	0.074	Saccharomycetes	Saccharomycetales	Saccharomycetaceae
Issatchenkia orientalis	0.006	0.052	Saccharomycetes	Saccharomycetales	Saccharomycetaceae
Kazachstania exigua	0.006	0.075	Saccharomycetes	Saccharomycetales	Saccharomycetaceae
Candida quercitrusa	0.003	0.026	Saccharomycetes	Saccharomycetales	fam_Incertae_sedis
Nakaseomyces sp.	0.003	0.046	Saccharomycetes	Saccharomycetales	Saccharomycetaceae
Pichia mandshurica	0.002	0.044	Saccharomycetes	Saccharomycetales	Pichiaceae
Pichia kluyveri	0.002	0.026	Saccharomycetes	Saccharomycetales	Pichiaceae
Vanderwaltozyma yarrowii	0.002	0.039	Saccharomycetes	Saccharomycetales	Saccharomycetaceae
Kazachstania naganishii	0.001	0.024	Saccharomycetes	Saccharomycetales	Saccharomycetaceae
Candida solani	0.001	0.008	Saccharomycetes	Saccharomycetales	fam_Incertae_sedis
Pichia norvegensis	0.001	0.014	Saccharomycetes	Saccharomycetales	Pichiaceae
Hanseniaspora uvarum	0.001	0.018	Saccharomycetes	Saccharomycetales	Saccharomycodaceae
Candida santamariae	0.001	0.006	Saccharomycetes	Saccharomycetales	fam_Incertae_sedis
Candida tropicalis	0.001	0.01	Saccharomycetes	Saccharomycetales	fam_Incertae_sedis
Cyberlindnera fabianii	0.001	0.005	Saccharomycetes	Saccharomycetales	Phaffomycetaceae
Torulaspora delbrueckii	0.001	0.015	Saccharomycetes	Saccharomycetales	Saccharomycetaceae
Candida parapsilosis	0.001	0.01	Saccharomycetes	Saccharomycetales	fam_Incertae_sedis
Meyerozyma guilliermo.	0.001	0.015	Saccharomycetes	Saccharomycetales	Debaryomycetaceae
Trichomonascus ciferrii	0.001	0.008	Saccharomycetes	Saccharomycetales	Trichomonascaceae
Dipodascaceae sp.	0.001	0.003	Saccharomycetes	Saccharomycetales	Dipodascaceae

## Sheet: Readme
Figure 2 - source data 2 - The most abundant acetic acid bacteria, lactic acid bacteria, and yeast species across the 500 sourdough starter samples. Relative abundance is expressed as a fraction of one. Taxa with a mean relative abundance ≥ 0.001 are shown.
