# Supplementary material for: The diversity and function of sourdough starter microbiomes
Source: eLife. 2021 Jan 26;10:e61644. doi: 10.7554/eLife.61644 (PMC7837699; doi:10.7554/eLife.61644)
Supplement: Figure 2—source data 3. [file elife-61644-fig2-data3.xlsx]

## Sheet: Figure 2 - source data 3
Species 1 name	Species 2 name	Species 1	Species 2	Observed co-occurrences	Prob. of co-occurrence	Expected	Effect size	value	Bonferroni-
		incidence	incidence			co-occurrences			corrected
									value
Kazachstania humilis	Saccharomyces cerevisiae	28	451	17	0.051	25.3	-0.0166	2e-05	0.01208
Kazachstania humilis	Lactobacillus sanfranciscensis	28	114	17	0.013	6.4	0.0212	1e-05	0.00604
Kazachstania servazzii	Saccharomyces cerevisiae	26	451	16	0.047	23.5	-0.015	5e-05	0.0302
Kazachstania servazzii	Candida sake	26	21	7	0.002	1.1	0.0118	3e-05	0.01812
Kazachstania servazzii	Pediococcus damnosus	26	24	8	0.002	1.2	0.0136	1e-05	0.00604
Saccharomyces bayanus	Saccharomyces cerevisiae	13	451	6	0.023	11.7	-0.0114	6e-05	0.03624
Saccharomyces cerevisiae	Lactobacillus sanfranciscensis	451	114	90	0.206	102.8	-0.0256	2e-05	0.01208
Lactobacillus brevis	Lactobacillus paralimentarius	265	124	86	0.131	65.7	0.0406	2e-05	0.01208
Lactobacillus brevis	Lactobacillus plantarum	265	181	161	0.192	95.9	0.1302	0	0
Lactobacillus brevis	Lactobacillus sanfranciscensis	265	114	20	0.121	60.4	-0.0808	0	0
Lactobacillus paralimentarius	Lactobacillus rossiae	124	65	30	0.032	16.1	0.0278	5e-05	0.0302
Lactobacillus plantarum	Lactobacillus sanfranciscensis	181	114	12	0.083	41.3	-0.0586	0	0
Lactobacillus plantarum	Pediococcus parvulus	181	120	13	0.087	43.4	-0.0608	0	0
Lactobacillus rossiae	Lactobacillus sanfranciscensis	65	114	3	0.03	14.8	-0.0236	3e-05	0.01812
Lactobacillus sakei	Pediococcus pentosaceus	38	19	11	0.003	1.4	0.0192	0	0
Lactobacillus sakei	Leuconostoc lactis	38	23	9	0.003	1.7	0.0146	1e-05	0.00604

## Sheet: Readme
table supplement 3 - Co-occurrence statistics of sourdough yeast and bacteria calculated with the R package ‘cooccur’. Only Bonferroni-corrected p values of <0.05 are included. Effect size = (observed number of co-occurrences - expected number of co-occurrences)/total number of starters. Direction of the effect indicates species that co-occur more (+) or less (-) frequently than expected given th…
