# Supplementary material for: The diversity and function of sourdough starter microbiomes
Source: eLife. 2021 Jan 26;10:e61644. doi: 10.7554/eLife.61644 (PMC7837699; doi:10.7554/eLife.61644)
Supplement: Figure 2—source data 4. [file elife-61644-fig2-data4.xlsx]

## Sheet: Figure 2 - source data 4
Variable	Data Class	Levels
Starter age (years)	continuous	NA
Who Made	Factor w/ 2 levels	"Company/Business", "Individual"
StarterInput	Factor w/ 8 levels	"Dairy", "DryActiveStarter", "FermentedProduce", "FreshProduce", "HubStarter", "MainHub", "Other"
Storage Location	Factor w/ 5 levels	"Below room temp", "Fridge and room temp", "Other", "Refrigerator", "Room temp"
Feeds Per Month	continuous	NA
Freq. opened per week	continuous
Sensory notes
Fruity	y/n	NA
Sour	y/n	NA
musty	y/n	NA
medicinal	y/n	NA
biscuity	y/n	NA
floral	y/n	NA
No Smell	y/n	NA
Grain Base	y/n	NA
Rye
bleached wheat	y/n	NA
whole wheat	y/n	NA
Unbleached	y/n	NA
Water source
Tap	y/n	NA
Filtered	y/n	NA
Rainwater	y/n	NA
Bottled	y/n	NA
Snow	y/n	NA
Well	y/n	NA
	y/n	NA
Pets
Cat
Dog	y/n	NA
	Factor w/ 5 levels	"Ceramic", "Glass", "Plastic", "Stainless Steel", "Various"
Container
Container Material
Lid Material	Factor w/ 2 levels	"NonPorous", "Porous"
	continuous	NA
Climatic
Temp
Seasonality	continuous	NA
MaxTemp	continuous	NA
MinTemp	continuous	NA
Prec	continuous	NA
npp	continuous	NA

## Sheet: Readme
Predictors (n=33) included in PERMANOVA tests on bacterial and fungal dissimilarities: grain base inputs, other process attributes (starter origin, starter input, storage location, number of feeds per month, frequency opened per week, container material, container lid); water source; sensory notes described by participant; pet presence; and location-based climatic variables obtained from latitude…
