# Supplementary material for: The diversity and function of sourdough starter microbiomes
Source: eLife. 2021 Jan 26;10:e61644. doi: 10.7554/eLife.61644 (PMC7837699; doi:10.7554/eLife.61644)
Supplement: Figure 2—source data 5. [file elife-61644-fig2-data5.xlsx]

## Sheet: Figure 2 - source data 5
	df	SumsOfSqs	MeanSq	F.Model	R2	Pr(>F)
Bacterial Predictors
Storage location	4	4.39	1.097	3.23	0.029	0.001	***
Starter origin	1	3.193	3.193	9.396	0.021	0.001	***
Mean annual temp. (MAT)	1	1.065	1.065	3.135	0.007	0.003	**
Feeds per month	1	1.206	1.206	3.549	0.008	0.001	***
Whole wheat grain base	1	0.676	0.676	1.991	0.004	0.037	*
Starter age (years)	1	0.735	0.735	2.162	0.005	0.02	*
Seasonality	1	0.771	0.771	2.269	0.005	0.018	*
Maximum temp. (MAXT)	1	0.711	0.711	2.094	0.005	0.022	*
Residuals	414	140.677	0.34	0.917
Total	425	153.425	1
Fungal Predictors
Seasonality	1	1.45	1.45	5.442	0.012	0.001	***
Storage location	4	1.59	0.398	1.493	0.013	0.009	**
Rye grain base	1	1.119	1.119	4.2	0.009	0.001	***
Whole wheat grain base	1	0.958	0.958	3.597	0.008	0.001	***
Starter origin	1	0.691	0.691	2.593	0.006	0.002	**
Maximum temp.	1	0.718	0.718	2.697	0.006	0.001	***
Mean annual temp (MAT)	1	0.778	0.778	2.921	0.007	0.001	***
Rain water (source)	1	0.698	0.698	2.622	0.006	0.004	**
Unbleached grain base	1	0.429	0.429	1.609	0.004	0.045	*
Minimum temp. (MINT)	1	0.461	0.461	1.73	0.004	0.017	*
Residuals	412	109.743	0.266	0.925
Total	425	118.635	1

## Sheet: Readme
Abiotic properties are poor predictors of overall variation in both bacterial and fungal community composition across sourdough starters. Abiotic properties tested include process parameters such as starter storage location, origin (business or individual), number of feeds per month, grain base used (whole wheat, rye, etc.) and climate variables derived from starter location (including mean annua…
