# Supplementary material for: The diversity and function of sourdough starter microbiomes
Source: eLife. 2021 Jan 26;10:e61644. doi: 10.7554/eLife.61644 (PMC7837699; doi:10.7554/eLife.61644)
Supplement: Figure 2—source data 6. [file elife-61644-fig2-data6.xlsx]

## Sheet: Figure 2 -source data 6
Taxa.label	ASV.ID	Predictor.of	Strength	p.fdr	Predictor	Var.type
Alternaria	ASV_2	high.MaxTemp	0.219	0	MaxTemp	continuous
Alternaria	ASV_41	high.MaxTemp	0.187	0.002	MaxTemp	continuous
Alternaria	ASV_87	high.MaxTemp	0.16	0.008	MaxTemp	continuous
Alternaria	ASV_62	low.MaxTemp	-0.185	0.002	MaxTemp	continuous
Aspergillus	ASV_82	high.MaxTemp	0.134	0.032	MaxTemp	continuous
Aureobasidium	ASV_102	low.MaxTemp	-0.177	0.003	MaxTemp	continuous
Filobasidium	ASV_28	high.MaxTemp	0.164	0.007	MaxTemp	continuous
Filobasidium	ASV_95	high.MaxTemp	0.149	0.017	MaxTemp	continuous
Filobasidium	ASV_117	low.MaxTemp	-0.215	0	MaxTemp	continuous
Fusarium	ASV_80	high.MaxTemp	0.202	0.001	MaxTemp	continuous
Hannaella	ASV_180	high.MaxTemp	0.144	0.021	MaxTemp	continuous
L. sanfranciscensis	ASV_3	low.MaxTemp	-0.18	0.003	MaxTemp	continuous
Mycosphaerella	ASV_12	low.MaxTemp	-0.13	0.036	MaxTemp	continuous
Nigrospora	ASV_46	high.MaxTemp	0.132	0.034	MaxTemp	continuous
Sporobolomyces	ASV_43	high.MaxTemp	0.201	0.001	MaxTemp	continuous
Vishniacozyma	ASV_139	high.MaxTemp	0.137	0.028	MaxTemp	continuous
Vishniacozyma	ASV_115	low.MaxTemp	-0.142	0.021	MaxTemp	continuous
Alternaria	ASV_41	not.Rye	-0.152	0.044	RyeBase	categorical
Alternaria	ASV_20	Rye	0.134	0.044	RyeBase	categorical
Alternaria	ASV_62	Rye	0.141	0.044	RyeBase	categorical
Aureobasidium	ASV_102	Rye	0.23	0.044	RyeBase	categorical
Bipolaris	ASV_122	Rye	0.233	0.044	RyeBase	categorical
Bulleromyces	ASV_66	not.Rye	-0.14	0.044	RyeBase	categorical
Filobasidium	ASV_28	not.Rye	-0.191	0.044	RyeBase	categorical
Nigrospora	ASV_46	not.Rye	-0.134	0.044	RyeBase	categorical
Vishniacozyma	ASV_126	Rye	0.18	0.044	RyeBase	categorical
Alternaria	ASV_2	high.Seasonality	0.249	0	Seasonality	continuous
Alternaria	ASV_20	high.Seasonality	0.128	0.032	Seasonality	continuous
Apiosporaceae	ASV_164	high.Seasonality	0.17	0.003	Seasonality	continuous
Bipolaris	ASV_122	high.Seasonality	0.13	0.032	Seasonality	continuous
Bulleromyces	ASV_66	high.Seasonality	0.287	0	Seasonality	continuous
Candida	ASV_104	high.Seasonality	0.129	0.032	Seasonality	continuous
Cladosporium	ASV_24	high.Seasonality	0.178	0.002	Seasonality	continuous
Cystofilobasidium	ASV_92	low.Seasonality	-0.131	0.032	Seasonality	continuous
Diaporthe	ASV_196	high.Seasonality	0.189	0.001	Seasonality	continuous
Enterobacteriaceae	ASV_37	high.Seasonality	0.206	0	Seasonality	continuous
Enterobacteriaceae	ASV_63	high.Seasonality	0.138	0.034	Seasonality	continuous
Filobasidium	ASV_117	low.Seasonality	-0.141	0.02	Seasonality	continuous
Fusarium	ASV_8	high.Seasonality	0.34	0	Seasonality	continuous
Gibberella	ASV_38	high.Seasonality	0.248	0	Seasonality	continuous
Microdochium	ASV_55	high.Seasonality	0.306	0	Seasonality	continuous
Parastagonospora	ASV_39	high.Seasonality	0.197	0	Seasonality	continuous
Parastagonospora	ASV_57	high.Seasonality	0.21	0	Seasonality	continuous
Phaeosphaeriaceae	ASV_146	high.Seasonality	0.305	0	Seasonality	continuous
Saccharomyces cerevisiae	ASV_3	low.Seasonality	-0.126	0.034	Seasonality	continuous
Sporobolomyces	ASV_43	high.Seasonality	0.13	0.032	Seasonality	continuous
Sporobolomyces	ASV_78	high.Seasonality	0.174	0.002	Seasonality	continuous
Stemphylium	ASV_121	high.Seasonality	0.121	0.045	Seasonality	continuous
Vishniacozyma	ASV_160	high.Seasonality	0.158	0.006	Seasonality	continuous
Wallemia	ASV_119	high.Seasonality	0.14	0.02	Seasonality	continuous
Lactobacillus brevis	ASV_4	Individual	0.206	0.04	Starter.Origin	categorical
L. sanfranciscensis	ASV_3	Business	-0.267	0.04	Starter.Origin	categorical
Lactobacillus brevis	ASV_4	young.StarterAge	-0.254	0	StarterAge	continuous
Lactobacillus plantarum spp. group	ASV_6	young.StarterAge	-0.238	0	StarterAge	continuous
L. sanfranciscensis	ASV_3	old.StarterAge	0.143	0.01	StarterAge	continuous
Pediococcus parvulus	ASV_7	old.StarterAge	0.222	0	StarterAge	continuous
Pantoea	ASV_17	young.StarterAge	-0.157	0.005	StarterAge	continuous
Alternaria	ASV_41	high.temperature	0.17	0.007	temperature	continuous
Aspergillus	ASV_82	high.temperature	0.138	0.043	temperature	continuous
Bulleromyces	ASV_66	low.temperature	-0.157	0.015	temperature	continuous
Fusarium	ASV_8	low.temperature	-0.181	0.005	temperature	continuous
Gibberella	ASV_38	low.temperature	-0.176	0.005	temperature	continuous
Lactobacillus plantarum spp. group	ASV_6	high.temperature	0.162	0.013	temperature	continuous
Microdochium	ASV_55	low.temperature	-0.216	0.001	temperature	continuous
Parastagonospora	ASV_57	low.temperature	-0.191	0.003	temperature	continuous
Vishniacozyma	ASV_115	low.temperature	-0.142	0.038	temperature	continuous
Alternaria	ASV_20	not.WholeWheat	-0.138	0.04	WholeWheat	categorical
Aspergillus	ASV_51	not.WholeWheat	-0.13	0.04	WholeWheat	categorical
Bulleromyces	ASV_66	not.WholeWheat	-0.159	0.04	WholeWheat	categorical
Dioszegia	ASV_79	not.WholeWheat	-0.167	0.04	WholeWheat	categorical
Fusarium	ASV_112	WholeWheat	0.186	0.04	WholeWheat	categorical
Parastagonospora	ASV_57	not.WholeWheat	-0.16	0.04	WholeWheat	categorical
Parastagonospora	ASV_74	not.WholeWheat	-0.125	0.04	WholeWheat	categorical
Saccharomyces cerevisiae	ASV_4	WholeWheat	0.157	0.04	WholeWheat	categorical
Sporobolomyces	ASV_43	not.WholeWheat	-0.148	0.04	WholeWheat	categorical
Wallemia	ASV_119	not.WholeWheat	-0.125	0.04	WholeWheat	categorical

## Sheet: Readme
Complete list of indicator taxa and summary statistics, as described in Figure 2.
