# Supplementary material for: The diversity and function of sourdough starter microbiomes
Source: eLife. 2021 Jan 26;10:e61644. doi: 10.7554/eLife.61644 (PMC7837699; doi:10.7554/eLife.61644)
Supplement: Figure 3—source data 1. [file elife-61644-fig3-data1.xlsx]

## Sheet: Readme
CFU counts and relative abundance data from competitions, transfers 1, 3, and 6 - Pairs were transferred every 48 hours through filtered flour media (see materials and methods).
All "RA" tabs contain relative abundance data, and "AA" tabs contain raw counts. Species were abbreviated to letters and numbers for this analysis. Species names are below.
1	Wickerhamomyces anomalus
2	Saccharomyces cerevisiae
3	Kazachstania servazii
4	Kazachstania humilis
A	Lactobacillus sanfranciscensis
B	Lactobacillus plantarum
C	Lactobacillus brevis
D	Lactobacillus paralimentarius

## Sheet: xfer1RA
Sp1	Sp2	R1.One	R1.Two	R2.One	R2.Two	R3.One	R3.Two	R4.One	R4.Two	R5.One	R5.Two
1	1	100	0	100	0	100	0	100	0	100	0
1	2	94.5312	5.46875	94.6667	5.33333	98.8889	1.11111	91.7603	8.2397	89.426	10.574
1	3	99.0272	0.972763	99.5294	0.470588	98.5	1.5	99.1266	0.873362	98.8235	1.17647
1	4	95.858	4.14201	94	6	97.5352	2.46479	97.6744	2.32558	97.546	2.45399
2	2	100	0	100	0	100	0	100	0	100	0
2	3	97.5	2.5	99.0854	0.914634	90.3226	9.67742	99.1404	0.859599	98.0132	1.98675
2	4	93.5143	6.48567	88.8889	11.1111	100	0	77.7778	22.2222	80.3279	19.6721
3	3	100	0	100	0	100	0	100	0	100	0
3	4	20.4545	79.5455	6.36943	93.6306	7.69231	92.3077	15.2778	84.7222	16	84
4	4	100	0	100	0	100	0	100	0	100	0
A	A	100	0	100	0	100	0	100	0	100	0
A	B	2.07715	97.9228	0.877193	99.1228	4.38596	95.614	15	85	6.73077	93.2692
A	C	5.12821	94.8718	8.83392	91.1661	13.6752	86.3248	#VALUE!	#VALUE!	#VALUE!	#VALUE!
A	D	45.4545	54.5455	27.1739	72.8261	46.25	53.75	22.973	77.027	14.8936	85.1064
B	B	100	0	100	0	100	0	100	0	100	0
B	C	85.2632	14.7368	90.1763	9.82368	83.4711	16.5289	#VALUE!	#VALUE!	#VALUE!	#VALUE!
B	D	99.6732	0.326797	99.095	0.904977	99.1803	0.819672	99.1758	0.824176	99.375	0.625
C	C	100	0	100	0	100	0	#VALUE!	#VALUE!	#VALUE!	#VALUE!
C	D	91.6667	8.33333	94.5736	5.42636	87.4372	12.5628	#VALUE!	#VALUE!	#VALUE!	#VALUE!
D	D	100	0	100	0	100	0	100	0	100	0
A	1	0.149775	99.8502	0.019996	99.98	0.212049	99.788	33.3333	66.6667	0.0732796	99.9267
A	2	0.00294109	99.9971	0.0666223	99.9334	0.373599	99.6264	0	100	0.136178	99.8638
A	3	99.9994	0.000551721	100	0	100	0	100	0	99.999	0.000967733
A	4	98.8372	1.16279	94.1423	5.85774	76.9231	23.0769	66.1765	33.8235	63.8298	36.1702
B	1	95.1613	4.83871	87.0968	12.9032	88.5714	11.4286	89.1026	10.8974	99.1536	0.846433
B	2	98.1638	1.83616	97.7383	2.26171	97.3054	2.69461	96.0265	3.97351	93.1973	6.80272
B	3	99.9997	0.000267856	100	0	100	0	100	0	99.9998	0.000168776
B	4	99.8819	0.11814	99.3341	0.665927	98.5915	1.40845	98.7991	1.20087	98.9446	1.05541
C	1	58.0952	41.9048	41.1765	58.8235	48.0519	51.9481	39.3939	60.6061	60.396	39.604
C	2	69.2308	30.7692	63.6364	36.3636	85	15	66.6667	33.3333
C	3	100	0	99.9987	0.00130839	100	0	100	0	99.9996	0.000447759
C	4	85.4545	14.5455	86.8852	13.1148	98.6395	1.36054	85.7143	14.2857	95.4545	4.54545
D	1	35.4839	64.5161	20	80	27.2727	72.7273	6.97674	93.0233	18.3673	81.6327
D	2	91.5493	8.4507	53.8462	46.1538	84.9057	15.0943	100	0	76.9231	23.0769
D	3	98.5222	1.47783	99.0545	0.94552	73.5294	26.4706	99.0099	0.990099	99.3092	0.690846
D	4	70.7317	29.2683	98.5915	1.40845	83.3333	16.6667	90.9091	9.09091	83.3333	16.6667

## Sheet: xfer3RA
Sp1	Sp2	R1.One	R1.Two	R2.One	R2.Two	R3.One	R3.Two	R4.One	R4.Two	R5.One	R5.Two
1	1	100	0	100	0	100	0	100	0	100	0
1	2	95.7784	4.22164	90.0208	9.97921	99.1935	0.806452	#VALUE!	#VALUE!	96.6777	3.32226
1	3	100	0	100	0	100	0	#VALUE!	#VALUE!	100	0
1	4	#VALUE!	#VALUE!	98	2	100	0	100	0	98.4894	1.51057
2	2	100	0	100	0	100	0	100	0	100	0
2	3	100	0	100	0	100	0	100	0	100	0
2	4	37.7049	62.2951	79.0123	20.9877	64.9123	35.0877	64.2857	35.7143	71.6049	28.3951
3	3	100	0	100	0	100	0	#VALUE!	#VALUE!	100	0
3	4	2.97297	97.027	100	0	#VALUE!	#VALUE!	100	0	100	0
4	4	100	0	100	0	100	0	100	0	100	0
A	A	100	0	#VALUE!	#VALUE!	100	0	100	0	100	0
A	B	0	100	0	100	0	100	0	100	0	100
A	C	4.73934	95.2607	3.92157	96.0784	3.18725	96.8127	#VALUE!	#VALUE!	#VALUE!	#VALUE!
A	D	0	100	0	100	0	100	0	100	0	100
B	B	100	0	100	0	100	0	100	0	100	0
B	C	87.1698	12.8302	90.0735	9.92647	91.0543	8.94569	#VALUE!	#VALUE!	#VALUE!	#VALUE!
B	D	99.4695	0.530504	99.5968	0.403226	99.6942	0.30581	100	0	99.4169	0.58309
C	C	100	0	100	0	100	0	#VALUE!	#VALUE!	#VALUE!	#VALUE!
C	D	48.8235	51.1765	31.5068	68.4932	52.439	47.561	#VALUE!	#VALUE!	#VALUE!	#VALUE!
D	D	100	0	100	0	100	0	100	0	100	0
A	1	0.009999	99.99	0.0908265	99.9092	0.00499975	99.995	0.0449798	99.955	1.63934	98.3607
A	2	0	100	0	100	0.138696	99.8613	0	100
A	3	100	0	100	0	100	0	100	0	100	0
A	4	92.5926	7.40741	99.4318	0.568182	95.8904	4.10959	71.4286	28.5714	99.6919	0.308138
B	1	86.5385	13.4615	89.2857	10.7143	79.1667	20.8333	76.7442	23.2558	92.0245	7.97546
B	2	97.9325	2.06746	95.2381	4.7619	96.7742	3.22581	89.2857	10.7143	100	0
B	3	100	0	100	0	100	0	100	0	100	0
B	4	98.6547	1.34529	99.827	0.173033	90	10	99.1501	0.849858	99.8843	0.115656
C	1	50	50	37.5	62.5	53.8462	46.1538	34.8837	65.1163	60	40
C	2	68.254	31.746	57.0815	42.9185	74.0741	25.9259	74.0741	25.9259	31.25	68.75
C	3	100	0	100	0	100	0	100	0	100	0
C	4	96.8992	3.10078	53.4884	46.5116	86.9565	13.0435	93.0233	6.97674	68.9655	31.0345
D	1	61.9048	38.0952	74.1935	25.8065	11.8943	88.1057	78.5714	21.4286	20.354	79.646
D	2	93.75	6.25	43.038	56.962	53.9474	46.0526			83.6364	16.3636
D	3	100	0	100	0	100	0	100	0	100	0
D	4	96.1538	3.84615	95.5414	4.4586	92.3077	7.69231	99.0991	0.900901	96.1538	3.84615

## Sheet: xfer6RA
Sp1	Sp2	R1.One	R1.Two	R2.One	R2.Two	R3.One	R3.Two	R4.One	R4.Two	R5.One	R5.Two
1	1	100	0	100	0	100	0	100	0	100	0
1	2	99.6979	0.302115	99.4434	0.556586	98.9011	1.0989	100	0	#VALUE!	#VALUE!
1	3	100	0	100	0	100	0	100	0	100	0
1	4	100	0	99.5992	0.400802	99.5338	0.4662	99.728	0.271985	99.532	0.468019
2	2	100	0	100	0	100	0	100	0	100	0
2	3	99.6255	0.374532	100	0	100	0	99.5	0.5	100	0
2	4	34.4828	65.5172	97.205	2.79503	72.7273	27.2727	34.4828	65.5172	76.0638	23.9362
3	3	100	0	100	0	100	0	100	0	100	0
3	4	3.10559	96.8944	0	100	0	100	0	100	#VALUE!	#VALUE!
4	4	100	0	100	0	100	0	100	0	100	0
A	A	#VALUE!	#VALUE!	100	0	#VALUE!	#VALUE!	100	0	100	0
A	B	0	100	0	100	0	100	0	100	0	100
A	C	0	100	1.2987	98.7013	0	100	#VALUE!	#VALUE!	#VALUE!	#VALUE!
A	D	0	100	0	100	0	100	0	100	0	100
B	B	100	0	100	0	100	0	100	0	100	0
B	C	86.3636	13.6364	88.8889	11.1111	90	10	#VALUE!	#VALUE!	#VALUE!	#VALUE!
B	D	100	0	100	0	100	0	100	0	100	0
C	C	100	0	100	0	100	0	#VALUE!	#VALUE!	#VALUE!	#VALUE!
C	D	28.8462	71.1538	17.3077	82.6923	26.9565	73.0435	#VALUE!	#VALUE!	#VALUE!	#VALUE!
D	D	100	0	100	0	100	0	100	0	100	0
A	1			0	100	0	100	0	100	0	100
A	2	0	100	0	100	0	100	0	100
A	3	100	0	100	0	100	0	100	0	100	0
A	4			96.4187	3.58127	93.8967	6.10329	98.0392	1.96078	74.5763	25.4237
B	1	90.5172	9.48276	93.0851	6.91489	81.6327	18.3673	87.4126	12.5874	93.3333	6.66667
B	2	99.7112	0.288819	98.9209	1.07914	99.5091	0.490912	99.6761	0.323947	99.4475	0.552486
B	3	100	0	100	0	100	0	100	0	100	0
B	4	100	0	99.4431	0.556881	99.1501	0.849858	99.2439	0.756144	99.2439	0.756144
C	1	63.6364	36.3636	46.6667	53.3333	48.1481	51.8519	47.3684	52.6316	38.4615	61.5385
C	2	71.4286	28.5714	80.2139	19.7861	88.8889	11.1111	83.3333	16.6667	71.4286	28.5714
C	3	100	0	100	0	100	0	100	0	100	0
C	4			95.7854	4.21456	95.2381	4.7619	99.2063	0.793651	97.0874	2.91262
D	1			96.1538	3.84615	94.9367	5.06329	81.6327	18.3673	96.1538	3.84615
D	2	100	0	97.4026	2.5974	100	0			100	0
D	3	94.5946	5.40541	93.0233	6.97674	96.1538	3.84615	100	0	85.5263	14.4737
D	4	42.8571	57.1429	47.3684	52.6316	63.6364	36.3636	15.7895	84.2105	25	75

## Sheet: xfer1AA
Sp1	Sp2	R1.One	R1.Two	R2.One	R2.Two	R3.One	R3.Two	R4.One	R4.Two	R5.One	R5.Two
1	1	48400	0	41800	0	25900	0	37300	0	41500	0
1	2	36300	2100	14200	800	8900	100	24500	2200	29600	3500
1	3	50900	500	42300	200	9200	0	22700	200	33600	400
1	4	32400	1400	23500	1500	2700	0	25200	600	31800	800
2	2	2100	0	0	0	5300	0	700	0	1500	0
2	3	3900	100	0	0	2800	300	1700	0	1600	0
2	4	1300	300	800	100	1500	0	2100	600	4900	1200
3	3	300	0	200	0	5600	0	2500	0	300	0
3	4	100	200	0	0	500	2200	800	800	100	600
4	4	3400	0	400	0	1600	0	2900	0	300	0
A	A	7000	0	27000	0	45000	0	13000	0	19000	0
A	B	7000	330000	3000	339000	10000	218000	12000	68000	7000	97000
A	C	14000	259000	25000	258000	16000	101000	0	0	0	0
A	D	45000	54000	25000	67000	37000	43000	17000	57000	7000	40000
B	B	369000	0	449000	0	261000	0	324000	0	98000	0
B	C	324000	56000	358000	39000	202000	40000	0	0	0	0
B	D	305000	1000	438000	4000	363000	3000	361000	3000	159000	1000
C	C	137000	0	158000	0	249000	0	0	0	0	0
C	D	88000	8000	122000	7000	174000	25000	0	0	0	0
D	D	65000	0	57000	0	143000	0	101000	0	99000	0
A	1	30	20000	8	40000	17	8000	5000	10000	44	60000
A	2	0.1	3400	0.2	300	3	800	0	800	3	2200
A	3	145000	0.8	130000	0	45000	0	53000	0	62000	0.6
A	4	17000	200	9000	560	10000	3000	9000	4600	6000	3400
B	1	236000	12000	108000	16000	124000	16000	278000	34000	164000	1400
B	2	139000	2600	121000	2800	130000	3600	145000	6000	137000	10000
B	3	224000	0.6	169000	0	83000	0	191000		237000	0.4
B	4	186000	220	179000	1200	126000	1800	181000	2200	225000	2400
C	1	61000	44000	56000	80000	37000	40000	78000	120000	61000	40000
C	2	36000	16000	35000	20000	34000	6000	80000	40000
C	3	106000	0	107000	1.4	30000	0	103000	0	134000	0.6
C	4	47000	8000	53000	8000	87000	1200	36000	6000	84000	4000
D	1	11000	20000	5000	20000	3000	8000	15000	200000	9000	40000
D	2	13000	1200	7000	6000	9000	1600	135000		6000	1800
D	3	40000	600	44000	420	5000	1800	32000	320	69000	480
D	4	29000	12000	28000	400	20000	4000	28000	2800	16000	3200

## Sheet: xfer3AA
Sp1	Sp2	R1.One	R1.Two	R2.One	R2.Two	R3.One	R3.Two	R4.One	R4.Two	R5.One	R5.Two
1	1	32800	0	39400	0	23400	0		0	43900	0
1	2	36300	1600	43300	4800	20200	300		0	29100	1000
1	3	31500	0	46100	0	28600	0		0	41800	0
1	4		0	49000	1000	6800	0		0	32600	500
2	2	4600	0	1100	0	400	0	600	0	1700	0
2	3	1800	0	800	0	200	0	1100	0	1100	0
2	4	2300	3800	100	500		0	600	100	300	300																														2
3	3	200	0	200	0		0		0	1800	0
3	4	2800	0	400	0		0	200	0	700	0
4	4		0	1200	0	400	0	400	0	1400	0
A	A	8000	0	7000	0	9000	0	8000	0		0
A	B	0	246000	0	296000	0	259000	0	257000	0	298000
A	C	10000	201000	4000	98000	8000	243000
A	D	0	121000	0	130000	0	135000	0	162000	0	165000
B	B	265000	0	261000	0	320000	0	277000	0	301000	0
B	C	231000	34000	245000	27000	285000	28000
B	D	375000	2000	247000	1000	326000	1000	277000	0	341000	2000
C	C	35000	0	208000	0	222000	0
C	D	83000	87000	46000	100000	86000	78000
D	D	151000	0	105000	0	150000	0	138000	0	131000	0
A	1	1	10000	20	22000	4	80000	27	60000	40	2400
A	2	0	2600	0	10000	25	18000	0	12000	0
A	3	90000	0	70000	0	160000	0	110000	0	60000	0
A	4	100000	8000	70000	400	140000	6000	30000	12000	110000	340
B	1	90000	14000	200000	24000	190000	50000	330000	100000	300000	26000
B	2	180000	3800	160000	8000	180000	6000	200000	24000	300000
B	3	100000	0	160000	0	110000	0	320000		220000	0
B	4	220000	3000	150000	260	90000	10000	140000	1200	190000	220
C	1	20000	20000	60000	100000	70000	60000	150000	280000	90000	60000
C	2	8600	4000	13300	10000	40000	14000	40000	14000	10000	22000
C	3	160000	0	150000	0	100000	0	330000	0	200000	0
C	4	50000	1600	9200	8000	40000	6000	80000	6000	40000	18000
D	1	6500	4000	230000	80000	8100	60000	220000	60000	9200	36000
D	2	60000	4000	13600	18000	16400	14000	50000		9200	1800
D	3	60000	0	120000	0	100000	0	13500	0	140000	0
D	4	40000	1600	30000	1400	60000	5000	220000	2000	30000	1200

## Sheet: xfer6AA
Sp1	Sp2	R1.One	R1.Two	R2.One	R2.Two	R3.One	R3.Two	R4.One	R4.Two	R5.One	R5.Two
1	1	38900	0	42000	0	23100	0	105100	0	110000	0
1	2	66000	200	53600	300	27000	300	75300	0	0	0
1	3	38000	0	45700	0	36500	0	66200	0	87600	0
1	4	52700	0	49700	200	42700	200	110000	300	63800	300
2	2	6600	0	7400	0	11700	0	3500	0	5100	0
2	3	3000	0	7100	0	9000	0	1500	0	4800	0
2	4	1000	1900	31300	900	3200	1200	1000	1900	100	1100																															2
3	3	3300	0	2300	0	5800	0	1400	0	400	0
3	4	0	3600	0	3700	0	3100	0	2000	0	800
4	4	1200	0	7400	0	2000	0	4600	0	3900	0
A	A	2000	0	0	0	1000	0	2000	0	0	0
A	B	0	85000	0	187000	0	158000	0	86000	0	167000
A	C	0	78000	2000	152000	0	134000	0	2000	0	0
A	D	0	106000	0	164000	0	122000	0	92000	0	134000
B	B	66000	0	114000	0	153000	0	80000	0	175000	0
B	C	76000	12000	224000	28000	135000	15000	0	0	0	0
B	D	80000	0	164000	0	200000	0	116000	0	241000	0
C	C	104000	0	785000	0	146000	0	0	0	0	0
C	D	30000	74000	18000	86000	31000	84000
D	D	88000	0	124000	0	92000	0	96000	0	105000	0
A	1			0	100000	0	74000	0	60000	0	44000
A	2	0	6000	0	800	0	7200	0	3400	0	4800
A	3	60000	0	30000	0	50000	0	40000	0	22800	0
A	4			70000	2600	40000	2600	60000	1200	17600	6000
B	1	210000	22000	350000	26000	240000	54000	250000	36000	280000	20000
B	2	290000	840	220000	2400	150000	740	240000	780	180000	1000
B	3	330000	0	150000	0	190000	0	170000	0	140000	0
B	4	540000	0	250000	1400	210000	1800	210000	1600	210000	1600
C	1	70000	40000	70000	80000	130000	140000	90000	100000	50000	80000
C	2	20000	8000	30000	7400	20800	2600	80000	16000	30000	12000
C	3	370000	0	160000	0	220000	0	150000	0	100000	0
C	4			50000	2200	40000	2000	100000	800	20000	600
D	1			40000	1600	60000	3200	80000	18000	30000	1200
D	2	21200	0	30000	800	50000	0	50000	0	30000	0
D	3	210000	12000	80000	6000	40000	1600			130000	22000
D	4	60000	80000	90000	100000	140000	80000	15000	80000	20000	60000
