# Supplementary material for: The diversity and function of sourdough starter microbiomes
Source: eLife. 2021 Jan 26;10:e61644. doi: 10.7554/eLife.61644 (PMC7837699; doi:10.7554/eLife.61644)
Supplement: Figure 4—source data 1. [file elife-61644-fig4-data1.xlsx]

## Sheet: Figure 4 - source data 1
	Estimate NMDS 1	fdr p.val NMDS1	Estimate NMDS 2	fdr P.val NMDS2	Estimate dough rise	fdr pval dough rise
Starter taxa
Acetobacter malorum spp. group	0.528206	0.01517	-0.08994	0.938204	-0.26186	0.638109
Acetobacter pasteurianus/pomorum	0.281239	0.453471	-0.33547	0.566457	-0.21926	0.638109
Acetobacter syzygii	0.238239	0.508827	-0.07106	0.938204	-0.24892	0.638109
Komagataeibacter maltaceti	0.159526	0.671307	-0.15953	0.938204	-0.15953	0.832245
Lactobacillus zymae/acidifarinae	-0.18727	0.657279	0.18727	0.906496	-0.0763	0.879788
Lactobacillus brevis	0.111734	0.735392	0.007512	0.97288	-0.41736	0.243361
Lactobacillus coryniformis	-0.25663	0.453471	-0.25663	0.725553	-0.13178	0.832245
Lactobacillus diolivorans	0.048551	0.842689	-0.20114	0.879837	0.228885	0.638109
Lactobacillus cluster 20	0.048551	0.842689	-0.20114	0.879837	0.228885	0.638109
Lactobacillus hammesii/parabrevis	0.090167	0.735392	-0.14565	0.938204	0.062423	0.89097
Lactobacillus caseii spp. Group	0.182786	0.657279	-0.08379	0.938204	-0.10351	0.832245
Lactobacillus paralimentarius	-0.1058	0.735392	-0.10808	0.938204	0.091567	0.832245
Lactobacillus plantarum spp. Group	0.086806	0.735392	-0.14937	0.938204	-0.25652	0.638109
Lactobacillus rossiae	0.193287	0.657279	-0.27165	0.725553	-0.03232	0.966119
Lactobacillus sanfranciscensis	-0.00739	0.963894	-0.03577	0.938204	0.230572	0.638109
Lactobacillus senmaizukei	0.337231	0.366213	-0.10064	0.938204	-0.18279	0.809025
Lactobacillus xianfangensis	-0.11791	0.735392	-0.00694	0.97288	0.090167	0.832245
Pediococcus damnosus/inopanotus	-0.12238	0.735392	-0.04702	0.938204	0.008498	0.966119
Pediococcus parvulus	0.277922	0.453471	0.033968	0.938204	0.117882	0.832245
Leuconostoc cluster 55	0.038929	0.857755	-0.33811	0.566457	-0.17879	0.809025
Wickerhamomyces anomalus	-0.08508	0.735392	0.092604	0.938204	-0.24864	0.638109
Pichia mandshurica	0.18727	0.657279	-0.10404	0.938204	-0.11791	0.832245
Pichia membranifaciens	0.101312	0.735392	0.065226	0.938204	0.141323	0.832245
Issatchenkia orientalis	-0.09551	0.735392	-0.00555	0.97288	0.094861	0.832245
Kazachstania barnettii	-0.03468	0.857755	-0.03468	0.938204	0.006936	0.966119
Kazachstania humilis	0.327783	0.366213	0.03286	0.938204	-0.15362	0.832245
Kazachstania servazzii	-0.11188	0.735392	0.264829	0.725553	-0.01887	0.966119
Kazachstania unispora	-0.16488	0.671307	0.214551	0.879837	-0.09029	0.832245
Naumovozyma castellii	-0.06242	0.827329	0.131782	0.938204	-0.06242	0.89097
Saccharomyces bayanus	0.256629	0.453471	0.090167	0.938204	0.020808	0.966119
Saccharomyces cerevisiae	0.118883	0.735392	-0.14375	0.938204	0.120479	0.832245
Candida sake	-0.31961	0.366213	-0.03027	0.938204	0.016215	0.966119
Saccharomycetales sp.	-0.16729	0.671307	-0.07933	0.938204	0.017565	0.966119

## Sheet: Readme
The relationships between microbial taxa (lactic acid bacteria, acetic acid bacteria, and yeast) and functional outputs. Data include VOC community profiles (non-metric multidimensional scaling NMDS axis scores) and measured rates of dough rise (Spearman's correlations).
