# Supplementary material for: The diversity and function of sourdough starter microbiomes
Source: eLife. 2021 Jan 26;10:e61644. doi: 10.7554/eLife.61644 (PMC7837699; doi:10.7554/eLife.61644)
Supplement: Figure 4—source data 2. [file elife-61644-fig4-data2.xlsx]

## Sheet: Figure 4 - source data 2
Sample	Cluster	Note 1 (Dominant)	Note 2 (Secondary)	Raw expert sensory panel comments
S_507	Blue	acetic.acid.vinegar	green.apple	acetic acid, apple, sweaty, meaty, burnt protein
S_56	Blue	acetic.acid.vinegar	fermented.apple	acetic acid, fermented apple, isovaleric acid, pungent,
S_475	Blue	acetic.acid.vinegar	fermented.fruity	vinegar/acetic sour, fermented/fruity, yeasty
S_118	Blue	acetic.acid.vinegar	fruity	vinegar/acetic sour, fruity, yeasty, v. sl. woody
S_247	Red	acetic.acid.vinegar	fruity.sour	acetic acid, fruity sour
S_199	Blue	acetic.acid.vinegar	musty	acetic acid, musty, meaty sour
S_338	Blue	acetic.acid.vinegar	musty	acetic acid, musty, cheesy, sweaty
S_336	Red	acetic.acid.vinegar	ethyl.acetate	acetic sour, ethyl acetate
S_333	Red	acetic.acid.vinegar	fruity	acetic, fruity, green apple, yeasty
S_441	Red	alcoholic.sour	acetic.acid.vinegar	alcoholic sour, acetic sour, yeasty, fruity sour
S_16	Red	bready	yeasty	bready, yeasty
S_1	Red	cheesy	fecal	cheesy, fecal, fatty acid sour, acetic sour
S_176	Red	ethyl.acetate	acetic.acid.vinegar	ethyl acetate, acetic sour, pungent
S_238	Blue	ethyl.acetate	alcoholic.sour	ethyl acetate, alcoholic sour, fruity sour
S_35	Blue	ethyl.acetate	fruity	ethyl acetate/solvent, fruity, fatty acid sour/sweaty, pungent
S_130	Blue	fermented.apple	acetic.acid.vinegar	fermented apple, acetic sour, meaty sour
S_506	Red	fermented.sour	acetic.acid.vinegar	fermented sour, acetic sour, yeasty
S_321	Red	fermented.sour	acetic.acid.vinegar	fermented sour, acetic sour
S_421	Red	fermented.sour	alcoholic.sour	fermented fruit sour, alcoholic sour, woody
S_120	Red	fermented.sour	autolyzed.yeast	fermented sour, autolyzed yeast
S_243	Red	fermented.sour	green.apple	fermented sour, green apple, yeasty
S_20	Blue	fruity.sour	green.apple	fruity sour, green apple, yeasty
S_156	Red	green.apple	acetic.acid.vinegar	green apple, acetic sour, yeasty
S_542	Red	green.apple	alcoholic.sour	green apple, alcoholic/beer, yeasty, acetic sour
S_373	Red	green.apple	fermented.sour	green apple, fermented sour
S_390	Red	green.apple	fermented.sour	green apple, fermented sour, sl acetic sour
S_122	Red	green.apple	fruity.sour	green apple, fruity sour, yeasty
S_461	Red	green.apple	yeasty	green apple, yeasty
S_521	Blue	sweaty	fecal	sweaty, fecal, ethyl acetate, pungent
S_549	Blue	toasted.corn.chips	rancid	toasted corn chips, rancid, body odor/isovaleric acid
S_446	Blue	veggie.sulfide	fecal	veggie sulfide, fecal
S_24	Blue	winey.sour	acetic.acid.vinegar	winey sour, acetic sour, yeasty
S_385	Red	yeasty	acetic.acid.vinegar	yeasty, acetic sour, fermented fruit, woody
S_154	Blue	yeasty	acetic.acid.vinegar	yeasty, acetic sour, woody aldehyde
S_389	Red	yeasty	acetic.acid.vinegar	yeasty, acetic sour
S_523	Red	yeasty	alcoholic.sour	yeasty, alcoholic sour/beer, acetic sour, woody
S_307	Red	yeasty	brown.fruit	yeasty, brown fruit, acetic sour
S_328	Blue	yeasty	burnt.protein	yeasty, burnt protein
S_323	Red	yeasty	acetic.acid.vinegar	yeasty, acetic sour, woody
S_166	Red	yeasty	meaty.sour	yeasty, meaty sour

## Sheet: Readme
Complete list of sensory panel notes. “Cluster” refers to Bray-Curtis clustering of samples according to their VOC profiles. The colors correspond to the cluster legend in Figure 4. Blue is the left main cluster in Figure 4, and Red is the right main cluster. Starters are ordered by their dominant notes.
