# Supplementary material for: The diversity and function of sourdough starter microbiomes
Source: eLife. 2021 Jan 26;10:e61644. doi: 10.7554/eLife.61644 (PMC7837699; doi:10.7554/eLife.61644)
Supplement: Figure 4—source data 3. [file elife-61644-fig4-data3.xlsx]

## Sheet: Readme
Dough rise data over the course of 36 hours of rise - Doughs were imaged at 2 minute intervals, and data are in pixels, and show changes in height from zero. Data are trimmed- truncated to cut instances where the dough fell to more than 5 percent of its maximum height, and trimmed data are treated as NAs. See materials and methods for conversion of height measurements to mm.

## Sheet: Dough_rise_trimmed
Batch	Cluster	Dough	Rep	Tube	0 min	2 min	4 min	6 min	8 min	10 min	12 min	14 min	16 min	18 min	20 min	22 min	24 min	26 min	28 min	30 min	32 min	34 min	36 min	38 min	40 min	42 min	44 min	46 min	48 min	50 min	52 min	54 min	56 min	58 min	60 min	62 min	64 min	66 min	68 min	70 min	72 min	74 min	76 min	78 min	80 min	82 min	84 min	86 min	88 min
3	7	506	a	1	0	0.788541	0.495133	0.788541	0	0	0	0	0	0	0	0	0	0	0	0	0	0	0	0	0	0	0	0	0	0	0	0	0	0	0	0	0	0	0.537049	0	0.159811	0	8.60837	8.60837	9.25544	9.25544	9.63268	8.92012	9.4231
3	12	446	a	2	0	1.70217	1.0145	1.53025	0.541723	1.48727	1.53025	1.61621	0.326825	0.627682	0.412784	1.05748	0.111927	0	0	0	0	0	0	0	0	0	0	0	0	0	0	0	0	0	0	0	0	0	0	0	0	0	0	0	0	0	0	0	0
3	10	122	a	3	0	0	0	0	0	0	0	0	0	0	0	0	0	0	0	0	0	0	0	0	0	0	0	0	0	0	0	0	0	0	0	0	0	0	0	0	0	0	0	0	0	0	0	0	0
3	9	321	a	4	0	1.64638	1.60481	1.60481	1.23067	0.898104	0.232971	0.0666879	0	0	0	0	0	0	0	0	0	0	0	0	0	0	0	0	0	0	0	0	0	0	0	0	0	0	0	0.357684	0.440825	0.523967	0.0251171	0.648679	0.399254	0.274542	0.523967	0.856533	0.607108
3	4	20	a	5	0	1.23825	1.69899	1.40579	0.0654587	0.316772	0.735627	0.191115	0.526199	0.60997	0.819398	0.651856	1.23825	0.0654587	0.14923	0.191115	0.191115	1.19637	1.1126	1.23825	0.651856	0.98694	1.19637	0.14923	1.28014	0.903169	0.316772	0.60997	0.903169	0	0.0235732	1.23825	0.274886	0.274886	2.8299	0	0	0.651856	0	0.735627	0.568085	0	0.861283	0	0
3	12	16	a	6	0	0	0.0341371	0.505585	0	0	0	0	0	0	0	0	0	0	0	0	0	0	0	0	0	0	0	0	0	0	0	0	0	0	0	0	0	0	0	0	0	0	0	0	0	0	0	0	0
3	7	120	a	7	0	0	0	0	0	0	0	0	0	0	0	0	0	0	0	0	0	0	0	0	0	0	0	0	0	0	0	0	0	0	0	0	0	0	0	0	0	0	0	0	0	0	0	0	0
3	14	336	a	8	0	0	0	0	0	0	0	0	0	0	0	0	0	0	0	0	0	0	0	0	0	0	0	0	0	0	0	0	0	0	0	0	0	0	0	0	0	0	0	0	0	0	0	0	0
3	5	243	a	9	0	0.347517	0.180343	0.13855	0	0	0	0	0	0	0	0	0	0	0	0	0	0	0	0	0	0	0	0	0	0	0	0	0	0	0	0	0	0	0	0	0	0	0	0	0	0	0	0	0
3	12	549	a	10	0	0	0	0	0	0	0	0	0	0	0	0	0	0	0	0	0	0	0	0	0	0	0	0	0	0	0	0	0	0	0	0	0	0	0	0	0	0	0	0	0	0	0	0	0
3	10	461	a	11	0	0.178048	0.721478	0.930489	5.08749	4.8599	4.60909	4.27467	4.10746	4.06566	4.19107	4.19107	4.14926	3.81485	3.89845	3.98205	3.85665	4.19107	4.06566	4.19107	3.81485	4.23287	4.10746	3.60583	4.19107	3.81485	3.85665	3.81485	3.89845	3.94025	3.73124	4.14926	3.85665	3.68944	4.35828	4.27467	4.10746	4.19107	4.14926	4.40008	4.19107	3.98205	4.44188	3.68944	4.06566
3	4	328	a	12	0	0	0	0	0	0	0	0	0	0	0	0	0	0	0	0	0	0	0	0	0	0	0	0	0	0	0	0	0	0	0	0	0	0	0	0	0	0	0	0	0	0	0	0	0
3	0	blank	a	13	0	0	0	0	0	0	0	0	0	0	0	0	0	0	0	0	0	0	0	0	0	0	0	0	0	0	0	0	0	0	0	0	0	0	0	0	0	0	0	0	0	0	0	0	0
3	9	373	a	14	0	0	0	0	0	0	0	0	0	0	0	0	0	0	0	0	0	0	0	0	0	0	0	0	0	0	0	0	0	0	0	0	0	0	0	0	0	0	0	0	0	0	0	0	0
3	12	16	b	15	0	1.8423	1.92544	2.09171	1.96701	1.96701	1.8423	1.80073	1.8423	1.88387	1.88387	1.8423	1.96701	1.75917	1.8423	1.67603	1.63446	1.80073	1.96701	1.75917	1.55132	1.8423	1.92544	1.67603	1.92544	1.88387	1.80073	1.67603	1.80073	1.63446	1.8423	2.05015	1.7176	1.7176	2.5074	1.67603	1.75917	1.80073	1.50976	1.88387	1.88387	1.88387	2.00858	1.67603	1.75917
3	7	506	b	16	0	0	0	0	0	0	0	0	0	0	0	0	0	0	0	0	0	0	0	0	0	0	0	0	0	0	0	0	0	0	0	0	0	0	0	0	0	0	0	0	0	0	0	0	0
3	12	446	b	17	0	1.10481	1.18702	1.26924	1.31035	1.51589	1.22813	1.35146	1.18702	1.39257	1.35146	1.35146	1.63922	0.98148	1.14591	1.18702	1.22813	1.39257	1.43367	1.557	1.35146	1.39257	1.31035	1.26924	1.51589	1.43367	1.10481	1.51589	1.31035	0.98148	1.43367	1.35146	1.31035	1.51589	1.63922	1.14591	1.31035	1.35146	1.14591	1.31035	1.26924	0.940371	1.43367	1.22813	1.18702
3	4	20	b	18	0	0	0	0	0.0395874	0.0817374	0.0817374	0	0	0	0	0	0	0	0	0	0	0	0	0	0	0	0	0	0	0	0	0	0	0	0	0.166038	0	0	0.0395874	0	0	0	0	0	0	0	0.292488	0	0
3	10	122	b	19	0	0	0	0	0	0	0	0	0	0	0	0	0	0	0	0	0	0	0	0	0	0	0	0	0	0	0	0	0	0	0	0	0	0	0	0	0	0	0	0	0	0	0	0	0
3	9	321	b	20	0	0	0	0	0	0	0	0	0	0	0	0	0	0	0	0	0	0	0	0	0	0	0	0	0	0	0	0	0	0	0	0	0	0	0	0	0	0	0	0	0	0	0	0	0
3	5	243	b	21	0	0.745597	0.704799	0.704799	0.786394	0.745597	0.623203	0.541607	0.541607	0.337618	0.337618	0.29682	0.337618	0.133629	0.133629	0.174427	0.174427	0.460012	0.419214	0.664001	0.29682	0.29682	0.460012	0.50081	0.50081	0.419214	0.29682	0.50081	0.582405	0.460012	0.29682	0.582405	0.29682	0.215225	0.541607	0.50081	0.378416	0.582405	0.29682	0.86799	0.908788	0.50081	0.86799	0.419214	0.582405
3	4	328	b	22	0	0	0	0	0	0.131788	0	0	0	0	0.00637117	0.0481767	0	0	0	0	0	0	0	0	0	0	0	0	0	0	0	0	0	0	0	0	0	0	0.549843	0	0	0	0	0	0.00637117	0	0.0899823	0	0
3	0	blank	b	23	0	0	0	0	0	0	0	0	0	0	0	0	0	0	0	0	0	0	0	0	0	0	0	0	0	0	0	0	0	0	0	0	0	0	0	0	0	0	0	0	0	0	0	0	0
3	9	373	b	24	0	0	0	0	0	0	0	0	0	0	0	0	0	0	0	0	0	0	0	0	0	0	0	0	0	0	0	0	0	0	0	0	0	0	0.538948	0	0	0	0	0	0	0	0.830703	0	0
3	10	461	b	25	0	0	0	0	0	0	0	0	0	0	0	0	0	0	0	0	0	0	0	0	0	0	0	0	0	0	0	0	0	0	0	0	0	0	0	0	0	0	0	0	0	0	0	0	0
3	14	336	b	26	0	1.25367	1.2952	1.08751	1.54444	1.37828	1.37828	0.962893	1.12905	1.12905	1.17059	1.25367	1.08751	0.879815	0.838276	0.838276	0.796737	1.21213	1.21213	1.21213	0.67212	0.962893	0.962893	0.422887	1.08751	0.962893	0.67212	1.04597	0.962893	0.630581	0.67212	1.00443	0.547504	0.547504	1.33674	0.67212	0.755198	0.838276	0.713659	1.00443	1.08751	0.879815	1.33674	0.67212	0.755198
3	7	120	b	27	0	0	0	0	0	0	0	0	0	0	0	0	0	0	0	0	0	0	0	0	0	0	0	0	0	0	0	0	0	0	0	0	0	0	0	0	0	0	0	0	0	0	0	0	0
3	12	549	b	28	0	2.06983	2.15276	2.15276	2.19423	2.23569	2.23569	2.06983	1.9869	2.06983	2.02837	2.15276	2.02837	1.9869	1.94544	1.86251	1.77958	2.1113	2.1113	2.15276	1.9869	2.19423	2.15276	1.82105	2.40155	2.02837	1.69665	2.06983	2.06983	1.77958	1.82105	2.23569	1.90397	1.90397	2.31862	1.82105	1.9869	2.06983	1.94544	2.1113	2.06983	1.86251	2.31862	1.82105	1.9869
3	9	373	c	29	0	0.879014	0.838107	1.00174	1.00174	0.919921	1.00174	0.879014	0.960828	0.919921	0.919921	0.756292	0.879014	0.756292	0.510849	0.633571	0.633571	0.879014	0.674478	0.838107	0.674478	0.633571	0.674478	0.674478	0.674478	0.551756	0.592663	0.674478	0.715385	0.551756	0.633571	0.797199	0.715385	0.756292	0.960828	0.756292	0.715385	0.674478	0.756292	0.797199	0.879014	0.592663	0.838107	0.919921	0.797199
3	10	122	c	30	0	0.814582	0.814582	0.77289	1.02304	0.939658	1.2315	0.731198	0.689506	0.731198	0.731198	0.689506	0.77289	0.606122	0.522738	0.647814	0.606122	0.897966	0.731198	0.647814	0.481046	0.856274	0.647814	0.522738	0.814582	0.522738	0.522738	0.731198	0.814582	0.481046	0.731198	0.856274	0.689506	0.522738	1.27319	0.814582	0.856274	0.897966	0.481046	0.897966	0.98135	0.814582	1.02304	0.56443	1.18981
3	9	321	c	31	0	0	0	0	0	0	0	0	0	0	0	0	0	0	0	0	0	0	0	0	0	0	0	0	0	0	0	0	0	0	0	0	0	0	0	0	0	0	0	0	0	0	0	0	0
3	7	120	c	32	0	0.603939	0.603939	0.56303	0.522121	0.481212	0.56303	0.235758	0.317576	0.235758	0.358485	0.358485	0.194849	0	0.15394	0.0312135	0.194849	0.194849	0.358485	0.440303	0.194849	NA	NA	NA	NA	NA	NA	NA	NA	NA	NA	NA	NA	NA	NA	NA	NA	NA	NA	NA	NA	NA	NA	NA	NA
3	12	549	c	33	0	0	0	0	0	0	0	0	0	0	0	0	0	0	0	0	0	0	0	0	0	NA	NA	NA	NA	NA	NA	NA	NA	NA	NA	NA	NA	NA	NA	NA	NA	NA	NA	NA	NA	NA	NA	NA	NA
3	5	243	c	34	0	0	0	0	0	0	0	0	0	0	0	0	0	0	0	0	0	0	0	0	0	0	0	0	0	0	0	0	0	0	0	0	0	0	0	0	0	0	0	0	0	0	0	0	0
3	0	blank	c	35	0	0	0	0	0	0	0	0	0	0	0	0	0	0	0	0	0	0	0	0	0	0	0	0	0	0	0	0	0	0	0	0	0	0	0	0	0	0	0	0	0	0	0	0	0
3	4	328	c	36	0	1.85998	2.02567	1.94282	2.02567	2.10851	1.9014	1.98425	2.19135	2.19135	2.06709	2.31562	2.06709	1.85998	1.65288	1.85998	1.6943	1.6943	2.02567	1.9014	1.73572	1.85998	1.98425	1.73572	2.10851	1.85998	1.57003	2.06709	1.73572	1.28009	2.10851	2.43988	2.02567	1.98425	1.81856	1.85998	1.77714	1.94282	1.77714	2.35704	2.35704	1.57003	2.39846	1.98425	2.10851
3	12	446	c	37	0	0	0	0	0.199803	0.281657	0	0	0	0	0	0	0	0	0	0	0	0.281657	0	0	0	0.117948	0	0	0.199803	0.0360937	0	0	0.158875	0	0	0	0	0	0.486293	0	0	0	0	0	0	0	0	0	0
3	4	20	c	38	0	0	0	0	0	0	0	0	0	0	0	0	0	0	0	0	0	0	0	0	0	0	0	0	0	0	0	0	0	0	0	0	0	0	0	0	0	0	0	0	0	0	0	0	0
3	7	506	c	39	0	1.27529	0.949118	1.19375	1.23452	1.19375	1.15298	1.15298	0.98989	0.98989	1.27529	0.98989	0.98989	0.949118	0.867575	0.826803	0.908347	0.908347	1.03066	1.27529	1.03066	0.867575	0.949118	0.663717	0.74526	1.19375	1.31606	0.908347	0.949118	1.07143	1.27529	0.908347	1.19375	1.03066	0.949118	1.39761	1.19375	1.15298	0.786032	0.826803	0.786032	0.74526	0.98989	0.98989	1.03066
3	12	16	c	40	0	0	0	0	0	0.329972	0.371099	0.124333	0	0	0	0.247716	0	0.165461	0	0.0832054	0.371099	0	0.453355	0.00095005	0	0	0.0832054	0.371099	0.165461	0.494482	0.329972	0.864632	0.700121	0.288844	0	0	0.741248	0.412227	0	0.494482	0.165461	0.329972	0.617865	0	0.0832054	0	0.494482	0	0.165461
3	14	336	c	41	0	0	0	0	0	0	0	0	0	0	0	0	0	0	0	0	0	0	0	0	0	0	0	0	0	0	0	0	0	0	0	0	0	0	0	0	0	0	0	0	0	0	0	0	0
3	10	461	c	42	0	1.09253	0.557851	1.01028	1.54496	1.05141	1.25705	0.722369	0.969146	1.05141	1.01028	1.13366	1.09253	0.434463	0.68124	1.09253	0.804628	1.25705	1.01028	1.33931	1.01028	1.38044	1.58609	0.763499	1.95625	1.29818	0.146557	1.70948	1.75061	1.05141	1.33931	1.79174	0.434463	1.13366	1.99738	1.50383	1.17479	1.21592	0.886887	1.50383	1.75061	1.13366	2.24416	1.91512	2.40868
1	5	475	a	1	0	0	0	0	0	0	0	0	0	0	0	0	0	0	0	0	0	0	0	0	0	0	0	0	0	0	0	0	0	0	0	0	0	0	0	0	0	0	0	0	0	0	0	0	0
1	4	118	a	2	0	1.08955	1.17158	0.925482	1.58176	1.41769	1.4587	1.00752	1.54074	1.04853	0.966499	1.08955	1.00752	0.720396	0.802431	1.04853	0.884465	1.25362	1.37667	1.58176	1.2126	1.2126	1.13057	1.00752	1.29464	1.25362	1.00752	1.17158	1.33565	0.843448	1.08955	1.33565	1.00752	0.925482	1.33565	1.04853	1.25362	1.08955	1.13057	1.33565	1.29464	0.966499	1.25362	0.720396	0.966499
1	4	35	a	3	0	0	0	0	0	0	0	0	0	0	0	0	0	0	0	0	0	0	0	0	0	0	0	0	0	0	0	0	0	0	0	0	0	0	0	0	0	0	0	0	0	0	0	0	0
1	14	542	a	4	0	0.922796	1.05863	0	2.90602	2.86527	5.67711	1.23522	0.039852	0	0	0	0.148522	0	0	3.89764	0.542451	0.515283	0	4.80775	1.42539	0	0	0.257192	1.01788	5.28318	3.99272	5.98953	3.35429	1.35748	2.55285	3.08261	0.814126	1.53406	0	0	0.963547	0	0	0.325111	1.30314	0.230024	0.107771	0	0
1	0	blank	a	5	0	0	0.975366	0	0	0	1.90942	0	1.85447	0	0	3.62642	1.40118	2.22535	2.00557	1.45613	0	0	0	0	0	0	4.69784	0	0	1.49734	0	0	2.1704	0	0	0	0	0	4.13466	4.03851	0	0	0	0	0.233619	0.412187	0.57702	5.04124	0
1	9	307	a	6	0	0	0	0	0	0	0.875881	0	0	0	0	0	0.728085	1.27896	0.150337	0	0	0	0	0.163773	0.298133	0	0.768393	0	0	0	2.08512	2.4882	0.647469	0.660905	0	1.45363	0	0	0	0	0	1.89702	0	0	0	0.660905	2.9719	3.92585	1.09086
1	11	24	a	7	0	0	0.834541	0.739981	0.334724	0	4.17116	5.56254	2.3475	0.915593	1.564	1.02366	1.13173	3.09047	0	0.240164	1.01015	0.983136	0	0	0	0	1.36138	1.28032	0	0	0	0	0.402267	0.0240264	1.13173	4.41432	5.67061	4.34677	0	0	2.05031	4.2387	5.92728	1.564	0	2.3475	1.61804	1.52348	0.199638
1	11	154	a	8	0	0	0	0	3.71232	0	2.68828	1.38799	2.77989	3.06367	3.90151	2.71232	3.98259	2.98259	3.32043	3.72583	4.17178	3.45556	0.631238	0	2.07718	1.36097	1.72583	2.5907	1.92854	2.06367	2.00962	1.19881	0	0	7.11772	2.68828	0.0501568	0	2.92854	2.30691	2.50962	1.90151	2.25286	1.63124	1.7934	2.13124	1.98259	2.38799	1.64475
1	7	323	a	9	0	0	0	2.61739	3.88109	0.236559	1.81542	4.95998	5.34154	1.01283	0	1.8812	1.96015	0.236559	0.907575	0.0392018	1.24966	1.03915	0	4.19687	1.98646	1.34176	2.21013	2.61739	3.23639	7.32827	1.22335	0	0	0	0.302345	1.89436	0.249716	0	1.89436	0.499703	0	0	0	0	0.736532	0	0	0	0
1	14	523	a	10	0	0	0	0	0	1.24571	2.67617	1.12539	0.309895	0	0	1.83394	0	2.65949	6.04511	0	0	0	0	0	0	0	0	0	0	0	0	0	0	0	0.25642	1.94089	11.045	7.97848	0	0	0	0	0	0	0	0	0	0.497058	0
1	9	441	a	11	0	0	0	0	0	0	0	0	0	0	0	0	0	0	0	0	0	0	0	0	0	0	0	0	0	0	0	0	0	0	0	0.22729	0	0.294486	0.0525819	0	0.737977	0	1.03364	0	0	0	0.724537	0	0
1	12	421	a	12	0	0.843683	0	0	0	0	1.13613	1.13613	0.843683	0.418302	0.923442	1.41529	1.70774	1.42858	0.498061	1.04308	1.16272	1.56151	1.2026	1.36212	1.02979	0.777217	0.870269	1.37541	0.405008	1.3887	0.524647	1.52163	0.53794	0.724045	0.710751	0.630992	1.34882	0.232197	1.08296	0.843683	0.498061	0.524647	0.57782	1.06967	1.04308	1.14943	0.750631	0.777217	0.896856
1	10	1	a	13	0	0	0	3.1857	2.51214	4.48485	4.01194	2.94451	3.79575	3.8498	5.09288	3.3904	3.17421	4.47134	NA	NA	NA	NA	NA	NA	NA	NA	NA	NA	NA	NA	NA	NA	NA	NA	NA	NA	NA	NA	NA	NA	NA	NA	NA	NA	NA	NA	NA	NA	NA
1	5	385	a	14	0	0.864476	3.1351	3.20477	2.141	3.00531	2.56651	3.09839	2.51332	3.00531	2.64629	2.91223	2.81915	2.47343	NA	NA	NA	NA	NA	NA	NA	NA	NA	NA	NA	NA	NA	NA	NA	NA	NA	NA	NA	NA	NA	NA	NA	NA	NA	NA	NA	NA	NA	NA	NA
1	7	238	a	15	0	0.0227727	0	0	0	0	0	0	0	0	0	0	0	0	0	0	0	0	0	0	0	0	0	0	0	0	0	0	0	0	0	0	0	0	0	0	0	0	0	0	0	0	0	0	0
1	14	542	b	16	0	0.0445141	0	0	0	0.325259	0.606003	0.285152	0.445578	0.271784	0.458947	0.485684	0.485684	0.458947	0.552528	0.806535	1.36802	1.16749	0.913486	0.378734	0.619372	0.552528	0.458947	0.41884	0.231677	0.271784	0.485684	0.285152	0.565897	0.31189	0.512422	0.686216	0.592635	0.525791	0.726323	0.499053	0.75306	0.405471	0.75306	1.32792	1.23434	0.806535	0.539159	0.64611	0.619372
1	7	238	b	17	0	0.822438	0	0.119899	0	0.822438	0.227982	0	0.0793679	0	0.52521	0.944031	0.592761	0.17394	0.255003	0.471168	0.876479	0.403616	0	0	0	0.0928783	0.309044	0	1.17371	0	0.0253265	0	0.687334	1.32232	0	0	0.16043	0.646803	0.0118162	0	0	0	0	0	0.119899	0.876479	0	0	0
1	11	154	b	18	0	0.569741	0.20157	0.609188	0.4514	0.20157	0.674933	0.635486	1.24034	0.84587	0.71438	0.438251	0.438251	0.674933	0.727529	0.4514	0.188421	0.319911	0.753827	0.71438	0.517145	0.490847	0.569741	0.319911	0.819572	1.0957	1.35868	0.937912	0.635486	0.622337	0.674933	0.832721	1.34553	0.977359	0.0832291	0.503996	0.464549	1.13515	1.21404	0.609188	1.29293	1.01681	0.530294	0.661784	0.648635
1	10	1	b	19	0	0.134338	0.12104	0.280614	0.466785	0.174231	0.400295	0.719444	0	0.613061	0	0	0	0	0.134338	0	0.586465	0	0	0	0	0.360402	0	0.440189	0.785934	0	0.160934	0.652955	0.240721	0	0.174231	0	1.31785	0.599763	0.785934	0.360402	0	0	0	0.267316	0.812529	0.945508	0.0678484	0	0
1	12	421	b	20	0	0	0	0	0	0	0	0	0	0	0	0	0	0	0	0	0	0	0	0	0	0	0	0	0	0	0	0	0	0	0	0	0	0.0922728	0	0.0120635	0	0.399742	0.292796	0	0	0	0	0	0.707211
1	0	blank	b	21	0	0.134185	2.07795	2.2234	2.32918	1.27135	1.5887	1.31102	0.649877	1.80027	1.2978	1.85316	3.34735	2.26307	1.44325	2.42174	1.33747	1.02012	1.50936	2.55397	2.93744	3.77048	2.47464	2.10439	2.64653	2.35563	2.5672	2.23662	1.56226	2.99033	2.96388	3.13578	3.21512	3.36057	4.02171	2.5672	1.81349	1.64159	1.97217	1.87961	3.00355	3.57214	3.10933	2.03828	1.97217
1	4	35	b	22	0	0	0	0	0	0	0	0	0	0	0	0	0	0	0	0	0	0	0	0	0	0	0	0	0	0	0	0	0	0	0	0	0	0	0	0	0	0	0	0	0	0	0	0	0
1	5	385	b	23	0	0.575489	1.90526	2.57014	3.79353	3.16854	4.17916	3.87331	3.08875	3.92651	0.575489	0	2.47706	2.58344	3.06216	1.99834	1.57282	0.615382	1.86536	2.8095	2.70312	3.04886	2.95577	4.21905	3.58077	8.93973	1.94515	1.97175	1.26697	0.522298	1.55952	3.27492	3.71374	4.23235	1.26697	3.07545	3.58077	3.86002	9.1259	3.24832	0	4.97702	3.03556	2.57014	9.1392
1	14	523	b	24	0	0.245445	0	0	0	0	0	0	0	0	0	0	0	0	0	0	0	0	0	0	0	0	0	0	0	0	0	0	0	0	0	0	0	0	0	0	0	0	0	0	0	0	0	0	0
1	7	323	b	25	0	0	0	0	0	0	0	0	0	0	0	0	0	0	0	0	0	0	0	0.108513	0	0	0.0295829	0	0	0	0	0	0	0	0.00327296	0.0822028	0	0	0.0558929	0.00327296	0	0	0	0	0	0.00327296	0	0	0
1	4	118	b	26	0	0	0	0	0	0	0	0	0	0	0	0	0	0	0	0	0	0	0	0	0	0	0	0	0	0	0	0	0.00757238	0.00757238	0	0	0	0	0	0	0	0.100144	0	0	0	0	0	0	0
1	5	475	b	27	0	0	6.73156	6.78101	7.30237	6.80775	6.7008	6.83449	6.67407	6.92806	7.2489	7.40932	6.87459	6.98154	6.80775	6.98154	6.60723	6.79438	6.71417	6.80775	6.9548	6.90133	7.12859	6.88796	7.47616	7.27564	6.90133	6.92806	7.19543	7.66332	7.58311	7.69005	7.46279	7.56974	7.27564	7.18206	6.86122	7.43606	7.26227	7.2088	7.06175	7.19543	6.92806	6.78101	7.30237
1	9	307	b	28	0	0.420085	0	0	3.72688	7.45375	11.1806	3.72688	7.45375	7.72262	7.97261	7.76209	7.72262	7.91998	8.18314	7.84103	7.80156	7.7884	7.90682	7.98577	8.09103	8.02524	7.97261	8.20945	8.18314	8.10419	7.98577	8.01209	8.14366	7.86735	7.93314	7.95945	8.06472	8.01209	7.99893	7.93314	7.99893	7.88051	7.90682	8.05156	7.91998	8.09103	8.09103	7.90682	8.1305
1	9	441	b	29	0	0.371728	2.02057	3.08434	2.95137	3.29709	1.75463	2.06046	1.22274	5.47782	1.06318	1.30253	2.73861	3.89546	4.95923	1.98068	4.26778	5.74376	3.85557	3.09764	1.44879	2.68543	2.91148	3.13753	2.7918	3.54974	3.52315	2.89818	3.31039	2.92477	3.12423	2.99126	2.92477	2.84499	2.97796	3.13753	3.36358	2.83169	3.17742	3.01785	2.55246	3.43007	3.36358	3.11093	3.31039
1	11	24	b	30	0	0	2.64143	2.90597	2.76047	2.64143	2.73402	2.66788	2.60175	2.65465	2.54884	2.64143	2.54884	2.61497	2.97211	3.63348	3.6467	3.48798	4.21548	4.24193	4.08321	3.71284	3.63348	3.59379	3.67316	3.54089	3.69961	3.69961	3.51443	3.62025	3.51443	3.93771	3.76575	3.89802	3.95093	3.65993	3.56734	3.47475	3.60702	3.71284	3.11761	2.70756	2.52238	2.78693	3.22343
1	7	323	c	31	0	0	0.13804	0	0	0	0	0.230144	0.25646	0.0722516	0.0590939	0	0.0854093	0	0.230144	0.124882	0.559087	0	0	0	0	0	0	0	0	0	0.190671	0.545929	0.348564	0	0	0	0	0	0	0.0590939	0	0	0	0	0	0	0	0	0
1	0	blank	c	32	0	0.322024	0	0	0	0	0	0	0	0	0	0	0	0	0	0	0	0	0	0	0	0	0	0	0	0	0	0	0	0	0	0	0	0	0	0	0	0	0	0	0	0	0	0	0
1	7	238	c	33	0	0.845279	0.377392	0.110027	0.404128	0.618019	1.17948	1.67411	1.67411	1.99495	2.142	0.404128	2.26231	1.54043	1.23296	1.20622	0.604651	0.53781	0.497705	1.17948	1.42011	2.28905	1.0458	1.48695	1.94147	1.32654	0.577915	1.16612	1.888	1.86126	2.00831	1.64737	1.43348	1.03243	0.858647	0.377392	1.83453	1.71421	1.79442	1.634	1.888	0.952225	1.46022	0.190236	0.618019
1	5	475	c	34	0	0.248054	0.83693	1.56975	1.55667	1.07248	1.6221	1.70062	1.77913	1.85765	1.70062	1.8053	1.5305	1.36038	1.5305	1.6221	1.55667	1.96234	1.47815	1.67444	1.68753	1.64827	1.47815	2.0016	2.15863	2.32875	1.75296	2.0016	1.75296	1.79222	1.79222	1.56975	1.30803	1.8053	1.72679	1.83148	1.54358	2.27641	2.14554	1.68753	1.76605	1.94925	2.08011	1.79222	1.5305
1	11	154	c	35	0	0	0.44933	0	0.171556	0	0.79324	0.515466	1.07101	0.264147	0	0.780013	2.03661	2.57893	2.20856	3.26675	0	1.00488	0.0392825	0.25092	0.0921918	0	1.33556	1.20329	0.290602	0.608058	0.59483	0.740331	0.621285	0.105419	0.19801	0.753558	1.34879	1.97047	2.11597	1.50752	0.489012	0.224465	0.356738	0.158328	2.32761	1.17683	0.727104	0.700649	0.541921
1	11	24	c	36	0	0.195367	3.33055	3.91839	4.25804	3.98371	3.76163	2.82108	2.96478	3.05622	3.31748	3.1346	3.21298	3.30442	2.92559	3.27829	3.44812	3.74857	4.08822	4.04903	4.24497	3.94452	4.12741	4.16659	4.06209	3.85308	3.98371	4.23191	4.10128	3.8792	3.95758	4.03596	3.90533	3.99677	3.98371	4.33642	3.91839	4.23191	4.28416	3.95758	4.10128	4.04903	3.94452	4.19272	4.03596
1	9	307	c	37	0	0	0	0	0.45343	0.150815	1.00603	0.532373	0.137658	0	0	0	0	0	0	0	0	0.256073	0.874459	0.663945	0	0	0	0	0	0.466587	0.321858	0.519216	0.282387	0	0.0718723	0	0	1.25602	0.571845	0	0	0	0	0	0	0	0	0	0
1	9	441	c	38	0	0	3.09449	3.67034	4.33779	3.64416	3.27771	2.54482	2.75422	2.74113	3.05523	3.6049	3.51329	3.23845	2.68878	3.06832	3.93208	3.97135	3.99752	3.34315	3.05523	3.5002	3.85356	4.04987	3.56564	3.85356	3.19919	2.92436	3.14684	4.06296	4.76968	4.24618	3.7096	3.48711	3.59181	3.90591	2.92436	3.23845	3.56564	3.82739	3.95826	3.6049	3.47403	3.7096	4.40323
1	5	385	c	39	0	0	0	0	0	0	0	0	0	0	0	0	0	0	0	0	0	0	0	0	0	0	0	0	0	0	0	0	0	0	0	0	0	0	2.30482	0	0	0	0	0	0	0	0	0	0
1	4	35	c	40	0	0.33049	4.3482	4.82507	4.72145	4.60487	4.31991	4.44944	3.97019	4.07381	4.42353	4.33287	4.38468	4.55306	4.55306	4.38468	4.15153	4.28106	4.19039	4.20334	4.44944	4.25515	4.56601	4.69554	4.21629	4.65668	4.77326	4.86393	5.05822	5.27841	4.99345	5.48565	4.94164	4.52716	4.17743	4.37172	4.42353	4.19039	4.64373	4.52716	4.60487	4.57897	4.61782	4.59192	5.16184
1	12	421	c	41	0	0	0	0	0	0	0	0	0	0	0	0	0	0	0	0	0	0	0	0	0	0	0	0	0	0	0	0	0	0	0	0	0	0	0	0	0	0	0	0	0	0	0	0	0
1	14	523	c	42	0	0.0689006	0	0	0	0	0	0	0	0	0	0	0	0	0	0	0	0	0	0	0	0	0	0	0	0	0	0	0	0	0	0	0	0	0	0	0	0	0	0	0	0	0	0	0
1	14	542	c	43	0	0	0	0	0.505995	1.35226	0	0	0	1.27292	1.29937	1.0878	0.545664	1.5506	1.18036	0.00352522	1.37871	0	0.572109	0	4.44642	0.0564168	0	1.15392	1.94729	0.34732	0.810121	0.1622	1.57705	1.61672	0.334097	1.18036	0	0	0.545664	1.02169	0	1.53738	0.770453	1.02169	2.5291	1.49771	0	0	0.241537
1	4	118	c	44	0	0.876178	9.61326	8.20855	9.00751	9.3039	9.63895	9.76781	9.57452	9.04617	9.7807	8.83999	9.80647	9.07195	9.3039	8.80133	10.3864	9.85802	9.40699	9.04617	9.18792	9.26524	9.51008	9.80647	9.67761	9.69049	9.72915	10.1544	10.1286	9.72915	9.2137	8.1699	9.31679	7.91217	9.56163	9.99977	10.2446	9.45854	9.25236	10.0127	10.2833	9.94822	9.80647	9.75493	9.81936
1	10	1	c	45	0	0	2.24304	3.25298	3.02707	3.19983	2.89419	5.89743	0.621826	0.170011	0	0	0	0	0.887599	0	1.44572	0	0	6.34924	4.48883	1.57861	0	0	2.74801	1.80452	2.12344	5.10011	4.22305	0	0.58196	0.595248	2.25633	1.19324	3.19983	3.4656	2.25633	5.72467	3.81111	0.98062	0	3.96533	11.896	11.3989	13.4985
2	14	166	a	1	0	2.35062	8.87832	0	0	0	0	0	0	0	0	0	0	0	0	0.347063	0	0	0	0	0	0	0	0	0	0	0	0	0	0	0	0	0	0	0	0	0	0	0	0	0	0	0	0	0
2	10	176	a	2	0	0	0	0	0	0	0	0	0	0	0	0	0	0	0	0	0	0	0	0	0	0	0	0	0	0	0	0	0	0	0	0	0	0	2.47637	1.60892	0	0	0	0	0	0	0	0	0
2	10	130	a	3	0	0	0	0	0	0	0	0	0	0	0	0	0	0	0	0	0	0	0	0	0.0888543	0	0	0	0	0	0	0	0	0	0.101802	0	0	0	0	0	0	0	0	0	0	0	0	0.179488	0
2	0	Blank	a	4	0	0	0	0	0	0	0	0	0	0	0	0	0	0	0.461094	0	0	0	0	0	0	0	0	0	0	0	0	0	0	0	0	0	0	0	0	0	0	1.68763	0.434717	0	0.579791	0	0	0.527036	0.40834
2	11	199	a	5	0	0	0	0	0	0	0	0	0.082359	0	0	0	0	0	0	0	0	0	0.748559	0.799805	0	0	0.261721	0.902297	0.120794	0	0	0	0	0	0	0	0.0439244	0.248909	0.082359	0	0	0	0	0	0	0	0.402647	0.607632	0
2	9	333	a	6	0	0.727338	0.753626	1.06909	0.674761	2.09434	0.398732	0.148991	0	0.0569816	1.22682	0.293578	0.398732	0	0.464453	2.22578	0	1.75259	0.333011	0.556463	0	0	0	0.530174	0.85878	1.35826	0	1.08223	1.35826	0	0	0.963934	1.41084	0.990223	0.595896	0.963934	1.31883	1.39769	0.0832701	0.135847	0.293578	0.359299	0.0175489	0.398732	0.241001
2	12	389	a	7	0	0	0	0	0	0	0	0	0	0	0	0	0	0	0	0	0	0	0	0	0	0	0	0	0	0	0	0	0	0	0.361217	0.895212	0	0	0	0	0	0	0	0	0	0	0	0	0
2	14	156	a	8	0	0.690453	0.456001	0	0	0	0	0	0	0	0.0652491	0	0	0	0.911879	0.521127	0	0	0	0	0	0	0	0	0	0.182475	0.833728	0.234575	0	0	0	0	0	0.2997	0	0.456001	0	0	0	0	0	0	0	0.0782742	1.66733
2	5	247	a	9	0	0.11779	0.466856	0.428071	0	0	0	0	0	0	0.0919336	0.402214	0.350501	0.182432	0.0143634	0	0	0.247074	0.221217	0.195361	0.285859	0	0	0.156575	0.0531485	0.0272918	0	0.234146	0.182432	0.11779	0.156575	0	0	0	0	0.272931	0	0.583212	0.11779	0	0	0.0790052	0.234146	0.234146	0.00143505
2	11	338	a	10	0	0	0	0	0	0	0	0	0	0	0	0	0	0	0	0	0	0	0	0	0	0	0	0	0	0	0	0	0	0	0	0	0	0	0	0	0	0	0	0	0	0	0	0	0
2	7	521	a	11	0	0	0	0	0	0	0	0	0	0	0	0	0	0	0	0	0	0	0	0	0	0	0	0	0	0	0	0	0	0	0	0	0	0	0	0	0	0	0	0	0	0	0	0	0
2	12	390	a	12	0	0.489163	0.657999	0.619037	2.82689	1.17749	1.39828	0.281365	0.424226	0	0.411239	0.372277	0.580075	1.24243	1.19048	1.60608	0.956709	0.00863012	0.138504	0.424226	0.60605	1.08658	0.969697	0.670987	0.567088	0.645012	0.541113	0.463189	0.593062	0.696961	0.372277	1.02165	1.02165	0.567088	0.242403	0.476176	0.567088	0.0605797	0	1.32036	2.81391	0.878785	0.917747	0.25539	0.346302
2	4	507	a	13	0	0	0	0	0	0	0	0	0	0	0	0	0	0	0	0	0	0	0	0	0	0	0	0	0	0	0	0	0	0	0	0	0	0	0	0	0	0	0	0	0	0	0	0	0
2	5	56	a	14	0	0	0.213101	0	0	0	0.134961	0	0.00472748	0	0	0	0	0	0	0	0	0	0	0.0307742	0	0.0437975	0	0	0.213101	0	0.174031	0	0.161008	0	0	0.0437975	0	0	0.0437975	0	0.108914	0	0	0	0.0437975	0	0.252171	0.147984	0
2	11	338	b	15	0	0	0	0	0	0	0	0	0	0	0	0	0	0	0	0	0	0	0	0	0	0	0	0	0	0	0	0	0	0	0	0	0	0	0	0	0	0	0	0	0	0	0	0	0
2	7	521	b	16	0	0.0667774	0.145658	0.0141906	0.0667774	0	0	0.00104385	0	0	0	0	0.0536307	0.198244	0	0.0273373	0.0667774	0.132511	0.0141906	0	0	0	0	0	0	0.382298	0.356005	0	0	0	0	0.0667774	0	0.0536307	0.145658	0	0	0	0	0	0.119364	0	0	0.0536307	0.0799241
2	14	156	b	17	0	0.46998	0.20055	0.41866	0.17489	0.32885	0.29036	0	0.22621	0.31602	0.27753	0.585449	0.43149	0.35451	0.31602	0.136401	0.29036	0.46998	0.31602	0.2647	0.0979106	0.50847	0.21338	0.636769	0.18772	0.110741	0.585449	0.30319	0.27753	0.44432	0.50847	0.2647	0.22621	0.30319	0.31602	0.50847	0.34168	0.2647	0.21338	0.35451	0.49564	0.22621	0.29036	0.572619	0.5213
2	0	Blank	b	18	0	0	0	0	0	0	0	0	0	0	0	0	0	0	0	0	0	0	0	0	0	0	0	0	0	0.114175	0	0	0	0	0	0	0	0	0	0	0	0	0	0	0	0	0	0	0
2	5	247	b	19	0	0	0	0	0	0	0	0	0	0	0	0	0	0	0	0	0	0	0	0	0	0	0	0	0	0	0	0	0	0	0	0	0	0	0	0	0	0	0	0	0	0	0	0	0
2	5	56	b	20	0	0	0	0	0	0.0544821	0	0	0	0	0.0414153	0	0	0	0	0	0	0	0	0	0	0	0	0	0	0	0	0	0	0	0	0.00221482	0	0	0	0	0	0	0	0	0	0	0	0	0
2	9	333	b	21	0	0	0	0	0	0	0	0	0	0	0	0	0	0	0	0	0	0	0	0	0	0	0	0	0	0	0	0	0	0	0	0	0	0	0	0	0	0	0	0	0	0	0	0	0
2	14	166	b	22	0	0.0152351	0	0	0	0	0	0	0	0	0	0.0152351	0	0	0	0	0	0	0	0	0	0	0	0	0	0	0	0	0	0	0	0	0	0	0	0	0	0	0	0	0	0	0	0	0
2	10	130	b	23	0	0	0	0	0	0	0	0	0	0	0	0	0	0	0	0	0	0	0	0	0	0	0	0	0	0	0	0	0	0	0	0	0	0	0	0	0	0	0	0	0	0	0	0	0
2	4	507	b	24	0	0	0	0	0	0	0	0	0	0	0	0	0	0	0	0	0	0	0	0	0	0	0	0	0	0	0	0	0	0	0	0	0	0	0	0	0	0	0	0	0	0	0	0	0
2	10	176	b	25	0	0	0	0	0	0	0	0	0	0	0	0	0	0	0	0	0	0	0	0	0	0	0	0	0	0	0	0	0	0	0	0	0	0	0	0	0	0	0	0	0	0	0	0	0
2	11	199	b	26	0	0	0	0	0	0	0	0	0	0	0	0	0	0	0	0	0	0	0	0	0	0	0	0	0	0	0	0	0	0	0	0	0	0	0	0	0	0	0	0	0	0	0	0	0
2	12	390	b	27	0	0	0.143448	0	0	0.0254809	0.0254809	0	0	0	0	0.0910181	0	0	0	0	0	0.0254809	0	0	0	0	0	0.0516958	0	0	0.13034	0	0	0	0	0	0	0.156555	0	0	0	0	0	0	0	0	0	0.0516958	0
2	12	389	b	28	0	0	0	0	0	0	0	0	0	0	0	0	0	0	0	0	0	0	0	0	0	0	0	0	0	0	0	0	0	0	0	0	0	0	0	0	0	0	0	0	0	0	0	0	0
2	14	156	c	29	0	0	0	0	0	0	0	0	0	0	0	0	0	0	0	0	0	0	0	0	0	0	0	0	0	0	0	0	0	0	0	0	0	0	0	0	0	0	0	0	0	0	0	0	0
2	11	199	c	30	0	0.152991	0.363934	0	0	0	0.0475189	0.100255	0	0.034335	0	0	0.0607029	0.192542	0.126623	0.034335	0.0607029	0	0	0	0.113439	0	0.377118	0	0	0	0	0	0	0	0	0.232094	0	0	0	0.126623	0	0	0.21891	0	0	0	0.0738868	0	0.403486
2	12	390	c	31	0	0	0	0	0	0	0	0	0	0	0	0	0	0	0	0	0	0	0	0	0	0	0	0	0	0	0	0	0	0	0	0	0	0	0	0	0	0	0	0	0	0	0	0	0
2	4	507	c	32	0	0.486606	0.87073	0.552834	0.089236	0.446869	0.327658	0.791256	0.407132	0	0	0.0362534	0.804502	0.049499	0.287921	0	0.00976205	0.0230077	0.420378	0	0.486606	0.367395	0.26143	0	0	0	0	0	0	0	0.00976205	0	0	0	0	0	0	0	0	0	0	0	0	0.0759904	0.248184
2	5	247	c	33	0	0.310842	0	0.323751	0.439925	0.788448	0.4012	0	0.194668	0.246301	0.504466	0.427017	0.4012	0.723907	0.10431	0.0526773	0.439925	0.00104428	0.194668	0	0.168852	0	0	0.039769	0.349567	0	0.220485	0.336659	0.633549	0.297934	0.349567	0.310842	0.323751	0	0	0	0	0.0914021	0	0.168852	0.0914021	0.117219	0.504466	0.336659	0
2	14	166	c	34	0	0.271906	1.56305	0.830959	0.870892	0.551433	0.777716	0.484879	0.0722443	0	0	1.2569	0.937446	0.112177	0	0	0.231974	0.578054	1.85589	0.964067	2.34839	2.76102	0.817649	0.0589335	0	0	0	0.00569036	0.937446	0.817649	0.564744	0.444946	0.378393	0	0.205352	0.897513	0.0190012	0	0	1.6163	0	0.471568	0.617987	0.0190012	0
2	5	56	c	35	0	0	0	0	0	0	0	0	0	0	0	0	0	0	0	0	0	0	0	0	0	0	0	0	0	0	0	0	0	0	0	0	0	0	0	0	0	0	0	0	0	0	0.107662	0	0
2	9	333	c	36	0	0.416984	0.244484	0.536406	0.204676	0.669099	0	0.0719841	0	0	1.23967	0.164869	0.0454457	0.31083	0.164869	0	0	0	0	0.111792	0.0454457	0.589483	1.3591	0.549676	0	0	0	0	0	0.841598	0	0.47006	0	0.363907	0	0.111792	0	0.13833	0.271022	0.907944	1.21314	0	0	0	0
2	10	130	c	37	0	0	0	0	0	0	0	0	0	0	0	0	0	0	0	0	0	0	0	0	0	0	0	0	0	0	0	0	0	0	0	0	0	0	0	0	0	0	0.0423712	0	0	0	0.276036	0.0164084	0.120259
2	12	389	c	38	0	0	0	0	0	0.0303305	0.606396	0.941318	0	0	0	0	0	0	0	0	0	0	0.0437274	0.217887	0	0	1.06189	0	0	0	0.378649	0.0571243	0	0	0	0.392046	0	1.18246	0.00353678	0	0	0	0.325062	0	0	0	0	0	0
2	7	521	c	39	0	0.206371	0	0	0	0	0.232639	0	0	0	0	0	0	0	0.1407	0.00935936	0	0	0	0	0	0	0.0356276	0	0	0	0.0224935	0	0	0	0	0	0	0	0	0.00935936	0	0	0	0	0	0	0	0.101298	0
2	10	176	c	40	0	0	0	0	0.51464	0.159746	1.19814	0	0	0	1.21129	0	0	0	0	0	0	0	0	0	0.054592	1.72391	1.31644	0	0	2.97261	0	0	0	0	0	0.186034	1.31644	0.238611	0.0940247	0.777525	0	0	0	0	0	0	0	0	0.370054
2	11	338	c	41	0	0.333281	0	0	0.437962	0	0	0.241685	0.163174	0	0.0584921	0	0	0	0.189344	0	0	0	0	0	0	0	0.0977476	0.202429	0	0	0.0584921	0	0	0	0	0	0	0	0	0.0454069	0.0323217	0	0	0	0	0	0	0	0.215514
2	0	Blank	c	42	0	0	0	0	0	0	0	0	0	0	0.205392	0.541458	0	0	0.0502845	0	0	0	0	0	0	0	0	0	0	0	0	0	0	0	0	0	0	0	0	0	0	0.787044	0	0	0	0	0	0	0
[truncated: 1,015 more columns]
