# Supplementary material for: The diversity and function of sourdough starter microbiomes
Source: eLife. 2021 Jan 26;10:e61644. doi: 10.7554/eLife.61644 (PMC7837699; doi:10.7554/eLife.61644)
Supplement: Figure 4—source data 4. [file elife-61644-fig4-data4.xlsx]

## Sheet: Readme
Volatile organic compound profiles collected for a subset of 40 starters - All data is inclusive of all replicates (n = 3), while All Data_AVG is averaged across replicates. See materials and methods for more information/

## Sheet: All Data
Compound	118_1	118_2	118_3	35_1	35_2	35_3	507_1	507_2	507_3	20_1	20_2	20_3	328_1	328_2	328_3	475_1	475_2	475_3	385_1	385_2	385_3	56_1	56_2	56_3	247_1	247_2	247_3	243_1	243_2	243_3	323_1	323_2	323_3	238_1	238_2	238_3	521_1	521_2	521_3	506_1	506_2	506_3	120_1	120_2	120_3	307_1	307_3	441_1	441_2
Isopropyl Alcohol																			11.2449	6.01187	4.99198				0.462659	1.78187	0.587891	11.3007	6.02426	7.74842	11.1245	7.333	6.09986	0.333133	0.515206	0.401173				0.979891	6.56979		3.70143	6.8917	2.53081	11.4268	6.16596	10.3013	5.7487
2,3-Butanedione				0.373345	0.416358	0.351553		0.2882	0.0950109	0.0592632	0.0590731	0.0702222				0.869139	0.497023	0.211783	2.23185	0.951111	1.02759	0.138629	0.316581	0.19782	0.376486	0.610647	0.401127	2.19329	1.18854	1.58181	2.25405	0.974965	1.15108	0.306412	0.515746		0.25172		0.533548	0.39295	0.875818		0.799785	1.10875	0.663142	2.30713	1.23086	1.99519	1.09985
Ethyl alcohol	0.324415	0.398899	0.158203	0.482351	0.518727	0.306906	0.628812	0.361308	0.275682							0.388777	0.484772	0.380737	11.3014	6.10318	5.12608	0.296254	0.539127	0.482432	1.23983	2.59156	1.54236	11.4225	6.35782	8.09421	11.513	7.41404	6.2165	0.710562	1.1579	0.81262	0.740496	0.507502	0.735057	1.46793	6.91311	0.506652	4.0241	6.95163	2.83977	11.5433	6.26978	10.3503	5.73374
3-Methylfuran	0.0321342	0.0325502	0.0314836	0.0559716	0.0883867	0.0444102	0.0836633	0.0403443	0.042542	0.0383289	0.0420683	0.0631471	0.0656211	0.0408677	0.0491169	0.054284	0.044228	0.0385443	0.0334056	0.0202421	0.0201519	0.0398971	0.0495303	0.0403111	0.0425743	0.0440978	0.052116	0.0510653	0.0591977	0.0684171	0.022673	0.0183609	0.0185303	0.0361566	0.0356243	0.0493387	0.0353685	0.033218	0.0703305	0.033173	0.0523338	0.061358	0.0328638	0.0538571	0.0394179	0.0408841	0.0370946	0.0300057	0.0186218
2-Propen-1-ol	0.0537446	0.0465258	0.0474154	0.0623384	0.0928131					0.0395956	0.0457293	0.0525844	0.0679712	0.0383692	0.0483692	0.0529801	0.067631	0.0373558	0.046618	0.0404692	0.0332454	0.0465279	0.0577848	0.0412743	0.112219	0.140532	0.0820187	0.0623514	0.0610932	0.083178	0.126187	0.134441	0.0869659	0.0439942	0.0294067	0.0264754					0.0556794	0.041614	0.0744478	0.0742527	0.0616801	0.141364	0.111668	0.094166	0.0847145
2-Methyl-3-buten-2-ol																												0.143474	0.105492	0.0739212
2-Methylfuran	0.0202801	0.0152615	0.0112233	0.017828	0.0153062		0.0918871	0.0423476	0.0455065	0.0250847	0.038947	0.0561098	0.0660567		0.0347676	0.0618146	0.028052	0.0204903	0.0299047	0.0178515	0.0214532	0.0466985	0.0534091	0.0450749	0.0480211	0.0433233	0.035442	0.0327671	0.0588964	0.059951	0.0173175	0.0141271	0.0176729	0.0249521	0.0253274	0.0403412	0.0456014	0.0398635	0.0721819	0.0341042	0.0421152	0.0594621	0.0304064	0.0593414	0.0220218	0.0277571	0.0131134	0.0358338	0.0113567
Ethyl acetate	0.657735	0.923277	0.83773	0.543142	0.737642	0.330904	0.295565	0.580325	0.230083	0.548964	0.196055	0.466823	0.742404	0.839594	0.800272	0.798271	0.710922	0.418877	0.198241	0.171092	0.160818	0.109192	0.11987	0.260512	0.379871	0.639759	0.92816	4.53297	3.40532	3.36434	0.623746	0.709464	0.398545	0.766757	2.68617	1.62205	0.35393	1.32496	0.550504	0.469917	1.61183		0.194746	2.29106	1.38733	1.10832	0.607109	0.695848	0.559127
2-Methyl-1-propanol																			0.29308	0.351792	0.304542				0.26897	0.5811	0.507274	0.701845	0.549545	0.964528	1.09445	1.41867	0.734773	0.167375	0.228559					0.24625	0.385118	0.2966	0.671399	0.73824	0.525129	1.41662	1.03379	0.867476	0.690387
Acetic acid	5.04224	7.32423	6.64936	0.569366	0.707655	5.70855	2.38	1.28937	0.831433	0.486163	0.458045	0.59626	1.04632	0.367781	0.502145	26.7556	13.9411	3.13885	2.05988	0.786292	0.409956	2.86896	5.69511	5.14731	1.68011	1.76556	3.70684	2.32698	1.48297	1.93084	0.493322	0.789957	0.343298	4.65639	7.76335	7.26352	1.38925	0.463745	6.80705	6.39491	3.97435	1.33918	0.615093	2.14532	1.033	2.48032	0.410435	1.39135	0.39541
3-Methylbutanal																			0.0439705	0.0512102	0.0386936							0.0751378	0.0853537	0.0944198	0.151741	0.211641	0.113917										0.096151	0.12707	0.0778175	0.357061	0.247941	0.178715	0.153714
25																				0.017672	0.0155327										0.00958746	0.0166213	0.011617															0.0159684	0.014281
Propanoic acid				0.102514	0.0545704	0.0461807	0.0493029	0.0219018	0.0216275	0.0313675	0.0401626	0.0368858	0.134567	0.0357411	0.0563904	0.0853183	0.116079	0.0857001				0.0209112	0.019366	0.0239369	0.0724903	0.0716235	0.0771271							0.0908999	0.174768	0.0997982							0.0507034	0.109516	0.056952			0.113142
1-Penten-3-ol											0.0777655					0.0387599	0.0341243	0.0471332							0.145016	0.202203	0.138925							0.0561894	0.0352795	0.0349762
2-Methoxy-2-methylbutane				0.0229506	0.0256895	0.0110716							0.0168894	0.0108217	0.0121186	0.0351094	0.0416372	0.0180472	0.0334712	0.0396748	0.0237273							0.030512	0.0203196	0.0224741	0.0304442	0.0389302	0.022732	0.0221937	0.0261131	0.021193										0.0407375	0.0189819	0.0420534	0.0167794
Isobutyl formate																0.198589	0.299156	0.150253				0.0820581	0.0723535	0.144878										0.0818355		0.0938997
3-Pentanone				0.0391812	0.075821	0.0560394				0.0594849	0.0346399	0.0744996				0.0518714	0.0691591	0.0649633							0.123525	0.200428	0.163845							0.0854643		0.0651036													0.0480654
1-Hydroxy-2-propanone	0.44187	0.346632	0.243807	0.361795	0.341754	0.471017	2.76622	0.522622	0.79783	0.359587	1.17498	1.09888	1.21034	0.250994	0.450253	1.66775		0.342634	0.908968	0.179361	0.394582	0.623111	0.431794	0.550429	0.490521	0.353323	0.97063	0.719961	1.49892	1.23239	0.260603	0.259487	0.364345	0.451308	0.858545		0.335217	0.21818	1.6156	0.661873	1.23384	1.68842	0.39652	2.01467	0.410806	0.925117	0.116663	1.30615	0.229048
2,4,4-Trimethyl-1-pentene				0.0430007	0.0705405	0.0470795				0.0651834		0.0572764							0.0744079	0.0909267	0.0691965										0.150618	0.0928281	0.0773185	0.102253	0.0988557	0.0715515										0.1502	0.13791	0.101845	0.109035
3-Hydroxy-2-butanone	64.4742	84.2704	85.7741	97.4851	136.191	78.4541	43.2812	20.6312	24.5187	44.6653	0.902598	13.9814	1.00595	30.273	26.7516	44.6862	66.8664	26.7753	0.0781049	0.403288	0.278808	23.3473	27.1341	37.3813				2.73689	2.53769	3.8491	4.15634	7.64344	0.925	18.2447	13.4435	29.9117	22.3623	8.6832	24.9619	0.921894	2.25348	1.7044	1.51464	2.14071	1.35263	0.305749	2.17541	0.952323	1.09894
Ethyl propanoate																												0.063912	0.0416777	0.0568268
n-Propyl acetate
2-Methyl-1-butanol	0.245946	0.394273	0.266385	0.0474663	0.0982687	0.0535885	0.0308853	0.0542722	0.0323211	0.0288185	0.0402079	0.0292348	0.0236577	0.0311514	0.024238	0.203446	0.478814	0.202599	0.930836	1.09092	1.04125	0.110386	0.139946	0.483849	1.95633	2.75381	2.27103	2.56408	2.27911	3.21073	5.27586	6.118	2.73078	1.24246	2.41988	0.34219	0.184753	0.133198	0.239032	1.56065	2.18498	1.78872	2.18933	2.63765	2.07174	4.6476	3.93048	2.28881	2.81967
3-Methyl-1-butanol	0.192197	0.355358	0.157157	0.0240802	0.0352424	0.03386	0.0335154	0.0820302	0.0405407	0.0266967	0.0440564	0.0342693	0.0277235	0.0289394	0.0219777	0.194058	0.422541	0.29127	4.45275	5.06763	4.97426	0.135425	0.187887	0.589552	6.09209	8.27877	7.30668	8.1286	7.57436	10.0601	17.4633	18.7098	11.5037	1.51531	4.47433	0.394968	0.188242	0.154668	0.251625	5.80715	9.08158	7.03342	11.2581	11.9132	8.9709	14.6313	12.514	10.0674	8.86709
Methyl Isobutyl Ketone																0.0046257	0.00548808	0.00429206
Dimethyl disulfide	0.0159416		0.0350601	0.0314127	0.0246756	0.0188666										0.0252691	0.0114246	0.0165899	0.0103868	0.0263751	0.0102551
2E-Penten-1-al				0.0170614	0.0314561	0.00959264				0.0249824		0.0270331	0.0429583	0.0206322	0.0248608				0.01897	0.0222927	0.0211642																											0.0236895	0.0132911
Ethyl isobutyrate														0														0.182205	0.147712	0.216679	0.088268	0.133065	0.0852855										0.0532584	0.125522	0.102446	0.143207	0.143835	0.0797643	0.0568552
716	0.125074	0.183224	0.170982	0.106976	0.109009	0.13114				0.0901691	0.061857	0.101597	0.0779928	0.0880672	0.0672042		0.224492	0.145047				0.0733222	0.0782653	0.105576										0.126167	0.103686	0.0930603
1-Pentanol																			0.449983	0.52672	0.389824				0.113023	0.170091	0.123148	0.354854	0.345294	0.377079	0.44384	0.448931	0.293407										0.230595	0.314581	0.286688	0.523957	0.423637	0.480667	0.365684
Pyrrole				0.0427635	0.0584378	0.0154429	0.2047	0.0306671	0.0710346		0.0790267	0.0993267	0.123943		0.0830093							0.0522145	0.0235745	0.0397462	0.0454633		0.0920726								0.0604563	0.108439												0.0976459
Isobutyl acetate	0.549974	0.602116	0.867779	0.482776	0.504356	0.411444				0.480679	0.316887	0.551596		0.0972363	0.113764	0.659109	0.665482	0.527599							0.298672	0.439099	0.32809	0.441107	0.33778	0.357642				0.477628	0.487634	0.425398							0.232305	0.252983				0.243151	0.317422
635				0.840824	0.322012	0.436868	0.0817194	0.0829073	0.0885774	1.44906	0.0445869	0.928302		1.5055	0.623677	0.154029	0.105229	0.154579				0.237979	0.605341	0.546764	0.190583	0.118203	0.165685		0.142389	0.213199							0.154939	0.145887	0.164063	1.80748	0.965576	0.970564	0.304152		0.127639
2-Methyl-2-buten-1-ol	0.0157429	0.018026	0.0191671							0.0282108	0.0158772	0.0263264																0.027741	0.023759	0.0263432	0.0189219	0.0219587	0.012077															0.0325193	0.0265587
636		0.15478	0.101364	1.68757	3.68058	2.86241	0.763935	0.11305	0.280225	1.34246		1.18833	0.339523	1.99647	1.47923	0.825729	0.647358	0.452971	0.592416	1.18085	0.824116	0.298189	0.706768	0.618919	0.309068	0.187966	0.366248	0.719943	0.608137	0.717675	0.569367	0.407342	0.173608	0.404694	0.345231	0.544891	0.306321	0.229671	0.8385	3.22306	2.8958	2.73305	0.453937	0.465072	0.265306	0.34415	0.216219	0.646766	0.655419
3-Methyleneheptane	0.0667467	0.0689948	0.0951368	0.062886	0.123819	0.0438107	0.0195431		0.0144677	0.102264	0.0160343	0.0797056	0.109684	0.0770276	0.0635863	0.082253	0.1089	0.0736559	0.0945939	0.146659	0.0957028	0.0152751	0.0256584	0.0215249				0.118158	0.0870842	0.115272	0.141941	0.14766	0.0940319	0.0816686	0.0961505	0.0537462				0.0772298	0.296663			0.0761411	0.0599289	0.149898	0.104213	0.137747	0.0934309
46																			0.0209967	0.0373069	0.0199207				0.0138892	0.0133905	0.0102079				0.020234	0.0126855	0.0158699													0.0128666		0.013478	0.0106008
2-Methylpropanoic acid	0.669143	0.770345	0.964381	0.625109	0.671512	0.762495	0.362443	0.223389	0.158098	0.575659	0.568248	0.601569	0.290068	0.495128	0.321228	1.46616	1.87692	1.25221				0.572433	0.791061	0.664806	0.300126	0.432467	0.437888	0.0165637	0.0141374					1.01134	1.11633	1.09852	0.346817	0.116799	0.484215	0.812331	0.617276	0.734321	0.171016	0.209202
Isoamyl formate																									0.490532	0.663768	0.730799										0.147695	0.0952229	0.109746	0.447887	1.11988	0.644417
717				0.0958158	0.343325	0.29499	0.11907		0.0235399	0.0668643		0.123383	0.0528879	0.200943	0.118398	0.15547	0.100355	0.0886102	0.121183	0.105527	0.0536761	0.0292456	0.0437088	0.0511202	0.0221923	0.0153459	0.02593	0.0950524	0.0566789	0.0443845	0.0310037	0.032636	0.0148737	0.0472806	0.0596239	0.0709347	0.0315241	0.00692976	0.125415	0.176987	0.202895	0.166161	0.0158116	0.0402444	0.0103375			0.0874139	0.031878
Butanoic acid	0.11465	0.0804704	0.0794979	0.0536413	0.0563329	0.0543433	0.0445059	0.0234214	0.0153745	0.0291863	0.0256011	0.0358341	0.0256291	0.027818	0.0224602	0.0850306	0.154734	0.0585106	0.0607786	0.0421916	0.0308227	0.0303846	0.051242	0.0404449	0.0431689	0.0362695	0.0238597	0.179262	0.0617948	0.0472576	0.0680587	0.0468006	0.024351	0.109693	0.0944787	0.0698383	0.0356346	0.0112391	0.0401486	0.0391128	0.0533862	0.0631898	0.0535112	0.0313737	0.0375869	0.075822	0.0222956	0.0448963	0.0365083
2,4-Dimethyl-3-pentanone	0.242095	0.28913	0.31964	0.291097	0.254631	0.244201				0.491024	0.201034	0.499404	0.352955	0.225889	0.319661	0.364056	0.351559	0.276195	0.510571	0.5339	0.435794				0.204993	0.310905	0.262523	0.262523	0.270792	0.292875	0.400367	0.364248	0.302587	0.274367	0.469465	0.37877				0.24807	0.53996	0.270142	0.15989	0.379588	0.211323	0.646738	0.31994	0.644451	0.294279
Ethyl butyrate																									0.0240057	0.0541158	0.0447235	0.0325253	0.0442451	0.0529762	0.0385153	0.0435517	0.0335949
637	0.191252	0.316719	0.178128	0.109748	0.133758	0.166177				0.164787		0.131497		0.0620458	0.0833876	0.390003	0.394155	0.093842	0.05977	0.117055	0.0949764	0.0442071	0.0803787	0.102971	0.153189	0.129492	0.215316	0.978916	0.542206	0.556409	0.427655	0.355272	0.163604	0.367275	0.28508	0.480637	0.13817	0.06553	0.713753	1.27702	1.50203	2.00084	0.150817	0.373482		0.228966	0.149255	0.33829	0.253163
718
2,3-Butanediol	0.0788278	0.123404	0.0807223				0.359771	0.294266	0.141607	0.108365		0.0594416				0.1799	0.211468	0.146664	0.282635	0.255785	0.225139	0.242735	0.347975	0.172783	0.42513	0.562649	0.142988	1.20315	2.16432	1.84653	0.301685	0.402332	0.293534	0.244012	0.229452	0.562304	0.262304	0.242466	0.102565	0.43893	0.721517	0.110246	0.462875	3.17221	2.30027	0.283302	0.222673	0.177022	0.235963
Furfural	0.196559	0.112742	0.0865731	0.228887	0.234076	0.0963917	1.34346	0.308949	0.348654	0.248374	0.425584	0.746667	1.02347	0.159318	0.295014	1.01934	0.174453	0.209435	0.339195	0.075437	0.185594	0.275462	0.281886	0.225216	0.349432	0.172136	0.222142	0.323293	0.856434	0.906747	0.102887	0.0766221	0.178418	0.183336	0.344984	1.39243	0.2218	0.128762	0.89361	0.286218	0.849647	0.792515	0.204926	1.03264	0.202267	0.682612	0.0590415	0.494801	0.0793011
719
724				5.0172	3.55186	2.29666	3.02992	0.369723	1.06691	0.914126		0.241494		0.511367	0.320941							0.0643185	0.108886	0.0380661
725	0.0886083		0.302793	0.176774	0.0997795					0.906834		0.245872		0.509936	0.322111							0.0580683	0.0875311
Ethyl 2-methylbutyrate																												0.0928384															0.0257405	0.0920546	0.0728873
Isovaleric acid	2.01256	2.32877	2.89396	0.248299	0.409483	0.411886	0.698292	0.913816	0.30429	0.537855	0.581443	0.48617	0.19281	0.363307	0.141127	3.13518	3.74964	1.64674	0.0466328	0.0225826	0.015532	1.23003	2.32356	1.71071	0.140419	0.140885	0.373537	0.028625	0.0380245	0.0496977	0.0847435	0.072894	0.0172304	1.48625	0.632951	1.02127	1.42396	0.394509	1.60281	0.788615	0.278475	1.66411	0.0462567	0.0915302	0.0354573	0.0792213	0.0185519	0.0244146	0.0154181
Crotonic acid																												0.0135474	0.0148797	0.0121161		0.00798276	0.00872465										0.0216701		0.0198964
2-Methyl-3-hexanol				0.139396	0.168655	0.0897105				0.357833		0.309701		0.176664	0.186002
2-Methylbutanoic acid	0.114363	0.122854	0.208155	0.191346	0.195118	0.169524	0.10331	0.0990355	0.0781879	0.323107	0.313399	0.27508	0.130695	0.267113	0.190588	0.384698	0.452537	0.266098				0.167255	0.359714	0.171334	0.130375	0.120434	0.133744	0.0479357	0.05371	0.0566101	0.0690977	0.0531283		0.106929	0.116771	0.141329	0.28991	0.177747	0.417024	0.517313	0.209028	0.571811	0.0343549	0.0377188	0.0211928	0.0416635
2-Furanmethanol	0.242546	0.115224	0.0980748	0.236854	0.26507	0.0607495	1.53217	0.389291	0.565929	0.214244	0.798674	0.760175	0.898662	0.144813	0.445498	0.99763	0.205673	0.215358	0.315703	0.0528605	0.17462	0.445117	0.365247	0.350308	0.322396	0.229761	0.334562	0.386006	1.01825	1.03231	0.102119	0.0715572	0.18806	0.152531	0.338973	0.512338	0.301321	0.170736	1.1289	0.471698	0.710104	1.14177	0.263986	1.39342	0.236711	0.204945	0.0538885	0.429063	0.0569203
1-Hexanol	0.19343	0.319357	0.212409	0.105437	0.197764	0.105416	0.10396	0.0819404	0.0589326	0.182132	0.107355	0.183828	0.147538	0.161856	0.110158	0.183935	0.31175	0.196456	4.91361	5.54628	4.55533	0.129986	0.142522	0.32001	1.34067	1.46994	1.54475	2.42106	2.84337	3.15252	3.84015	4.02984	2.87874	0.67251	0.817834	0.377738	0.10833	0.0933145	0.13856	0.606518	1.60633	0.329363	2.87648	3.64778	2.85288	4.28413	4.15314	3.73929	3.65368
Isopentyl acetate	0.21795	0.748478	0.171566					0.0938668	0.0195219							0.363553	0.78429	0.360219	0.037385	0.0553962	0.0457327	0.113372	0.187395	0.808475	0.638749	0.815796	0.844043				0.530206	1.0441	0.370302	0.923617	1.20217	1.31023	0.689657	0.511896	1.00928	0.402018	0.892526	0.123375	0.227631	1.22412	0.938472	0.746822	0.610351	0.646281	0.740287
Dimethyl Sulfoxide				0.0195904	0.0398994	0.0218867				0.00625883	0.00579606	0.00655127	0.0159084	0.00775925	0.00803699													1.64849	1.57817	1.70677				0.0123179	0.013013	0.01266
2-Cyclopentene-1,4-dione	0.0131214	0.0079481	0.00714581	0.0115206	0.0172851	0.0101191	0.0653757	0.0175875	0.0134567	0.0165836	0.0294514	0.0456076	0.0606845		0.0208424	0.0478503	0.0139478	0.0130589				0.014544	0.0176123	0.0122355	0.0240459	0.0139375	0.0169975	0.0239594	0.0587571	0.0718667				0.0117713	0.0187175	0.0246931	0.0195047	0.00886254	0.0466636	0.0290023	0.06352	0.0572782	0.0148812	0.0597512	0.0155236	0.0223537		0.0213952
2-Acetoxy-3-butanone	0.971075	0.635391	2.59136	9.60028	9.11792	3.55386	1.99376	0.546976	1.83016	1.91415		0.535438		1.43028	1.24752	0.145192	0.199277	0.24985				0.116334	0.324124	0.182492	0.086181	0.123173	0.0884176	0.151601	0.134881	0.160729				0.121808		0.336196
Ethyl valerate																												0.0183099	0.0247483	0.0264666	0.0150104	0.0183512	0.00809636											0.0158259	0.0124698
Pentanoic acid	0.429136	0.340949	0.472277	0.104695	0.130771	0.181164	0.0835633	0.106075	0.0469289	0.0305687	0.0209169	0.0285268	0.0220939	0.0895895	0.0295526	0.387685	0.364581	0.17647	0.106091	0.121206	0.0790022	0.104636	0.250774	0.172408	0.101275	0.0861432	0.0628043	0.153475	0.0813707	0.0519875	0.0927056	0.0925472	0.0386432	0.268407	0.197533	0.185587	0.127063	0.0420861	0.123675	0.338625	0.165779	0.289407	0.071757	0.0675849	0.0516251	0.110232	0.0485426	0.063568	0.0452359
2-Heptanol	0.179363	0.198727	0.155339	0.0572698	0.0936423	0.0812123	0.0263143	0.0200525					0.0250495	0.0359389	0.0272567	0.0521899	0.0528533	0.0241856	0.20227	0.226114	0.191713	0.0166942	0.0319547	0.0322027	0.0862081	0.0824527	0.0689125	0.0782517	0.0908311	0.0942933	0.136004	0.14329	0.103515	0.110029	0.11238	0.118398	0.0373568	0.0358018	0.0569762	0.113499	0.110623	0.170489	0.131318	0.108194	0.150185	0.157746	0.165084	0.134971	0.129813
Butyl propanoate	0.0247073	0.0198532	0.022831																0.0389233	0.0586788	0.067094										0.0232609	0.0355386	0.0273429	0.117454	0.0827783	0.0946857							0.0231574		0.0213072	0.0356765	0.130484	0.109017	0.1146
2,5-Dimethylpyrazine	0.130704	0.253141	0.2472	0.171494	0.280648	0.273121											0.0397902	0.0340942	0.0363063	0.045021	0.0411989										0.0304683	0.0387089	0.0238968													0.0673633	0.0506887	0.0407431	0.0353082
Isobutyl isobutyrate
2-Acetylfuran	0.023482	0.0280351	0.0224855	0.0275274	0.0237123	0.0509823	0.076362	0.0239053	0.0208659	0.0291237	0.0390226	0.0576195	0.0721833	0.042249	0.047488	0.0850668	0.0313656	0.022485	0.0256498	0.0316713	0.0183964	0.0184424	0.0212274	0.0129681	0.0267512	0.0186647	0.0249342	0.0442725	0.0541654	0.0726343	0.0366836	0.0335039	0.0330865	0.0209663	0.0304145	0.0800613	0.0249856	0.0173675	0.0539736	0.0321112	0.054768	0.0797999	0.0323066	0.0911888	0.0370885	0.0331251	0.0117644	0.0385896	0.0153145
Amyl acetate	0.0176116	0.0283828	0.0216439													0.0253526	0.0291798	0.0191089	0.0282445	0.0286701	0.026019	0.0111931	0.0150609	0.0142674	0.0237114	0.0311926	0.0257026	0.0576489	0.061601	0.0636334	0.0261874	0.0326215	0.0219094	0.0256707	0.0281657	0.0325628	0.0185915	0.0173846	0.0214693	0.0205146	0.0441014	0.0216806	0.0159108	0.0201738	0.0380704	0.0425465	0.0359911	0.0366234	0.0367959
720	0.0599834	0.0663875	0.0855669	0.0554888	0.0719477	0.0504652	0.0674214	0.0488193	0.0472203	0.120947	0.051762	0.124562	0.105828	0.0999933	0.091853	0.0838366	0.0782272	0.0646183	0.082937	0.097874	0.0795604	0.042116	0.0551524	0.0539879	0.0713457	0.0935272	0.0594753	0.0751657	0.0918734	0.110321	0.0951211	0.0733591	0.0564204	0.0720315	0.0743929	0.05272	0.0463863	0.0478881	0.0484142	0.0643441	0.107525	0.0589439	0.0309035	0.0407905	0.0437508	0.088152	0.0759861	0.077533	0.0691184
2(5H)-Furanone	0.187912	0.120991	0.116633	0.1687	0.186572	0.0674581	0.81456	0.156535	0.171371	0.174011	0.260624	0.344535	0.381314	0.0823121	0.153407	0.679192	0.158315	0.112047	0.22213	0.101828	0.103172	0.151986	0.129694	0.127034	0.162413	0.170821	0.224311	0.230516	0.441593	0.465658	0.0904133	0.0901479	0.0968319	0.123415	0.168511	0.428288	0.138924	0.0748954	0.463628	0.199921	0.263203	0.486176	0.118419	0.615878	0.158886	0.216608	0.0567684	0.28536	0.064791
710	0.0819676	0.0342798	0.0138875	0.0384579	0.049658	0.0162339	0.597306	0.0442249	0.11845	0.0259642	0.196622	0.188457	0.257752	0.0301746	0.0434028	0.617407	0.0689398	0.0696125	0.101988		0.029193	0.0501636	0.050098	0.0472431	0.0442445	0.0310565	0.0973279		0.341139	0.316282	0.0189635	0.0164752	0.0408131	0.0374288	0.0692977	0.303489	0.0347827		0.421232		0.246303	0.329717	0.0287474	0.422897		0.100563		0.260939
324	0.0591419	0.0378408	0.0209715	0.040679	0.0343942	0.0157292	0.431901	0.0939852	0.0995368		0.149777	0.138725										0.0831744	0.0702082	0.0535874	0.117754	0.103992	0.171013		0.197342	0.254213							0.0686635	0.0364962	0.183839	0.124021	0.252681	0.146622	0.057057	0.388631	0.0580513
N,N-Diethylformamide	0.0110755	0.0158498	0.0165443	0.0115734	0.0190546	0.0176162	0.00786906	0.00631725	0.00571606	0.014729	0.0113305	0.00917101	0.01906	0.0142851	0.0159299		0.0206245	0.0187704	0.0246135	0.0314857	0.0285591	0.00397543	0.00318501	0.00551245	0.00619037	0.00673317	0.00508238	0.0108522	0.0116694	0.0152025	0.0206999	0.0195445	0.0183402	0.0204008	0.0204759	0.0161639	0.00377415	0.00521185	0.00646691	0.0115841	0.0132187	0.0103341	0.00914394	0.0159302	0.0126096	0.023643	0.0251668	0.0208351	0.0184709
1,2-Cyclopentanedione							0.634403	0.154032	0.194161		0.354251	0.318219	0.340456		0.135675	0.651093	0.127845	0.0982841				0.168496	0.108609	0.114887	0.131205		0.266784	0.164029	0.432204	0.493303					0.181292	0.406056	0.128104		0.524635	0.24063	0.359645	0.729885	0.130625	0.764172	0.0919065
2-Hydroxy-2-cyclopenten-1-one	0.1344	0.0623197		0.0831122	0.0665471		0.615902	0.135246	0.185853		0.330782	0.310224	0.340456		0.123569	0.641969	0.121837	0.0881164	0.120607		0.0522857	0.164287	0.0996348	0.107634	0.131205		0.266784	0.164029	0.432204	0.481496				0.0488667	0.162392	0.396219	0.124227		0.509774	0.222685	0.370645	0.708296	0.119428	0.764172	0.0860365
643	0.174657	0.226094	0.256609	0.196567	0.304864	0.198232	0.248854	0.220051	0.186941	0.473189	0.124736	0.436193	0.456713	0.426132	0.380324				0.221583	0.297164	0.256593	0.164569	0.226868	0.225641	0.276327	0.357207	0.227268	0.39509	0.452532	0.524661	0.267547	0.259441	0.190504	0.264508	0.20921	0.174732	0.18891	0.133638	0.219604	0.273811	0.47112	0.112903	0.121651	0.550263	0.444703	0.279255	0.268413	0.242184	0.228355
Isobutyl butyrate				0.00517982	0.0200741	0.0201038	0.036692	0.02522					0.0227837		0.0153232							0.0193973	0.0214353		0.0307637	0.0275098											0.0131017	0.0132868
5-Methylfurfural	0.0123008	0.00750025	0.0070407	0.0166567	0.0177449	0.0196911	0.0966834	0.0176277	0.0167438	0.020389	0.0309319	0.0611781	0.0768892		0.0236719	0.082381	0.0111541	0.0140615	0.0188668	0.0114144	0.010786	0.0176992	0.0208123	0.0121468	0.0254273	0.00924559	0.00899431	0.028226	0.0679624	0.0766318	0.00722067	0.00639588	0.0131903	0.0138992	0.0276531	0.0706949	0.0137374	0.00666994	0.0484253	0.0536059	0.0659773	0.0780222	0.0202806	0.0822438	0.0229128	0.0405854		0.0392564
Dimethyl trisulfide	0.00673094	0.00748996	0.0135645	0.0112622	0.0329111		0.0230126	0.0170651	0.00646298							0.00722766	0.0106025	0.00563058	0.0188523	0.00889082	0.00859404	0.0259219	0.0314467	0.00905461																0.0150899		0.0120934						0.0120361	0.00942056
365																									0.0239917	0.05116					0.0138663	0.0233393	0.0115109				0.017655	0.0212673
2,2,3,5-Tetramethylheptane	2.58324	3.63094	3.83983	2.8286	4.31165	3.07501	3.47142	3.61563	3.19124	6.46753	2.16233	5.62212	5.4043	5.40922	5.02098	2.36087	3.1339	2.80364	3.3587	4.43866	3.95632	2.80381	3.84999	3.87813	4.12442	5.2593	3.7362	4.97884	5.67055	6.66956	4.25591	4.05381	3.01143	3.68437	3.15972	2.49992	2.98133	2.25604	3.59012	3.98772	5.53266	2.28656	2.29357	7.22977	6.09984	4.18211	4.26908	3.53479	3.49753
Heptanol																			0.216226	0.308292	0.246833				0.381665	0.433921	0.442935	0.263551	0.213126	0.226715	0.255878	0.335793	0.201685	0.124183	0.127836	0.12395							0.257834	0.244854	0.249693	0.384764	0.407218	0.275437	0.259323
385	0.248914	0.290801	0.258122																0.276704	0.409948	0.362232													0.261058	0.326403	0.267019										0.477194	0.440098
Ethyl 3-ethoxypropionate
3-Ethyl-3-methylheptane	0.634846	0.74259	0.849005	0.600447	0.939572	0.687922	0.687364	0.895173	0.753798	1.45117	0.453304	0.931498	1.1582	0.748682	1.08487	0.346991	0.764821	0.691917	0.784222	0.986365	0.933122	0.685619	0.756373	0.909204	0.814036	0.855453	0.823987	1.19596	1.13708	1.33541	1.00287	0.88025	0.715891	0.959757	0.755199	0.593997	0.427212	0.347472	0.777768	0.674399	1.07362	0.350717	0.484967	1.35226	0.935867	0.969824	0.999521	0.775587	0.881556
2,2,6,6-Tetramethylheptane	3.00418	4.21996	4.33104	3.13786	4.71607	3.4775	3.63542	3.8281	3.29108	6.43084	2.32734	5.60811	5.46344	5.62803	5.14557	2.57698	3.4778	3.16992	3.71019	4.81366	4.39889	2.84243	4.07221	4.08104	4.30259	5.28646	3.7559	4.9488	5.751	6.70724	4.4663	4.38773	3.2259	4.17012	3.39366	2.85022	3.08299	2.43363	3.8074	4.26724	5.6067	2.84037	2.63089	7.37775	6.23018	4.46389	4.57945	3.73055	3.75377
Hexanoic acid	1.50296	1.61374	2.13378	0.518192	0.765405	0.951623	0.253665	0.35796	0.338361	0.0982366	0.0706773	0.0882983	0.13434	0.365923	0.241798	2.00028	1.58644	1.26403	0.610867	1.22064	0.854991	0.272357	0.275311	1.04435	0.60547	0.572965	0.987953	0.14389	0.187581		0.382478	0.486502	0.306815	1.26096	1.10266	0.92811	0.225888	0.280559	0.478837	1.25343	0.747924	0.890145	0.198255	0.280922	0.177872	0.335658	0.49125	0.323107	0.272023
2-Pentylfuran	0.507412	0.548143	0.665967	0.543061	0.954327	0.51622	0.135612	0.286576	0.143635	0.184268	0.195116	0.172938	0.24437	0.209419	0.185949	0.159029	0.334318	0.161999	0.210144	0.253496	0.213894	0.116444	0.192792	0.263922	0.272628	0.336152	0.295274	0.191816	0.183983	0.219856	0.245776	0.386388	0.162413	0.220552	0.186894	0.295656	0.238151	0.255077	0.280068	0.154785	0.210119	0.310727	0.144973	0.170255	0.135944	0.386587	0.250781	0.177913	0.170053
Ethyl hexanoate	0.0249538	0.0578164	0.0380622				0.0999387	0.136373	0.033159							0.0407389	0.0957811	0.0355552	0.0217333	0.0366248	0.0758221	0.0783079	0.156365	0.123269	1.1849	1.07442	1.72173	0.667295	0.831251	0.955917	0.563036	0.769987	0.35333	0.132781	0.172412	0.0721463	0.510631	0.274617	0.496557	1.58065	2.568	0.297775	0.110892	0.560337	0.483523	0.371518	0.344597	0.241453	0.265511
2,4,6-Trimethylpyridine							0.598743	0.756348	0.0442815	0.0423765		0.0364569	0.0149848	0.0116125	0.0215338		0.0149636	0.0124429	0.0134575	0.0196823	0.0142475	0.464001	0.981171	0.0496097	0.887833	0.901137	0.0451552	0.0136817	0.0109206	0.017914	0.013466	0.0150529	0.00983189	0.0166253	0.0115291		0.764459	0.998636	0.0398174	0.027354	0.0130813	0.0445855	0.042826	0.0184735	0.0273443	0.015889	0.0165878	0.0148515	0.0147964
2-Ethyl-5-methylpyrazine
Ethyl (E)-3-hexenoate
Ethyl (Z)-3-hexenoate
2,2,7,7-Tetramethyloctane	4.81528	6.86165	7.01697	5.30555	8.03315	6.25326	5.09129	5.76882	4.78389	9.30328	4.30376	7.90319	7.71802	7.96272	7.38006	4.36134	5.88635	5.42551	6.15577	8.14898	7.53728	4.27856	4.83453	5.96322	5.50885	6.79268	5.27871	6.82091	8.05916	9.29998	7.64234	7.39192	5.47629	7.09332	5.80058	4.81641	4.03566	3.58496	5.30704	6.20342	7.35067	4.646	4.63263	10.1046	8.681	7.56429	7.90933	6.29788	6.3767
Hexyl acetate																													0.11413	0.124927
605	13.3155	19.1695	18.6778	13.9991	21.6031	17.6371	15.4293	17.8402	14.7028	22.902	12.3106	18.8269	16.8901	17.2062	16.5725	12.0057	16.6249	14.9692	16.7619	20.6857	20.5874	12.6966	18.4637	17.8171	18.9974	21.5213	15.9338	15.1785	18.4111	22.3273	20.3005	19.8026	14.8126	19.9277	16.0413	13.5572	14.3258	12.1689	16.7005	15.7756	17.4162	12.9666	12.709	22.2082	19.6624	19.682	21.1757	10.0373	7.8034
Benzyl Alcohol	0.0367283	0.0463527	0.0399246	0.0104113	0.0189608	0.0257159	0.0121036	0.0130321	0.00532118	0.00861596	0.00756075	0.00784302	0.00560666	0.00966335	0.00877706	0.0360034	0.0357798	0.0302991	0.073226	0.134025	0.104963	0.0182661	0.0267093	0.0256467	0.101582	0.0900532	0.0896332	0.0609103	0.0894455	0.0996792	0.087387	0.0826105	0.0512599	0.051423	0.0413545	0.0490347	0.0353607	0.040928	0.0488211	0.13958	0.161535	0.201684	0.0969545	0.0985613	0.0730122	0.105472	0.0940679	0.0846438	0.0810911
Benzeneacetaldehyde	0.0603459	0.0992737	0.0692874	0.0529845	0.0821704	0.0685239	0.0457879	0.0417374	0.0338029	0.0695244	0.0741777	0.0674021	0.0667925	0.0573094	0.0559848	0.0592104	0.074175	0.063435	0.0939295	0.072174	0.0724522	0.0425261	0.0825892	0.0759231	0.0823599	0.0668893	0.053632	0.137863	0.14601	0.129949	0.269413	0.248644	0.136574	0.117349	0.0832197	0.0980217	0.0345843	0.0684442	0.048627	0.0673331	0.062942	0.116327	0.195062	0.103229	0.140394	0.238476	0.225505	0.145448	0.198858
Ethyl 2-hexenoate
Heptanoic acid	0.050199	0.0541437	0.0743767	0.0190128	0.0344738	0.0408512							0.02116	0.0204497		0.0860944	0.0955388	0.0519617	0.0344006	0.056931	0.0415258	0.0162844	0.0389278	0.0333482				0.0401475	0.0224842	0.0157476	0.0296571	0.0261487	0.0165416	0.0541917	0.0437533	0.049005				0.0709334	0.0633049	0.0845963	0.0230899		0.0170561	0.0374995		0.0245384	0.0149944
Tetramethylpyrazine				0.0125166	0.0209191	0.0252818
Ethyl heptanoate	0.00410259	0.0106858	0.00426637																			0.011431	0.0228603	0.0243653	0.169285	0.138174	0.181194	0.172037	0.224101	0.253319	0.134007	0.183536	0.0960906	0.036301	0.0488093	0.0176526	0.0573572	0.0304582	0.0648374	0.135289	0.174279	0.0420598	0.0292063	0.156108	0.13182	0.100182	0.0924191	0.0577415	0.0656659
Phenylethyl Alcohol	0.609259	1.16336	0.30546	0.137377	0.218423	0.217769	0.145108	0.658525	0.118326	0.646407	0.921753	0.658531	0.146599	0.0510888	0.0535489	4.34793	4.48064	3.55344	0.357205	0.838018	0.492965	7.93083	17.233	12.9511	20.249	21.2207	23.2327	33.3771	42.4283	57.9767	51.0705	47.3415	17.9889	10.0849	9.68634	2.68164	6.00705	5.09155	6.82677	19.6329	24.2685	28.1868	41.4908	52.2776	40.3809	26.2476	19.4538	18.0512	23.5805
640	0.0257526	0.0483851	0.0137338				0.0169793	0.0350135		0.0313898	0.0396779	0.0291947				0.167905	0.175993	0.138591		0.0327037	0.0233955	0.331569	0.71306	0.0532224	0.822993	0.883486	0.0920165	1.38851	1.7289	2.37551	1.95119	1.83123	0.691983	0.387125	0.37636	0.105484	0.254752	0.216444	0.277849	0.80262	0.98563	1.14114	1.70353	2.11041	1.63546	1.00867	0.735922	0.694051	0.929532
Isobutyl hexanoate
1-Phenyl-1,2-propanedione																												0.0362107	0.0538975	0.0429617										0.095651	0.0935295	0.136517
Benzyl acetate	0.00640302	0.00743417	0.0150131				0.0173914	0.0342241	0.0162581							0.00813481	0.00682637	0.00739653	0.00698729	0.0185033	0.0183186		0.00855506	0.0039731	0.0132751	0.0112804	0.0133721	0.00817779	0.0115574	0.0116851	0.00622748	0.00739845	0.00539347	0.00929684	0.00766399	0.0131273		0.00837015	0.0225602	0.00484496	0.00705449	0.00574553	0.00542992	0.0101482	0.00807736	0.00888236	0.00931156	0.00521871	0.00584864
Ethyl benzoate										0.0156848		0.0198861	0.0369571	0.0277511	0.0278052				0.0205478	0.0277837	0.0271281																											0.0145658	0.0116845
Benzenecarboxylic acid	0.0294134	0.0330324	0.032487	0.0250807	0.0293337	0.0305921	0.0657678	0.0382723	0.0211433	0.0337495	0.0261034	0.0279813	0.0473037	0.035909	0.0355099	0.0817373	0.0635268	0.0370619	0.0331684	0.0312298	0.0285826	0.0314515	0.0479219	0.0367529	0.0553642	0.0423527	0.0567752	0.0870377	0.129214	0.118742	0.0297376	0.0268738	0.034711	0.0408144	0.0348624	0.0983177	0.0368999		0.0676991	0.109733	0.133744	0.166278	0.0546538	0.137324	0.0693836	0.0507463	0.0408478	0.0362728	0.0241982
Octanoic acid	0.0799324	0.0444333	0.0670329	0.0270708	0.0428691	0.0403463	0.0332071	0.0919598	0.0567287	0.0379713	0.0532315	0.0713815	0.0717399	0.042807	0.0338995	0.089743	0.0950422	0.0854829	0.0732741	0.0596617	0.041529	0.0734683	0.0683689	0.101005	0.0942278	0.0566837	0.0451829	0.14054	0.154714	0.173083	0.042246	0.0518673	0.0441094	0.0989781	0.112446	0.071927	0.076156	0.033107	0.0724451	0.095106	0.113319	0.100113	0.0709395	0.137325	0.0769326	0.0925077	0.0421724	0.111677	0.0339434
Phenylethyl alcohol, formate																									0.381622	0.375481	0.41948		0.0547935	0.0654391	0.0277761	0.0345534	0.0256282				0.146542	0.100257	0.127776	0.096482	0.202665	0.153785						0.022854	0.0126562
Ethyl octanoate	0.022534	0.0521374	0.0220091	0.00550969	0.00787694	0.00808037	0.0228953	0.0380309	0.0150022	0.0114409		0.00888501				0.04908	0.117547	0.0384653	0.0121756	0.0258477	0.0322503	0.0763694	0.13687	0.141682	0.375328	0.353218	0.485531	1.13643	1.49975	1.99103	0.818889	1.15537	0.677602	0.317962	0.399666	0.172411	0.284035	0.154614	0.349332	0.108636	0.304748	0.0606707	0.217911	1.50858	1.3057	1.04791	0.879133	0.467707	0.496019
651	0.71447	1.12377	0.804935	0.619962	0.985933	1.57991	0.535255	1.21011	1.02396	0.718013	0.495904	0.489132	0.674323	0.728174	0.957893	0.56425	1.18583	1.06964	1.28972	1.90647	1.79079	1.07723	0.895708	0.723942	1.13194	1.01462	0.916913	0.606724	0.68929	0.476185	1.60301	1.56958	1.15136	1.58071	1.15944	1.26524	0.781281	1.19482	1.01672	0.524733	0.581807	0.553158	0.382901	0.589969	0.462929	2.11486	2.35358	1.73625	1.41043
2-Phenoxyethanol	0.0206908	0.0300027	0.0405093				0.00723456	0.0096897	0.00974185							0.0083076		0.0184367	0.00806984	0.0210499	0.0288836	0.00393621	0.0075005	0.0067047	0.012146	0.00661146	0.013727	0.00357417	0.00493573	0.00976312	0.00678662	0.00484348	0.0169371	0.01358	0.0209595	0.0223519		0.00850441	0.00989803							0.0073216	0.0206375	0.0113316	0.00624156
Isopentyl hexanoate
1,3-Di-tert-butylbenzene	19.8845	30.1689	28.1568	21.8631	37.2552	35.749	22.6662	30.6785	23.335	40.7431	32.9147	33.6519	32.6499	35.3633	33.885	22.0401	34.1189	33.4928	32.4325	48.3813	44.7514	21.5839	28.4978	27.0176	28.435	27.9359	25.606	27.9392	35.0074	41.0329	34.8344	37.7031	29.6278	36.2949	35.5241	26.8303	23.4016	24.1218	28.5936	30.0159	28.8679	34.8181	37.5427	41.8148	39.645	38.1395	44.4793	32.8478	36.4411
Phenylethyl acetate																0.10053	0.0733284	0.121797	0.150371	0.785204	0.706109		0.774124	0.149093	0.140544	0.085925	0.128873	0.763102	0.989586	1.34286	0.125691	0.234576	0.0619785	0.135221	0.123048	0.220122				0.0956372	0.22565			0.867566	0.744324	0.235444	0.188157
Nonanoic acid	0.0207559	0.0181719	0.0257475	0.0168451	0.0198719	0.0168512	0.0676466	0.0810848	0.028692	0.0303625	0.0299185	0.0428699	0.0426688	0.0337607	0.0281645	0.0705695	0.0467436	0.0413453	0.0270696	0.0396335	0.0231463	0.0630913	0.064076	0.0314645	0.0711087	0.0883772	0.0290785	0.0431838	0.0625247	0.0539193	0.0117983	0.0152188	0.01028	0.0473169	0.0309816	0.0710784	0.0388168	0.0540628	0.0479847	0.0455049	0.054918	0.0702026	0.0507162	0.0653083	0.0399811	0.0278541	0.013064	0.024648	0.0172748
4-Ethyl-2-methoxyphenol																									0.0182215	0.0202324	0.0145771		0.0251974	0.0280437							0.0136755		0.0187589		0.0181575	0.0231033
661	0.661118	1.05294	0.732203	0.71594	0.8609	1.14318	0.57475	0.751171	0.545998	0.711084	0.726606	0.613826	0.613591	0.684496	0.699217	0.549819	0.732913	0.726581	0.871552	1.0756	1.05757	0.451252	0.672551	0.701449	0.658397	0.663058	0.566188	0.563016	0.605966	0.75994	0.893138	0.990295	0.814902	1.03794	0.70874	0.824098	0.478893	0.588029	0.654323	0.601869	0.549353	0.623173	0.72664	0.678448	0.712304	0.884677	1.01452	0.725607	0.86484
Indole	0.0159434	0.0150891	0.0110698	0.0213744	0.0195738	0.018888	0.0644373	0.011734	0.0252273	0.0176908	0.0356176	0.0432352	0.0477732	0.00951189	0.0182991	0.0634579	0.023189	0.0294045	0.0252294	0.0123207	0.0200404	0.0152511	0.0144855	0.0160088	0.0141035	0.0117046	0.0464362	0.0529001	0.0760919	0.0759657	0.0287658	0.0312806	0.0216418	0.0174407	0.0260398	0.0823232	0.0244103	0.0100378	0.0619387	0.0235295	0.0543153	0.0607912	0.0196444	0.0548435	0.0189129	0.0253165	0.0139718	0.0373024	0.0136138
2-Hydroxy-5-methylacetophenone	0.0139278	0.0177354	0.0143249	0.015537	0.0134254	0.0106619	0.08902	0.0288374	0.0234411	0.00935387	0.0422535	0.031091	0.0524083	0.00584468	0.0149932	0.0741219	0.019159	0.0216629	0.0177914	0.00940994	0.023333	0.0168166	0.0167356	0.0185532	0.0237523	0.0237356	0.0190331	0.0134145	0.0460764	0.0388731	0.0119165	0.012054	0.0157905	0.0174775	0.0279277	0.340979	0.0168376	0.0159794	0.0550096	0.0226382	0.0408096	0.0644574	0.0216748	0.0919976	0.0147284	0.0305807	0.0161554	0.0240148	0.00791499
2-Methoxy-4-vinylphenol	0.0151487	0.0170606	0.0125866	0.015325	0.0114456	0.0107827	0.106436	0.0403195	0.0313489	0.00778814	0.0495538	0.0356632	0.0693891		0.0138863	0.0969938	0.0216747	0.0260332	0.0182602		0.0258349	0.0227246	0.021109	0.018578	0.0299291	0.0222593	0.0243761	0.0179302	0.0576394	0.0473454	0.00952329	0.00850078	0.0164888	0.0195664	0.0317581	0.434386	0.0236289	0.0195778	0.064619	0.0245423	0.0508054	0.0802592	0.0233044	0.111725	0.0159897	0.0338199	0.0143289	0.0317636	0.00347313
1,2-Dimethyl-3-pentyl-4-propylcyclohexane	0.882111	0.881693	0.792161	0.6274	0.963797	1.43428	0.449965	0.975173	0.651467	0.56689	0.806382	0.480308	0.824638	0.608183	0.795331	0.496289	0.686177	0.662758	0.797394	0.96602	1.59539	0.621946	0.440888	0.588617	0.54885	0.597758	0.768104	0.50159	0.568677	0.379223	0.78951	1.25556	1.05969	0.941549	0.648414	0.589115	0.46517	0.552776	0.550699	0.514302	0.701877	0.870486	0.666896	0.432383	0.625394	0.789462	0.926291	0.700377	0.746188
n-Decanoic acid	0.00556721	0.00501062	0.0050083	0.0124472	0.0143827	0.0112757	0.00424324	0.0124809	0.00587521	0.0159865	0.0128678	0.0111557	0.0118185	0.00827122	0.00679162	0.0181579	0.0179803	0.0179588	0.00502702	0.00573194		0.0121649	0.0121927	0.0102679	0.0119497	0.00880433	0.00563719	0.0172236	0.0347592	0.0431564	0.009929	0.012204	0.0116302	0.00801592	0.00730752	0.0156079	0.0105379		0.0105721	0.0116392	0.0187272	0.0140509	0.00998897	0.0527994	0.0223545	0.00785504	0.00467486	0.0141459	0.0108002
Biphenyl	0.035106	0.0525033	0.0610307	0.0402308	0.0574814	0.0605297	0.0332539	0.0436789	0.0331539	0.046293	0.0435002	0.0396687	0.0447149	0.0479736	0.0431836	0.03249	0.0483183	0.0454747	0.0554236	0.0661042	0.0676529	0.0302932	0.0440382	0.0369426	0.0403368	0.0439752	0.0345287	0.0361127	0.0451285	0.0457026	0.0573966	0.0555847	0.05112	0.0725525	0.0530927	0.0508548	0.0309312	0.0360968	0.0419561	0.0381452	0.0326162	0.0424312	0.0517216	0.0351064	0.0417518	0.0597749	0.0741442	0.0538579	0.0589796
Ethyl decanoate	0.00362823	0.00612582														0.0104607	0.0191799	0.00969852							0.124383	0.130836	0.172504	0.150278	0.246563	0.377379	0.0899881	0.14297	0.0820677	0.0473257	0.0657085	0.0373983	0.0832887	0.0364057	0.0817626	0.045378	0.142133	0.0281641	0.0271211	0.292695	0.225728	0.190508	0.123787	0.0603952	0.0563796
2,4-bis(1,1-Dimethylethyl)phenol	1.02842	1.67505	1.43131	1.02804	2.21855	1.72264	2.92586	5.03311	3.90348	6.75303	1.7316	4.7942	3.26633	6.26471	4.11926	0.641822	0.830358	1.29824	1.38111	2.05377	1.78375	3.48997	3.74399	5.5864	3.77944	6.40703	2.61668	4.67156	4.04969	5.68059	0.776382	1.43028	1.25619	2.01999	1.00381	1.73465	3.60317	2.52317	3.39402	4.89209	3.68493	1.81844	2.08429	4.80451	4.50963	0.869368	1.09822	0.810361	1.55466
702	0.102169	0.181491	0.178856	0.389486	0.324459	0.445172	0.298854	0.452862	0.261502	0.17446	0.147625	0.151774	0.232235	0.314778	0.337127	0.135586	0.328189	0.342641	0.257903	0.456964	0.427678	0.279282	0.218672	0.20132	0.371153	0.362079	0.319397	0.155187	0.142852	0.150662	0.550619	0.34955	2.00071	0.600909	0.518123	0.50277	0.162765	0.373185	0.372891	0.19352	0.207857	0.29224	0.120866	0.150621	0.171978	0.444282	0.615106	0.419141	0.482017
3,3-Diethyltridecane	0.574926	0.798836	1.05378	0.980426	1.18115	1.12528	0.571771	0.795257	0.711884	0.657787	0.616643	0.601582	0.621905	0.612538	0.618255	0.517478	1.17713	0.747714	1.02755	1.1399	1.55282	0.678507	0.706652	0.882843	0.938149	0.814515	0.620841	0.541937	0.562943	0.49298	1.10887	1.17479	0.819607	1.12494	0.886415	0.908623	0.468611	0.708889	0.898974	0.735194	0.491801	0.738653	0.82955	0.257697	0.881206	0.880118	1.23465	0.935129	0.903533
378	0.0096966	0.0102067	0.0105322	0.0346976	0.102028	0.0429587				0.0355142	0.0368047	0.0922674	0.126806	0.0481943	0.0330194	0.0314965	0.0239784	0.0375626	0.0178581	0.0110714	0.011567							0.0350564	0.109247	0.121555	0.00847915	0.0131178	0.0194808	0.0224943	0.0305131	0.063396				0.0308533	0.0545905	0.0767159	0.0180566	0.151429	0.0241656	0.0419195	0.00791159	0.0510677	0.0160911
[truncated: 69 more columns]

## Sheet: All Data_AVG
Compound	118	35	507	20	328	475	385	56	247	243	323	238	521	506	120	307	441	333	321	373	1	176	130	122	461	24	154	199	338	421	390	389	446	16	549	523	542	166	156	336
Isopropyl Alcohol							7.41624		0.94414	8.35778	8.18579	0.416504		3.77484	4.37465	8.79639	8.24662	0.951279	4.00801	4.82774	5.63219			2.63745	3.41378					7.60561	0.516112	1.01782		8.70466	2.18695	9.59113	10.9704	1.18924	1.06876	3.50405
2,3-Butanedione		0.380419	0.191605	0.0628529		0.525982	1.40352	0.217677	0.462753	1.65455	1.46003	0.411079	0.392634	0.634384	0.857226	1.769	1.58351	0.357822	0.935568	0.871117	1.11069	0.206441	0.501035	0.511072	0.658426	0.184703	0.174133	0.271542	0.141214	1.45243		1.21569		1.76853	0.59675	1.34348	2.17897	0.375412	0.351665	1.0723
Ethyl alcohol	0.293839	0.435995	0.421934			0.418095	7.51023	0.439271	1.79125	8.62485	8.38116	0.893694	0.661018	2.96257	4.60517	8.90654	8.28529	1.31954	3.30433	5.05527	5.85391	0.798221	0.442688	2.87891	3.65113	0.171544	0.24541	0.337674	0.514478	7.7118	0.890625	1.42291		8.96788	2.47263	9.72125	11.0251	1.68164	1.69402	3.83821
2-Propen-1-ol	0.0492286	0.0775758		0.0459698	0.0515698	0.0526556	0.0401109	0.048529	0.11159	0.0688742	0.115865	0.0332921		0.0486467	0.0701269	0.126516	0.0862968	0.021817	0.0923553	0.0329903	0.0337998			0.0693599	0.0820726	0.0912735	0.0217484	0.0354077	0.0247252	0.115291			0.0772198	0.117165		0.0683861	0.139064	0.0248045
3-Methylfuran	0.032056	0.0629228	0.0555165	0.0478481	0.0518686	0.0456854	0.0245999	0.0432462	0.0462627	0.05956	0.0198547	0.0403732	0.0463056	0.0489549	0.0420463	0.0389893	0.0236924	0.0483797	0.062004	0.0300665	0.0204712	0.0406188	0.041381	0.0611814	0.044598	0.0301637	0.0345394	0.0892923	0.0317308	0.0214212	0.0331935	0.0886663	0.0598237	0.0362409		0.0428118	0.0357453	0.028032	0.0529734	0.0684243
2-Methyl-3-buten-2-ol										0.107629												0.976845									0.126921	1.52985								0.233429
2-Methylfuran	0.0155883	0.0165671	0.0599137	0.0400472	0.0504121	0.0367856	0.0230698	0.0483942	0.0422622	0.0505382	0.0163725	0.0302069	0.0525489	0.0452272	0.0372565	0.0204352	0.0224672	0.0477228	0.0433134	0.0293238	0.0192123	0.0384402	0.0467569	0.0524138	0.0404822	0.0168762	0.0163639	0.111961	0.0299197	0.0166933	0.0226208	0.0994088	0.0310518	0.0418162		0.0307727	0.0259461	0.024609	0.0687785	0.0622905
Ethyl acetate	0.806247	0.537229	0.368658	0.403947	0.79409	0.64269	0.176717	0.163191	0.649263	3.76754	0.577252	1.69166	0.743131	1.04087	1.29104	0.857715	0.548355	0.461803	3.8334	1.25778	0.869045	24.5178	0.199367	0.283951	0.663298	0.0301841	0.173581	0.137772	0.197105	1.50145	2.6866	0.640514	0.378008	0.496793		2.11745	2.12383	0.605622	0.468387	7.80492
2-Methyl-1-propanol							0.316471		0.452448	0.738639	1.08263	0.197967		0.309322	0.644923	1.22521	0.715269	0.384289	0.970303	0.307585				0.677104	0.787294	0.144635	0.0637282	0.127356		0.930571		0.351294		1.07537		0.747171	1.19516	0.351981	0.266245
Acetic acid	6.33861	2.32852	1.50026	0.513489	0.638748	14.6118	1.08538	4.57046	2.38417	1.9136	0.542192	6.56109	2.88668	3.90281	1.26447	1.44538	0.721298	0.543795	8.99383	2.63785	0.781824	1.1633	3.13258	1.12136	0.365671	1.26887	3.22864	11.9426	0.269465	0.206575	0.441823	1.43808	0.799606	2.10073	0.513462	1.78668	3.62811	0.0191295	1.08119	13.0998
3-Methylbutanal							0.0446247			0.0849704	0.1591				0.100346	0.302501	0.157069	0.0552311	0.0593661						0.0480197					0.0330996		0.0680378		0.0675778		0.135956	0.134346	0.0722237
25							0.0166024				0.0126086						0.0142788				0.0177248									0.0103763					0.111303	0.0184053
Propanoic acid		0.067755	0.0309441	0.0361387	0.075566	0.0956993		0.0214047	0.073747			0.121822			0.0723905		0.0725614	0.026446	0.0680852					0.0427728	0.048593	0.0699566	0.0566392	0.0403148	0.0286959		0.0641039	0.0777593	0.0697658				0.0524301	0.0591313	0.0833066
1-Penten-3-ol				0.0777655		0.0400058			0.162048			0.0421484									0.0607716	0.74926				0.0631972	0.0671998	0.0247825	0.0249146	0.149836		0.158528		0.0605731		0.037904
2-Methoxy-2-methylbutane		0.0199039			0.0132766	0.031598	0.0322911			0.0244352	0.0307022	0.0231666				0.0298597	0.0237877				0.0219688			0.0206498	0.0156726	0.0163797	0.0206418			0.0207156			0.0262813	0.0246162		0.0246133	0.0287692
Isobutyl formate						0.215999		0.0997631				0.0878676											0.0791354					0.148426		0.063132		0.01504
3-Pentanone		0.0570139		0.0562081		0.0619979			0.162599			0.075284					0.057922			0.0819985	0.0671801			0.0727569		0.081668	0.0820703	0.0403514	0.0346871				0.0650675	0.135972		0.0471558
1-Hydroxy-2-propanone	0.344103	0.391522	1.36223	0.877815	0.637195	1.00519	0.494304	0.535111	0.604824	1.15043	0.294812	0.654926	0.723001	1.19471	0.940666	0.52089	0.688555	0.845816	0.901027	1.47943	0.26489	0.521773	0.758447	1.39451	0.451436	0.31042	0.272968	3.2874	0.37854	0.213479	0.544018	2.17209	0.590696	0.899862	0.305111	1.03738	0.629526	0.392419	1.59429	1.12846
2,4,4-Trimethyl-1-pentene		0.0535402		0.0612299			0.078177				0.106921	0.0908869				0.144055	0.104269				0.0848342						0.0856707			0.166604		0.154157	0.0920339			0.089394
3-Hydroxy-2-butanone	78.1729	104.043	29.477	19.8498	19.3435	46.1093	0.2534	29.2876		3.04123	4.2416	20.5333	18.6692	1.62659	1.66933	1.24058	1.40052	0.940198	21.4875	0.915084	1.06336		20.5555	2.17979	2.99787	45.9512	44.445	42.521	18.4715	0.398772	0.799316	1.67841	50.9718	2.75166	11.0172	0.424482	0.787857	0.590639	1.4964	17.0101
Ethyl propanoate										0.0541389										0.0881252		1.88402		0.088988	0.0764157					0.171095	1.32558	0.167814		0.175733
n-Propyl acetate																						3.47548
2-Methyl-1-butanol	0.302201	0.0664412	0.0391596	0.0327537	0.0263491	0.294953	1.021	0.244727	2.32706	2.68464	4.70822	1.33485	0.185661	1.84478	2.29957	4.28904	2.31591	1.88193	2.37099	1.61389	0.428082	1.26328	0.0286721	3.92388	2.57985	0.329964	0.50135	1.24337	0.0237317	3.43654	0.938165	2.39588	0.0410112	3.35481	0.101755	2.51293	3.26471	1.91163	2.21534	1.16838
3-Methyl-1-butanol	0.234904	0.0310609	0.0520288	0.0350075	0.0262135	0.302623	4.83155	0.304288	7.22585	8.5877	15.8923	2.1282	0.198178	7.30738	10.714	13.5727	8.97585	5.18012	8.23153	9.06174	0.511086	3.35893	0.0367108	7.80216	7.50216	0.570895	0.503789	2.35438	0.0336444	16.4822	3.75528	7.39395	0.0298026	12.9855	0.046804	7.0115	11.1901	5.92431	5.40623	4.96053
Methyl Isobutyl Ketone						0.00480195																													0.0239739
Dimethyl disulfide	0.0255008	0.024985				0.0177612	0.0156723														0.04978						0.0108182						0.0642418			0.0152406
2E-Penten-1-al		0.01937		0.0260077	0.0294838		0.020809										0.015141				0.0188693					0.0153697	0.0140718						0.0386155		0.0304429	0.0185676
Ethyl isobutyrate										0.182199					0.0937422	0.143521	0.0574314	0.0870874	0.118225	0.0818356		0.0765244		0.194164	0.120083					0.123226	0.756212			0.113954	0.231133	0.0929539	0.161231	0.0432318	0.117988	0.110711
716	0.15976	0.115708		0.084541	0.0777547	0.18477		0.085721				0.107638														0.253729	0.184466	0.147634		0.197937	0.245948	0.211564	0.106869
1-Pentanol							0.455509		0.135421	0.359076	0.395393				0.277288	0.473797	0.380265	0.103519		0.262714	0.486227			0.349274	0.328169					0.433649		0.219595		0.30819		0.431875	0.475696	0.11273	0.113884
Pyrrole		0.0388814	0.102134	0.0891767	0.103476			0.0385117	0.068768			0.0844474					0.0633671		0.114469	0.134285		0.0414543	0.0699583					0.231202	0.0327042			0.185032				0.0319092			0.177451	0.107852
Isobutyl acetate	0.673289	0.466192		0.449721	0.1055	0.617397			0.355287	0.378843		0.463553			0.242644		0.254246	0.156154	0.581471	0.216181		1.57038	0.1149	0.160831	0.179169	0.614707	0.586572			0.342263	0.428812	0.202571				0.190274	0.300966	0.0494608	0.204481	1.03496
635		0.533234	0.0844014	0.807316	1.06459	0.137946		0.463361	0.158157	0.177794			0.154963	1.24787	0.215896			0.185423	0.610369	0.132382		0.0269303	0.076935		0.326589	0.853015	0.378983	0.214379	0.621317			0.0709664	0.7478	0.143032	0.0644787	0.059353		0.014879		0.298567
2-Methyl-2-buten-1-ol	0.0176453			0.0234715						0.0259477	0.0176525						0.0268576						0.00506437				0.053272		0.0130092	0.0212143			0.0211057			0.0279184	0.0322607
636	0.128072	2.74352	0.385737	1.26539	1.27174	0.64202	0.865793	0.541292	0.287761	0.681918	0.383439	0.431606	0.458164	2.95064	0.394772	0.280184	0.689783	0.584243	1.2935	0.871768				0.747554	0.363027	1.77322	0.771738	0.147994	0.781816	0.364417	0.0442517	0.307	1.5997	0.271954	0.308121	0.0458215	0.22858	0.0372445	0.213461	0.869661
46							0.0260748		0.0124959		0.0162631					0.0128666	0.0149896				0.0255203						0.0239077									0.0175456	0.0183533		0.0197252
3-Methyleneheptane	0.0769595	0.0768387	0.0170054	0.0660012	0.0834327	0.0882696	0.112319	0.0208195		0.106838	0.127878	0.0771884		0.186946	0.068035	0.127056	0.0962222		0.0276581	0.2232	0.0801105			0.0589365	0.0828248	0.0804698	0.0848526	0.0326863	0.0108373				0.104334	0.109871	0.101031	0.0907397	0.107625	0.018553	0.0218809	0.089464
2-Methylpropanoic acid	0.80129	0.686372	0.247977	0.581826	0.368808	1.53176		0.6761	0.39016	0.0153506		1.07539	0.315944	0.721309	0.190109			0.115521	0.541602	0.241171			0.30973	0.179848		1.2912	0.764	1.39808	0.316162		0.150276	0.27404	0.788691					0.0547032	0.103873	0.780593
Isoamyl formate									0.628366				0.117555	0.737396						1.32453		0.357867							0.0362524	0.565857	0.206089
717		0.24471	0.0713051	0.0951239	0.124076	0.114812	0.0934622	0.0413582	0.0211561	0.065372	0.0261711	0.0592797	0.0546229	0.182014	0.0221312		0.0564316		0.0848023	0.110401			0.0203808	0.0821139	0.0293943	0.151589	0.127915	0.0310048	0.0290743	0.00584726		0.0124712	0.118864	0.0190997	0.0277144				0.0207503	0.0748312
Butanoic acid	0.0915395	0.0547725	0.0277673	0.0302072	0.0253024	0.099425	0.0445976	0.0406905	0.0344327	0.0961049	0.0464034	0.0913368	0.0290074	0.0518963	0.040824	0.0490588	0.0367168	0.0141837	0.142384	0.0934598	0.0300367		0.0559154	0.0685324	0.0249778	0.0398101	0.119022	0.0708658	0.0166399			0.0370302	0.0249984	0.0457423	0.0146989	0.0468506	0.0444581	0.00811872	0.0254533	0.11508
2,4-Dimethyl-3-pentanone	0.283622	0.26331		0.397154	0.299502	0.330604	0.493422		0.259473	0.275397	0.355734	0.3742		0.352724	0.250267	0.483339	0.431764		0.220125		0.289066	0.167723	0.113657	0.228854	0.371443	0.419764	0.412287	0.195811	0.136278	0.264549			0.296092	0.37378	0.376621	0.345838	0.434763	0.116874		0.377221
Ethyl butyrate									0.0409483	0.0432489	0.038554							0.0274909		0.120981				0.0641237						0.0666491	2.69592			0.0730477			0.0434722		0.0382297
637	0.2287	0.136561		0.148142	0.0727167	0.292667	0.0906005	0.0758522	0.165999	0.69251	0.31551	0.377664	0.305817	1.5933	0.262149	0.189111	0.272668	0.177277	0.683989	1.40306		0.0629768	0.0362301	0.414618	0.115765	0.149817	0.121162	0.227311	0.0564065	0.260532	0.372188	0.346828	0.591115			0.0424878	0.245277	0.0966154	0.204079	0.477002
718																										0.113868	0.0838564						0.178094		0.176941
2,3-Butanediol	0.0943181		0.265215	0.0839031		0.179344	0.25452	0.254498	0.376922	1.738	0.332517	0.345256	0.202445	0.423564	1.97845	0.252987	0.210917	0.171422	0.626961	1.91398	1.6079	0.252918	0.131764	0.97937	0.962379	0.095059	0.0648616	0.120104	0.195	1.51177	0.328581	0.326036	0.170036	1.35329	0.158036	2.08766	1.45075	0.245578	0.296177	0.71064
Furfural	0.131958	0.186451	0.667021	0.473542	0.492602	0.467744	0.200075	0.260855	0.247903	0.695491	0.119309	0.640251	0.414724	0.642793	0.479945	0.370827	0.25183	0.416202	0.728155	0.517489	0.107522	0.263543	0.404691	0.712273	0.441606	0.157749	0.110253	1.34506	0.189483	0.132445	0.223807	1.1604	0.413142	0.523891	0.1935	0.351455	0.32695	0.20203	0.726241	0.85423
719																										0.185937							0.159786
724		3.62191	1.48885	0.57781	0.416154			0.0704234															0.101689			0.103072	0.167952	0.0461071	0.247719		0.0274831		0.971791
725	0.195701	0.138277		0.576353	0.416024			0.0727997															0.101643										0.97413		0.102427
Ethyl 2-methylbutyrate															0.0635608			0.0295862	0.03673					0.0571043	0.0634955					0.0655918	0.20611				0.100951		0.0905091	0.0190768	0.0425969
Isovaleric acid	2.41177	0.356556	0.638799	0.535156	0.232415	2.84385	0.0282492	1.75477	0.21828	0.0387824	0.0582893	1.04683	1.14043	0.910398	0.0577481	0.0488866	0.0182006	0.0360772	0.305917	0.252772	0.0253064	0.0179368	0.267929	0.0352932	0.0375605	0.650857	1.68039	1.24191	0.0257752	0.023754	0.114845	0.157146	0.0880915	0.139472	0.139632	0.0310436	0.0467159	0.013914	0.0240536	0.919969
Crotonic acid										0.0135144	0.00835371				0.0207832			0.0238593			0.0136076	0.0192295			0.0230602					0.0103488	0.0264259			0.0193155		0.00840607	0.0125032	0.024607
2-Methyl-3-hexanol		0.132587		0.333767	0.181333																		0.0606231			0.755229	0.121027		0.5629				0.750859
2-Methylbutanoic acid	0.148457	0.185329	0.093511	0.303862	0.196132	0.367778		0.232768	0.128184	0.0527519	0.061113	0.121676	0.294893	0.432717	0.0310888	0.0416635		0.0212605	0.171166	0.227139		0.0220073	0.127795	0.0511835		0.144714	0.34471	0.271958		0.0245679	0.0619244	0.0496979		0.0647247	0.0111693		0.0313909	0.0141467	0.0163974	0.159121
2-Furanmethanol	0.151948	0.187558	0.829129	0.591031	0.496325	0.472887	0.181061	0.386891	0.295573	0.812189	0.120579	0.334614	0.533652	0.774525	0.631373	0.129417	0.206369	0.484681	0.484459	0.598304	0.109101	0.366273	0.535274	0.702218	0.414941	0.179927	0.162055	1.7602	0.329802	0.124096	0.407868	1.30403	0.378785	0.467866	0.181198	0.344659	0.388506	0.399029	0.962865	0.915356
1-Hexanol	0.241732	0.136206	0.0816108	0.157772	0.139851	0.230713	5.00507	0.197506	1.45179	2.80565	3.58291	0.622694	0.113401	0.847402	3.12571	4.21863	3.52218	1.26375	1.76068	1.77941	4.30958	0.648434	0.0528384	3.24014	3.01444	0.173495	0.199743	0.103301	0.059158	3.61338	0.851418	2.37519	0.162703	2.48596	0.225841	4.55275	3.67061	1.47904	1.31028	1.26645
Isopentyl acetate	0.379331		0.0566943			0.502687	0.0461713	0.369747	0.766196		0.648204	1.14534	0.736944	0.47264	0.796742	0.678587	0.659544	0.59502	2.29496	1.10325		15.3066		0.163005	0.363577	0.209145	0.16171	0.901892		1.48049	0.63993	0.425905		0.720935		0.40823	0.749288	0.238672	0.701674	2.14786
Dimethyl Sulfoxide		0.0271255		0.00620205	0.0105682					1.64448		0.0126636														0.0237447	0.011814		0.00594426				0.00986319
2-Cyclopentene-1,4-dione	0.00940511	0.012975	0.03214	0.0305475	0.0407635	0.0249523		0.0147973	0.018327	0.0515277		0.018394	0.0250103	0.0499335	0.030052	0.0223537	0.0149552	0.0193139	0.0377199	0.0593817			0.0207279	0.0451773	0.0268718	0.00901231	0.0113742	0.0905242	0.0118744	0.00635387	0.021064	0.0574836	0.0311292	0.0355245		0.0198641	0.0184389	0.0131849	0.0359477	0.0625678
2-Acetoxy-3-butanone	1.39928	7.42402	1.45697	1.2248	1.3389	0.198106		0.20765	0.0992572	0.14907		0.229002										0.0792249	0.215664			0.388384	0.401712	0.163986	0.331383		0.0482627		1.86893		0.350349					0.225803
Ethyl valerate										0.0231749	0.0138193				0.0141478			0.0224968		0.0139842										0.0473563	8.71623	0.0162836		0.0241013				0.00436716	0.0124251	0.0146094
Pentanoic acid	0.41412	0.138877	0.0788556	0.0266708	0.0470787	0.309579	0.102099	0.175939	0.0834075	0.095611	0.074632	0.217175	0.0976083	0.264604	0.0636557	0.0793875	0.0490227	0.0200696	0.191245	0.132607	0.0825984	0.0225389	0.0667841		0.0448032	0.126783	0.289302	0.240493	0.0350392	0.0464056	0.0269615	0.0460224	0.0135752	0.110487	0.0150258	0.0878673	0.0709587	0.0200816	0.0335471	0.29509
2-Heptanol	0.17781	0.0773748	0.0231834		0.029415	0.0430763	0.206699	0.0269505	0.0791911	0.087792	0.127603	0.113602	0.0433783	0.131537	0.129899	0.161415	0.128379	0.0337874	0.0840061	0.130815	0.0471646	0.0249673	0.013261	0.129652	0.141855	0.0319496	0.0365879	0.0231784		0.345824		0.0327365	0.0407927	0.0569629	0.0519962	0.34712	0.216769	0.0266001	0.0536429	0.109984
Butyl propanoate	0.0224639						0.0548987				0.0287141	0.0983059			0.0222323	0.0830804	0.106758			0.0250317	0.0851105					0.018225	0.0248221	0.0225662		0.0723769		0.0275265		0.0341356		0.0941147	0.0339041
2,5-Dimethylpyrazine	0.210348	0.241754				0.0369422	0.0408421				0.0310247					0.059026	0.0384382				0.212977					0.0241636	0.031459			0.162011					0.25771	0.21987	0.099562
Isobutyl isobutyrate																															0.6704
2-Acetylfuran	0.0246675	0.034074	0.0403777	0.0419219	0.0539734	0.0463058	0.0252392	0.017546	0.02345	0.057024	0.0344246	0.043814	0.0321089	0.0555597	0.053528	0.0224448	0.02401	0.0221458	0.0467796	0.0495742	0.0217607	0.0139776	0.0263483	0.0621938	0.0356554	0.0227861	0.0232882	0.0842254	0.0174603	0.0183958	0.0297553	0.0653573	0.0492828	0.0428835	0.0251621	0.0491504	0.0351075	0.0160467	0.0460328	0.0870457
Amyl acetate	0.0225461					0.0245471	0.0276445	0.0135071	0.0268688	0.0609611	0.0269061	0.0287997	0.0191485	0.0287655	0.0247183	0.0392688	0.0343542	0.0178584	0.054496	0.0340267	0.0363097	0.616584		0.0238253	0.0330603		0.0181881	0.0209561	0.0157584	0.040472	0.0492824	0.0403439		0.0318989	0.0381403	0.0510021	0.052584	0.0175077	0.0237175	0.0500666
720	0.070646	0.0593006	0.054487	0.0990904	0.0992248	0.0755607	0.0867904	0.0504188	0.0747827	0.0924532	0.0749669	0.0663815	0.0475629	0.0769376	0.0384816	0.0820691	0.0654483	0.0459278	0.0554792	0.0818956	0.0606213		0.0500609	0.0590187	0.0673014	0.0704859	0.0720638	0.0661322	0.0467747	0.0697887		0.0645294	0.115474	0.0792854	0.135142	0.075037	0.0807057	0.0419569	0.0525606	0.352428
2(5H)-Furanone	0.141845	0.14091	0.380822	0.259723	0.205678	0.316518	0.142377	0.136238	0.185848	0.379256	0.0924644	0.240071	0.225816	0.316433	0.297728	0.136688	0.151634	0.230583	0.27722	0.263807	0.0794568	0.167837	0.249767	0.32746	0.178682	0.103319	0.108911	0.7787	0.13699	0.0811194	0.263205	0.671913	0.195627	0.22626	0.115037	0.203857	0.280556	0.128469	0.465331	0.414189
710	0.0433783	0.0347833	0.253327	0.137014	0.110443	0.251987	0.0655903	0.0491682	0.057543	0.328711	0.0254172	0.136739	0.228007	0.28801	0.225822	0.100563	0.144606	0.240482	0.138339	0.186246		0.0278155	0.125889	0.203011	0.0613918	0.0593536	0.0393667	0.509608	0.0444614		0.0362049	0.720895	0.117015	0.175903		0.112749	0.259455	0.0256323	0.297749	0.284354
324	0.0393181	0.0302675	0.208474	0.144251				0.06899	0.130919	0.225777			0.0963328	0.174441	0.167913			0.139031	0.178152	0.209314		0.0394842	0.101907	0.199415	0.0723027	0.037695	0.0308196	0.379424	0.0510993	0.0317691	0.0626638	0.351757		0.16308		0.0489259	0.0734278	0.0468097	0.242779	0.220177
N,N-Diethylformamide	0.0144899	0.0160814	0.00663412	0.0117435	0.016425	0.0196975	0.0282195	0.00422429	0.00600197	0.0125747	0.0195282	0.0190135	0.00515097	0.0117123	0.0125612	0.0244049	0.0197432	0.0042277	0.00871385	0.0115795	0.0171246		0.00486541	0.0129872	0.0129636	0.0166518	0.0197537	0.00413465	0.00569884	0.0131908		0.0103994	0.0136632	0.0110628	0.0212358	0.0184257		0.00413539	0.00426149	0.0101007
1,2-Cyclopentanedione			0.327532	0.336235	0.238066	0.292407		0.130664	0.198994	0.363179		0.293674	0.32637	0.443387	0.328901			0.167617	0.349611	0.655253		0.0988172	0.257347	0.452211	0.16437	0.112413		0.626089	0.121897		0.149188	0.782803		0.347942				0.096167	0.390672	0.485958
2-Hydroxy-2-cyclopenten-1-one	0.0983597	0.0748297	0.312334	0.320503	0.232013	0.283974	0.0864462	0.123852	0.198994	0.359243		0.202493	0.317	0.433875	0.323212			0.168572	0.249886	0.655253		0.0935884	0.251244	0.319151	0.159003	0.10649	0.0623158	0.603192	0.117606		0.143512	0.535242	0.225949	0.254374		0.176132	0.225266	0.0879701	0.367404	0.470172
643	0.21912	0.233221	0.218615	0.344706	0.421056		0.258447	0.205693	0.286934	0.457428	0.239164	0.21615	0.180717	0.285945	0.372206	0.273834	0.218143	0.173525	0.150415	0.4003	0.240675	0.211603	0.168065	0.290637	0.389087	0.175422	0.191401	0.24182	0.170278	0.240367	0.168952	0.228247	0.440995	0.354491	0.480295	0.241129	0.245041	0.121318	0.139499	0.38614
Isobutyl butyrate		0.0151193	0.030956		0.0190535			0.0204163	0.0291367				0.0131942					0.024502				0.0146712	0.00936765					0.0193087	0.0286396		0.1712							0.0203353	0.0219525
5-Methylfurfural	0.00894725	0.0180309	0.043685	0.0374997	0.0502806	0.0358655	0.0136891	0.0168861	0.0145557	0.0576067	0.00893561	0.0374157	0.0229442	0.0658685	0.0418124	0.0405854	0.0254204	0.0297982	0.0478911	0.0460003		0.0128326	0.0231345	0.071092	0.0553738	0.0106688	0.0112346	0.101331	0.00914291	0.0111305	0.0172169	0.0868398	0.0333147	0.0514664	0.0248572	0.0286737	0.0226475	0.0112904	0.0419186	0.0773819
Dimethyl trisulfide	0.00926181	0.0220867	0.0155136			0.00782026	0.0121124	0.0221411						0.0135917			0.00972893				0.0410985					0.00671702	0.00707269	0.0214833	0.00902147	0.00486334			0.0387629		0.0121411	0.0153717			0.00697542	0.00711234
365									0.0375758		0.0162388		0.0194612					0.0339787				0.0358709								0.00950388							0.0126462	0.0328096	0.0419911
2,2,3,5-Tetramethylheptane	3.35134	3.40509	3.4261	4.75066	5.27816	2.76614	3.91789	3.51064	4.37331	5.77298	3.77372	3.11467	2.9425	3.93565	5.20772	4.22559	3.32672	3.08056	3.33161	4.92136	2.57824	3.42286	2.71821	3.82563	4.85221	2.86731	3.18472	3.46441	2.87432	3.49842	4.4674	3.61339	5.361	4.85489	6.1038	3.47963	3.58625	2.47106	2.23144	4.95874
Heptanol							0.257117		0.419507	0.234464	0.264452	0.125323			0.250794	0.395991	0.265795	0.224462	0.124951		0.245714	0.309958		0.232078	0.18561					0.267851		0.242417		0.212222		0.393226	0.18781	0.188647	0.214131
385	0.265946						0.349628					0.284826				0.458646											0.335253	0.170237								0.287679
Ethyl 3-ethoxypropionate																															1.35669
3-Ethyl-3-methylheptane	0.742147	0.742647	0.778779	0.945322	0.997252	0.601243	0.901236	0.783732	0.831159	1.22282	0.866338	0.769651	0.517484	0.699578	0.924364	0.984672	0.779451	0.608247	0.625272	0.926344	0.779472	0.60136	0.50934	0.745146	0.942713	0.60669	0.710863	0.832209	0.53202	0.817178	0.595491	0.774482	1.08809	0.913904	1.12135	0.74584	0.76899	0.421333	0.378036	0.958543
2,2,6,6-Tetramethylheptane	3.85173	3.77714	3.58486	4.78876	5.41235	3.0749	4.30758	3.66523	4.44832	5.80235	4.02664	3.47133	3.10801	4.2381	5.41294	4.52167	3.61295	3.25518	3.48221	5.02934	3.88351	3.33716	2.8341	3.96958	4.97313	3.08129	3.5121	3.62795	3.03001	3.85734	3.64668	3.77953	5.38496	5.11408	5.81416	3.80525	3.9208	2.59174	2.38532	5.0834
Hexanoic acid	1.75016	0.745073	0.316662	0.0857374	0.247354	1.61692	0.895499	0.530673	0.722129	0.165735	0.391932	1.09724	0.328428	0.963832	0.219016	0.413454	0.330442	0.136788	0.561261	0.549505	0.761473	0.0522266	0.264336	0.0551375	0.57559	0.759679	1.29506	0.8478	0.227426	0.608521		0.160413	0.138245	0.682434	0.0238508	0.638411	0.521931	0.134264	0.163839	0.942451
2-Pentylfuran	0.573841	0.671203	0.188608	0.184107	0.213246	0.218448	0.225844	0.191053	0.301351	0.198552	0.264859	0.234368	0.257765	0.22521	0.150391	0.318684	0.180875	0.192689	0.190404	0.213195	0.624654	0.179351	0.121135	0.155535	0.155982	0.166636	0.175564	0.199083	0.142977	0.702875	0.198852	0.202206	0.195104	0.186911	0.185713	0.664019	0.530991	0.132831	0.235867	0.198941
Ethyl hexanoate	0.0402775		0.0898236			0.0573584	0.0447267	0.119314	1.32702	0.818154	0.562118	0.12578	0.427269	1.48214	0.384917	0.358057	0.251465	0.477739	0.281287	1.90034	0.0201144	0.315522	0.0484453		0.138026	0.00575465		0.045884	0.0396197	1.4503	57.0991	0.231798		1.00532	0.0127696	0.461824	0.589655	0.295985	0.492238	0.53821
2,4,6-Trimethylpyridine			0.466457	0.0394167	0.0160437	0.0137032	0.0157957	0.498261	0.611375	0.0141721	0.0127836	0.0140772	0.600971	0.0283403	0.029548	0.0162384	0.0149935	0.494609				0.434767	0.305644	0.0214624	0.0147824	0.0112853	0.0143471	0.384056	0.432807		0.395391	0.0509869	0.0355166	0.0455247	0.0054434			0.414502	0.500331	0.0265443
2-Ethyl-5-methylpyrazine	0.0240409	0.0336128				0.0107766					0.0213199						0.022828				0.0876153						0.0203773			0.0831232						0.0404448	0.0274245
Ethyl (E)-3-hexenoate																															0.885007
Ethyl (Z)-3-hexenoate																															0.85607
2,2,7,7-Tetramethyloctane	6.2313	6.53065	5.21467	7.17008	7.68693	5.2244	7.28068	5.02544	5.86008	8.06002	6.83685	5.90344	4.30922	6.0667	7.80607	7.73681	6.19356	5.02886	5.40199	6.9705	6.38625	3.8561	4.3805	5.78304	6.85735	5.33299	6.0672	5.05453	4.60695	6.3713	4.88393	5.39722	7.46549	7.43135	8.65848	6.39985	6.47767	4.2228	3.66456	7.13712
Hexyl acetate										0.119528									0.13359			0.899141		0.0609458						0.026855		0.072937				0.042104	0.0548428		0.0645344	0.0668861
605	17.0543	17.7464	15.9907	18.0131	16.8896	14.5333	19.345	16.3258	18.8175	18.639	18.3052	16.5088	14.3984	15.3861	18.1932	20.4288	8.89595	15.8036	14.3288	16.1946	17.3731	14.8257	13.0485	13.9453	15.9295	14.5077	16.3508	16.5452	14.3033	17.5372	18.0817	17.4517	17.149	18.3487	19.7162	17.6974	17.9693	12.5681	11.336	16.5229
Benzyl Alcohol	0.0410019	0.0183627	0.0101523	0.00800658	0.00801569	0.0340275	0.104071	0.0235407	0.0937562	0.083345	0.0737525	0.0472707	0.0417033	0.1676	0.0895093	0.0997702	0.0791127	0.0280474	0.0687007	0.170122	0.0745641	0.0427205	0.0111592	0.129012	0.105537	0.0370978	0.0368178	0.0330005	0.0155617	0.158082	0.337316	0.0714665	0.0245022	0.0727955		0.0784577	0.0738433	0.0300181	0.0282064	0.0593104
Benzeneacetaldehyde	0.0763024	0.0678929	0.0404428	0.0703681	0.0600289	0.0656068	0.0795186	0.0670128	0.0676271	0.137941	0.21821	0.0995301	0.0505519	0.0822007	0.146228	0.23199	0.167481	0.0932873	0.105301	0.085991	0.169698	0.0683627	0.0348197	0.0700627	0.0939646	0.0756207	0.070177	0.042575	0.0455962	0.115083	0.0807177	0.136458	0.0536537	0.119493		0.14256	0.193798	0.159553	0.136004	0.126713
Ethyl 2-hexenoate																															0.552844
Heptanoic acid	0.0595731	0.0314459			0.0208049	0.077865	0.0442858	0.0295201		0.0261264	0.0241158	0.0489833		0.0729449	0.020073	0.0374995	0.0178262		0.0584564	0.0315679	0.0353625		0.017216		0.0376211	0.0293883	0.0580913	0.0525125		0.0220925				0.0525579		0.0244472	0.0223877			0.0574171
Tetramethylpyrazine		0.0195725																												0.0173599					5.28818		0.0331253
Ethyl heptanoate	0.00635159							0.0195522	0.162884	0.216486	0.137878	0.0342543	0.0508843	0.117209	0.105712	0.0963006	0.0609701	0.0931361	0.0849815	0.151902		0.0373678			0.0245035					0.211764	1.66583	0.0303054		0.233463		0.109263	0.124109	0.0605389	0.103199	0.133535
Phenylethyl Alcohol	0.692693	0.19119	0.307319	0.74223	0.0837454	4.12734	0.562729	12.705	21.5675	44.594	38.8003	7.48429	5.97513	24.0294	44.7164	22.8507	18.4052	13.6511	36.201	28.4899	0.147458	11.5696	0.214217	11.9525	14.9376	3.42581	2.1189	1.40342	0.0640409	13.1802	0.710293	14.1656	0.0865261	22.8998	0.610035	7.98125	26.599	23.0214	21.0963	36.4536
640	0.0292905		0.0259964	0.0334208		0.16083	0.0280496	0.365951	0.599499	1.83097	1.49147	0.289656	0.249682	0.976464	1.81647	0.872297	0.709836	0.558189	1.5534	1.14025		0.468197	0.0158904	0.539335	0.604464	0.134483	0.0847085	0.0662842	0.0166603	0.507412	0.0358102	0.578799		0.947072	0.0285812	0.305614	1.01791	0.931952	0.876889	1.46386
Isobutyl hexanoate																															7.95121
1-Phenyl-1,2-propanedione										0.0443566				0.108566					0.0660225	0.0195983				0.0519991	0.0340841					0.0711043	0.155781			0.0559823						0.112809
Benzyl acetate	0.00961678		0.0226245			0.00745257	0.0146031	0.00626408	0.0126426	0.0104734	0.0063398	0.0100294	0.0154652	0.00588166	0.00788517	0.00909696	0.00605311	0.00810277	0.0157868	0.00940623	0.0073845	0.462644	0.0110481	0.00788893	0.0108278	0.00386135	0.00548937	0.00963445	0.0299643	0.0222553	0.150701	0.018661	0.00513775	0.0160397		0.00951068	0.00788214	0.00445708	0.00874408	0.0105041
Ethyl benzoate				0.0177854	0.0308378		0.0251532										0.0130101	0.0245458			0.0129125		0.0108512					0.019994	0.00732412	0.0739897	0.156131	0.0146094	0.0194934	0.0132863	0.0103721
Benzenecarboxylic acid	0.0316443	0.0283355	0.0417278	0.0292781	0.0395742	0.0607753	0.0309936	0.0387088	0.0514973	0.111664	0.0304408	0.0579982	0.0522995	0.136585	0.0871203	0.045797	0.0287493	0.0406731	0.111188	0.0464664	0.0427867	0.0215657	0.0293282	0.0696926	0.0671917	0.0289099	0.0360167	0.120288	0.0153217	0.0301534	0.154212	0.0630577	0.0319056	0.107693	0.0107725	0.0792969	0.0711006	0.0364315	0.0401465	0.130154
Octanoic acid	0.0637996	0.0367621	0.0606318	0.0541948	0.0494821	0.0900894	0.058155	0.0809475	0.0653648	0.156112	0.0460742	0.0944504	0.0605694	0.102846	0.0950658	0.0673401	0.0586474	0.0244822	0.13899	0.154084	0.0394635	0.0341076	0.0448008		0.0947379	0.04356	0.0560272	0.11967	0.0432253	0.0515607		0.0386382	0.0478053	0.151347		0.0575781	0.0560833	0.0281902	0.0388359	0.181457
Phenylethyl alcohol, formate									0.392194	0.0601163	0.0293192		0.124858	0.150977			0.0147418			0.406028		0.0678112
Ethyl octanoate	0.0322268	0.00715567	0.0253095	0.0101629		0.0683643	0.0234245	0.118307	0.404692	1.5424	0.883953	0.29668	0.26266	0.158018	1.01073	0.963521	0.460111	0.445892	0.511168	0.961893		0.110123	0.0101627		0.185052	0.00584525	0.00486101	0.0115748		0.959659	0.386325	0.0645348		1.70873		0.624943	0.77866	0.228177	0.46017	0.949809
651	0.881058	1.06193	0.923108	0.567683	0.786797	0.939906	1.66233	0.898962	1.02116	0.590733	1.44131	1.33513	0.997607	0.553233	0.478599	2.23422	1.70846	0.922097	0.65006	0.590939	1.91663	0.934481	0.826346	0.572577	0.514422	1.17397	1.65459	1.25901	0.579969	1.16076	1.63837	1.26304	0.779673	0.754093	0.829161	1.61482	0.907519	0.676814	1.17751	0.895171
2-Phenoxyethanol	0.030401		0.0088887			0.0133721	0.0193345	0.00604714	0.0108281	0.006091	0.00952242	0.0189638	0.00920122			0.0139796	0.0078349	0.00868263			0.011591	0.00394049				0.00828728	0.0125677	0.00853855		0.016017	0.0181291	0.0114379				0.00657616	0.0425988
Isopentyl hexanoate																															3.4366
1,3-Di-tert-butylbenzene	26.0701	31.6224	25.5599	35.7699	33.9661	29.8839	41.8551	25.6998	27.3256	34.6599	34.0551	32.8831	25.3723	31.234	39.6675	41.3094	24.3423	27.5768	31.4101	32.3251	32.2634	25.2568	21.8855	31.573	30.5222	27.1984	30.9936	27.7831	25.8351	33.4476	35.5732	32.2355	31.6197	38.429	37.9658	31.4221	28.7565	25.9312	22.3117	33.1238
Phenylethyl acetate						0.0985519	0.547228	0.461609	0.118447	1.03185	0.140748	0.159464		0.160644	0.805945	0.211801		0.162774	2.59582	0.39996		7.97768		0.173112						17.0029		7.43999		26.2875			0.251773	0.212426	0.302506	2.32589
Nonanoic acid	0.0215585	0.0178561	0.0591411	0.0343836	0.0348647	0.0528861	0.0299498	0.0528773	0.0628548	0.0532092	0.0124324	0.0497923	0.0469548	0.0568752	0.0520018	0.0204591	0.0189026	0.0415752	0.0870853	0.0469295	0.0225381	0.0299624	0.034555	0.0339467	0.0389942	0.0170958	0.0214032	0.0773884	0.0374895	0.0226975	0.0399366	0.0472157	0.033451	0.0508035		0.0283077	0.0270782	0.0299797	0.0522137	0.108032
4-Ethyl-2-methoxyphenol									0.017677	0.0266205			0.0162172	0.0206304					0.018414					0.0215508	0.0128376							0.0321197			1.01324				0.020228	0.0248277
661	0.81542	0.906673	0.623973	0.683839	0.665768	0.669771	1.00158	0.608417	0.629214	0.642974	0.899445	0.856927	0.573748	0.591465	0.705797	0.949597	0.795724	0.524707	0.69599	0.576227	0.933108	0.520704	0.513334	0.556117	0.547171	0.749587	0.819748	0.688726	0.639172	0.963039	0.97337	0.858776	0.528617	0.794926	0.741224	0.967901	0.973126	0.543786	0.635721	0.594807
Indole	0.0140341	0.0199454	0.0337996	0.0321812	0.0251947	0.0386838	0.0191968	0.0152485	0.0240814	0.0683192	0.0272294	0.0419345	0.0321289	0.046212	0.0311336	0.0196442	0.0218962	0.0349213	0.0501436	0.0509807	0.0173902	0.0246295	0.0249818	0.0386924	0.0204431	0.0161943	0.024554	0.069589	0.0171487	0.0247307	0.0201133	0.0761424	0.0227608	0.0451092	0.0135483	0.0292874	0.0337375	0.0160362	0.0488587	0.064533
2-Hydroxy-5-methylacetophenone	0.0153294	0.0132081	0.0470995	0.0275661	0.0244154	0.0383146	0.0168448	0.0173684	0.0221737	0.032788	0.0132537	0.128795	0.0292755	0.0426351	0.0428003	0.0233681	0.0140957	0.0323838	0.194995	0.0330097	0.0127293	0.0167063	0.0349245	0.208817	0.0140426	0.0129126	0.0111277	0.112943	0.0188218	0.0140904	0.0191883	0.0754602	0.0162878	0.0290321	0.910463	0.0291499	0.0190491	0.0196904	0.0794736	0.0973178
2-Methoxy-4-vinylphenol	0.014932	0.0125178	0.0593683	0.0310017	0.0416377	0.0482339	0.0220476	0.0208039	0.0255215	0.0409717	0.0115043	0.161904	0.0359419	0.051869	0.0503397	0.0240744	0.0153023	0.0376793	0.164648	0.037696	0.0126697	0.0185427	0.0438556	0.265667	0.013805	0.0125014	0.011426	0.144055	0.0223069	0.0110428	0.0200981	0.0940938	0.0248032	0.0327786	1.16902	0.0455577	0.0240442	0.023537	0.102574	0.125054
1,2-Dimethyl-3-pentyl-4-propylcyclohexane	0.851988	1.00849	0.692202	0.61786	0.742717	0.615075	1.1196	0.550484	0.638237	0.483163	1.03492	0.726359	0.522882	0.695555	0.574891	0.857877	0.737186	0.635371	0.704734	0.520432	0.858115	0.468361	0.552169	0.650999	0.654708	0.622011	1.07917	0.679779	0.702394	1.00446	0.838877	0.806547	0.437313	0.681301	0.748766	1.00052	0.967036	0.450804	0.537151	0.793104
n-Decanoic acid	0.00519538	0.0127019	0.00753311	0.0133367	0.00896044	0.0180323	0.00537948	0.0115419	0.00879706	0.0317131	0.0112544	0.0103105	0.010555	0.0148058	0.028381	0.00626495	0.0115652		0.0199539	0.0224262	0.0116663	0.00710386	0.0045025		0.0128872	0.00963021	0.010924	0.0146823	0.00947225	0.0132407				0.0185738		0.0147743	0.0124699		0.00753622	0.0489342
Biphenyl	0.0495466	0.0527473	0.0366955	0.043154	0.0452907	0.0420943	0.0630602	0.0370913	0.0396135	0.0423146	0.0547005	0.0588333	0.036328	0.0377309	0.0428599	0.0669595	0.0561784	0.0406534	0.0396304	0.0392468	0.0537454	0.0361717	0.0312939	0.0388587	0.0363729	0.0450188	0.0517962	0.0415521	0.038297	0.0678121	0.0602093	0.0467149	0.0335101	0.0476939	0.0743683	0.06012	0.0547975	0.0396493	0.0362968	0.0431964
Ethyl decanoate	0.00487703					0.013113			0.142575	0.258073	0.105009	0.0501442	0.0671524	0.0718916	0.181848	0.157148	0.0520181	0.0631952	0.0640157	0.280541		0.0119519			0.0311657					0.159319	0.0352358			0.242129		0.067142	0.101946	0.0230186	0.0803343	0.17338
2,4-bis(1,1-Dimethylethyl)phenol	1.37826	1.65641	3.95415	4.42627	4.5501	0.923474	1.73954	4.27345	4.26772	4.80061	1.15428	1.58615	3.17345	3.46515	3.79947	0.983793	1.03236	3.35787	2.56527	5.23857	1.92164	3.61915	3.91866	3.52593	4.0877	0.805715	1.00183	4.44763	4.21136	1.75034	3.4997	4.64698	4.00314	4.53145	5.31662	1.76186	1.67731	3.79652	3.18673	4.19593
702	0.154172	0.386372	0.337739	0.157953	0.294713	0.268805	0.380848	0.233091	0.350876	0.149567	0.96696	0.5406	0.302947	0.231206	0.147822	0.529694	0.448033	0.218562	0.20489	0.323103	0.480413	0.24741	0.218824	0.200127	0.210454	0.28409	0.49625	0.329382	0.326577	0.419031	0.442473	0.453116	0.276062	0.248403	0.37682	0.289162	0.255931	0.243904	0.211465	0.163319
3,3-Diethyltridecane	0.809182	1.09562	0.692971	0.625337	0.617566	0.814107	1.24009	0.756001	0.791168	0.53262	1.03443	0.973325	0.692158	0.655216	0.656151	1.05738	1.00986	0.540668	0.59689	0.590946	1.0189	0.584147	0.561807	0.48946	0.459151	0.779062	1.02513	0.757604	0.679036	1.078	1.05771	0.913909	0.577419	0.754057	0.703844	0.996798	0.99798	0.635476	0.743228	0.505403
378	0.0101452	0.0598947		0.0548621	0.0693399	0.0310125	0.0134988			0.0886194	0.0136926	0.0388011		0.0540532	0.0645504	0.0249156	0.0281811		0.0409173	0.0862969	0.0136299			0.0905563	0.0275261	0.0275523	0.0259217	0.0216832		0.00838508		0.0645919	0.0684705	0.0569133	0.0597921	0.0342973	0.0159988			0.0506438
